# Supplementary material for: Dementia-friendly prisons: a mixed-methods evaluation of the application of dementia-friendly community principles to two prisons in England
Source: PubMed Central journal article supplement — BMJ Open. 2019 Aug 8;9(8):e030087. doi: 10.1136/bmjopen-2019-030087 (PMC6701663; doi:10.1136/bmjopen-2019-030087), 2019-08-08
Supplement: bmjopen-2019-030087.draft_revisions.pdf [file bmjopen-2019-030087.draft_revisions.pdf]

# BMJ Open

BMJ Open is committed to open peer review. As part of this commitment we make the peer review history of every article we publish publicly available.

When an article is published we post the peer reviewers' comments and the authors' responses online. We also post the versions of the paper that were used during peer review. These are the versions that the peer review comments apply to.

The versions of the paper that follow are the versions that were submitted during the peer review process. They are not the versions of record or the final published versions. They should not be cited or distributed as the published version of this manuscript.

BMJ Open is an open access journal and the full, final, typeset and author-corrected version of record of the manuscript is available on our site with no access controls, subscription charges or pay-per-view fees (<http://bmjopen.bmj.com>).

If you have any questions on BMJ Open's open peer review process please email [info.bmjopen@bmj.com](mailto:info.bmjopen@bmj.com)

# BMJ Open

## **Dementia Friendly Prisons - a mixed methods evaluation of the application of dementia friendly community principles to two prisons in England**

|                               |                                                                                                                                                                                                                                                                                                                                                                                                                                                                                                     |
|-------------------------------|-----------------------------------------------------------------------------------------------------------------------------------------------------------------------------------------------------------------------------------------------------------------------------------------------------------------------------------------------------------------------------------------------------------------------------------------------------------------------------------------------------|
| Journal:                      | <i>BMJ Open</i>                                                                                                                                                                                                                                                                                                                                                                                                                                                                                     |
| Manuscript ID                 | bmjopen-2019-030087                                                                                                                                                                                                                                                                                                                                                                                                                                                                                 |
| Article Type:                 | Research                                                                                                                                                                                                                                                                                                                                                                                                                                                                                            |
| Date Submitted by the Author: | 26-Feb-2019                                                                                                                                                                                                                                                                                                                                                                                                                                                                                         |
| Complete List of Authors:     | Treacy, Samantha; University of Cambridge Department of Public Health and Primary Care, Cambridge Institute of Public Health<br>Haggith, Anna; University of Cambridge, Cambridge Institute of Public Health<br>Wickramasinghe, Nuwan; University of Cambridge, Cambridge Institute of Public Health; Rajarata University of Sri Lanka Faculty of Medicine and Allied Sciences, Department of Community Medicine<br>Van Bortel, Tine; University of Cambridge, Cambridge Institute of Public Health |
| Keywords:                     | Prisoner health, Older prisoners, Peer support, Environment, Awareness raising, Dementia                                                                                                                                                                                                                                                                                                                                                                                                            |
|                               |                                                                                                                                                                                                                                                                                                                                                                                                                                                                                                     |

SCHOLARONE™  
Manuscripts

1  
2  
3 **Dementia Friendly Prisons - a mixed methods evaluation of the application of dementia**  
4  
5 **friendly community principles to two prisons in England**  
6  
7  
8  
9  
10  
11

12 **\*Samantha Treacy**, Cambridge Institute of Public Health, University of Cambridge, School of  
13  
14 Clinical Medicine, Cambridge Biomedical Campus, Forvie Site, Robinson Way, Cambridge  
15  
16  
17 CB2 0SR, UK; [st617@medschl.cam.ac.uk](mailto:st617@medschl.cam.ac.uk); Tel No: +44 1223 330321  
18  
19  
20  
21

22 **Anna Haggith**, Cambridge Institute of Public Health, University of Cambridge, UK  
23  
24  
25  
26

27 **Dr Nuwan Darshana Wickramasinghe**, Cambridge Institute of Public Health, University of  
28  
29 Cambridge, UK; Department of Community Medicine, Rajarata University of Sri Lanka, Sri  
30  
31 Lanka  
32  
33  
34  
35  
36

37 **Dr Tine Van Bortel**, Cambridge Institute of Public Health, University of Cambridge, UK  
38  
39  
40  
41  
42  
43  
44  
45  
46  
47  
48

49 Word Count 4,099  
50

51 \*Corresponding author  
52  
53  
54  
55  
56  
57  
58  
59  
60

**ABSTRACT**

**Objectives:** To apply and evaluate dementia friendly community (DFC) principles in prisons.

**Design:** A pilot study and process evaluation using mixed methods, with a one-year follow-up evaluation period.

**Setting:** Two male prisons: a Category C sex offender prison (prison A), and a local prison (prison B).

**Participants:** 68 participants - 50 prisoners, 18 staff

**Intervention:** The delivery of dementia information sessions, and the formulation and implementation of dementia friendly prison action plans.

**Measures:** Study-specific questionnaires; Alzheimer's Society DFC criteria; semi-structured interview and focus group schedules.

**Results:** Both prisons hosted dementia information sessions which resulted in statistically significant ( $p > 0.05$ ) increases in attendees' dementia knowledge, which were sustained across the follow-up period. However, only prison A formulated and implemented a dementia action plan, which was mostly consistent with DFC criteria. Prison A participants reported some progress on awareness raising, environmental change and support to prisoners with dementia in maintaining their independence. The meeting of other dementia friendly aims was less apparent. Numbers of older prisoners, and those diagnosed with dementia appeared to have the greatest impact on engagement with dementia friendly community principles, as did the existence of specialist wings for older prisoners or those with additional care needs. Other barriers and facilitators were also reported within the

1  
2  
3 prison institution and environment, staff teams, prisoners, the prison culture and external  
4  
5 factors.  
6  
7

8  
9 **Conclusions:** DFC principles appear to be acceptable to prisons with some promising  
10  
11 progress and results found. However, a lack of Government funding and strategy to focus  
12  
13 action around the escalating numbers of older prisoners and those living with dementia  
14  
15 appears to contribute to a context where interventions targeted at this highly vulnerable  
16  
17 group can be deprioritised. A more robust evaluation of this intervention on a larger scale  
18  
19 over a longer period of time would be useful to assess its utility further.  
20  
21  
22  
23  
24  
25  
26  
27  
28  
29  
30  
31  
32  
33  
34  
35  
36  
37  
38  
39  
40  
41  
42  
43  
44  
45  
46  
47  
48  
49  
50  
51  
52  
53  
54  
55  
56  
57  
58  
59  
60

## ARTICLE SUMMARY

### Strengths and limitations of this study

- This is the first study published exploring the applicability of dementia friendly community principles in prisons that we have found, and is one of the only projects published worldwide to evaluate the support and/or management of prisoners living with dementia
- The PPI/E component of the study was invaluable in establishing the need for dementia-focused work, targeting the intervention and preparing study materials
- Involving people with dementia and their families in the intervention was particularly difficult to achieve in a prison context
- The relatively small sample size coupled with high prisoner and personnel turnovers made quantitative analysis challenging
- The number of participants interviewed and involved in focus group discussions provided a rich set of data to explore findings

### KEYWORDS

Dementia, prisoner health, older prisoners, peer support, environment, awareness raising

## INTRODUCTION

The numbers of prisoners over the age of 50<sup>1</sup> in England and Wales have tripled since 2002, and now represent 16.3% of the overall prison population.[1] This is projected to rise further in future.[2-3] Health problems and social care needs are reportedly extensive among this group, estimated to affect over 85% of older prisoners, with an approximately three-fold increase in costs.[4-8] The number of prisoners diagnosed with dementia specifically is unknown, but is at least commensurate with community levels, although likely to be much higher due to the poorer health and lifestyles of prisoners, and the effects of a prison system built for younger, fitter prisoners.[4-5, 9-12] Additionally, prisoners living with dementia [PLWDs] may have harsher prison experiences than their more cognitively able counterparts, which can exacerbate their symptoms, as they are more likely to be vulnerable to victimisation, isolation, and punishment for failing to 'comply' with prison routines.[5, 10, 13-17] It is a matter of national policy that prisons provide a standard of care equivalent to that in the community,[18-19] but a recent parliamentary inquiry has stated that despite some areas of good practice, the government is failing in its duty of care to prisoners in England and Wales.[20]

Dementia has become a health and social care policy priority in the UK, with the Governments' dementia strategy promoting the establishment of Dementia Friendly Communities [DFCs],[21-22] defined as places "where people with dementia are understood, respected and supported".[23, p1] Key DFC principles include: the empowerment and involvement of people with dementia, increased dementia awareness, challenging stigma, timely access to care, and supportive social and physical environments.[23] Evaluations of DFCs in UK communities mostly reported increases in

1  
2  
3 dementia awareness, but progress on social and environmental change varied and the  
4 involvement of people living with dementia were limited in the short-term.[24-30] There  
5  
6 have been no published evaluations found applying DFC principles in prisons in England and  
7  
8 Wales. Indeed, research focused on PLWDs appears to be extremely limited, with no  
9  
10 published evaluations of interventions found anywhere in the world. Given the human  
11  
12 rights and financial concerns surrounding the imprisonment of older prisoners and  
13  
14 PLWDs,[16, 31-34] it seems imperative to explore, implement and evaluate programs  
15  
16 focused on supporting this highly vulnerable population.  
17  
18  
19  
20  
21  
22  
23  
24

## 25 **RESEARCH AIMS**

26  
27 This research project aimed to explore the application of the Alzheimer's Society Dementia  
28  
29 Friendly Community principles to two diverse prisons. The research questions included:  
30  
31  
32  
33

- 34 1) What progress was made towards applying DFC principles at each prison?
  - 35 2) What was the impact of implementation?
  - 36 3) What contextual factors affected implementation?
- 37  
38  
39  
40  
41  
42  
43  
44

## 45 **METHOD**

### 46 **PROJECT DESIGN**

47  
48 The research was structured as a small-scale pilot study and process evaluation, employing a  
49  
50 mixed methods design, with a one-year follow-up period. It was conducted in three stages:  
51  
52  
53  
54

- 55 (i) Patient and Public Involvement/Engagement [PPI/E] – established the need for  
56  
57 dementia-related interventions at each prison, identified the people and site for  
58  
59  
60



1  
2  
3 the intervention, and assisted in modifying evaluation materials. Prisoners were  
4  
5 not directly involved in recruiting or conducting the evaluation, but findings were  
6  
7 fed-back to prisoners through short reports and presentations where applicable.  
8  
9

- 10 (ii) Intervention – the delivery of hour-long Dementia Friends Alzheimer’s Society  
11  
12 information sessions  
13  
14 (<https://www.dementiafriends.org.uk/WEBRequestInfoSession>), and meetings  
15  
16 between prison staff and Alzheimer’s Society representatives to plan and  
17  
18 implement DFC-led alterations.  
19  
20  
21  
22 (iii) Evaluation – of the information session, of progress towards implementing DFC  
23  
24 principles, and of contextual factors affecting their application.  
25  
26  
27  
28  
29  
30

## 31 **PROJECT CONTEXT**

32  
33 This study was conducted in two prisons in the East of England. Prison A was a Category C  
34  
35 sex offender prison with 34.2% of the population aged over 50,[35] and two opt-in 120 bed  
36  
37 wings for older prisoners (aged >60 years). Prison B was predominantly a local prison<sup>2</sup> with  
38  
39 16.1% of the population over 50,[36] with a 26-bed wing for older prisoners, and a 15-bed  
40  
41 palliative and significant social care needs wing. This prison also had 24-hour healthcare  
42  
43 staff and an inpatient wing.  
44  
45  
46  
47  
48  
49  
50  
51  
52

## 53 **PARTICIPANTS**

54  
55 46 prisoners were involved in the PPI/E phase of the project. 45 prisoners and staff attended  
56  
57 information sessions, all of whom were invited to participate by prison staff. 68 prisoners,  
58  
59  
60

1  
2  
3 AS representatives and staff also took part in the evaluation either directly invited by  
4  
5 researchers (for those who had previously consented to contact at the information session)  
6  
7 or prison staff. Recruitment to all phases of the study was aimed at individuals most likely to  
8  
9 be involved in supporting PLWDs and included: older prisoners, prisoner peer supporters  
10  
11 and, staff working on specialist (older prisoner or health-oriented) wings. One PLWD  
12  
13 participated in PPI/E at Prison A, although none were involved in the evaluation.  
14  
15  
16  
17  
18  
19  
20  
21

22 For the follow-up interviews and focus groups, information session attendees and staff who  
23  
24 had been involved in planning and implementing DFC principles were invited to participate.  
25  
26 The numbers of information sessions attendees reduced substantially across this period,  
27  
28 therefore other prisoner peer supporters and prison officers who were interested in  
29  
30 dementia at the prisons were also invited by prison staff to participate. For the follow-up  
31  
32 evaluation, all staff participants were interviewed. Prisoners were selected for interview  
33  
34 based on the type of peer supporter role they occupied – a representative of each role was  
35  
36 chosen, and the remaining prisoners participated in focus groups.  
37  
38  
39  
40  
41  
42  
43  
44  
45

## 46 MATERIALS

47  
48 Information sheets and consent forms were developed by the research team and modified  
49  
50 according to National Offender Management Service [NOMS] specification. The rest of the  
51  
52 materials used included:  
53  
54

- 55  
56  
57 (a) Alzheimer's Society Foundation Criteria for the Dementia-Friendly Communities  
58  
59 Recognition Process[37]  
60

- 1  
2  
3 (b) Socio-demographic questionnaire  
4  
5  
6 (c) A study-specific Information Session Evaluation questionnaire with open and closed  
7  
8 questions on knowledge, learning and confidence regarding dementia  
9  
10  
11 (d) Study-specific Dementia Friendly Prisons evaluation questionnaire based on the key  
12  
13 DFC principles[23]  
14  
15 (e) The 'Dementia Friendly Physical Environments Checklist'[38]  
16  
17  
18 (f) Semi-structured interview schedules and focus group frameworks focused on the  
19  
20 information session, support and barriers for PLWDs, and prison dementia  
21  
22  
23 friendliness  
24  
25  
26  
27

## 28 PROCEDURES

29  
30  
31 The three steps taken in this project – PPI/E, Intervention and Evaluation – and their  
32  
33 sequencing are shown in Figure 1:  
34  
35

### 36 <Figure 1: Project procedure>

37  
38  
39  
40 Both prisons facilitated PPI/E activities, then hosted dementia information sessions, and had  
41  
42 initial meetings with AS representatives, but only Prison A created and implemented DFC  
43  
44 plans. Both Prison A and B participated in evaluation activities. A six-month interim follow-  
45  
46 up occurred at Prison A due to rapidly falling numbers of information session attendees, and  
47  
48 a full one-year follow-up was conducted at both prisons. At both follow-up points, prisoner  
49  
50 interviews were taped during legal visits, focus groups within the prison were scribed and  
51  
52 staff interviews were taped at suitable locations within and outside of the prison. Informed  
53  
54 consent was sought from all follow-up participants prior to interviews or focus groups.  
55  
56  
57  
58  
59  
60

## DATA ANALYSIS

### *Quantitative analysis*

The data from the questionnaires were analysed using SPSS version 23. The data were analysed using either a Chi-squared, McNemar, or Wilcoxon signed-rank test. Statistical analysis focused on changes pre- and post-session and at follow-up.

### *Qualitative analysis*

All taped interviews were transcribed verbatim which together with focus group flipcharts, were subject to a Framework Analysis[39]. This approach was selected as it could accommodate differing data sources, and provided a clear and systematic structure for a team-based analysis. Using an inductive approach, all researchers: (i) read interviews and noted initial themes; (ii) analysed five transcripts in-depth, noting further themes; (iii) based on this created an analytical framework with main emergent themes; (iv) used this framework to 'code' all material - two researchers independently categorised each transcript using NVivo 11 or MS Word; (v) analyses were combined and summarised in an MS Excel spreadsheet, with differences resolved within the team; and (vi) findings were interpreted.

## RESULTS

### **PARTICIPANTS**

A total of 68 individuals (50 prisoners and 18 staff) participated at different stages of this project, as shown in Figure 2:

**<Figure 2: Flow of participants>**

The project took place in two male prisons, with the majority of prisoners identifying as male (n=49, 98%), and one prisoner identifying as transgender. Conversely, the staff sample was mostly composed of females (n=11, 79%, missing =4). The mean age of the sample was 45.3 years, and ranged from 23-76 years (missing=8). The mean age of the prisoner participants from Prison A (50.6 years) was almost 10 years higher than the prisoner participants held at Prison B (40.9 years). This difference was statistically significant ( $t(44)=2.793$ ,  $p=0.008$ ). The overall mean age differences between prisons and between prisoners and staff were not statistically significant.

Of the 45 individuals who attended information sessions, 12 were followed up at six-months from Prison A, and seven from both prisons were followed up at one-year, although only two of these were followed-up at both six-months and one-year. 23 people participated in the follow-up stages of the evaluation who had not attended information sessions, largely at one-year (n=21). Across the follow-up evaluation, 19 interviews were conducted with prison staff (n=11), prisoners (n=6) and AS representative (n=2). A further 24 prisoners participated in focus groups.

## KEY FINDINGS

This section will discuss the three research questions on progress, impact and context that this project sought to answer, and present an analysis of each.

### RESEARCH QUESTION 1: PROGRESS

Both prisons agreed to participate and engaged in the project and evaluation, but they differed in the extent of their engagement. Progress was measured against Alzheimer's Society criteria,[37] which is summarised in Table 1 for each prison.

<Table 1 here>

Prison A met a number of the criteria which included joining a local Dementia Action Alliance<sup>3</sup>, creating a DFC plan which was posted on the internet, running awareness raising events, and making small environmental changes. Actions in these areas were reportedly ongoing, although mostly were being implemented within the older prisoner wings.

Progress was also reported to be slow:

*"I feel I've been so lucky to be involved in this project...it's one of the few places that I've been where they've actually listened... and it's slow, but it's going to be slow, you just have to accept that. But, they do listen, and every time I go ...something has happened in relation to what I've talked about previously. And that is so unique" (Prison project worker).*

**Table 1: Progress as measured against Alzheimer's Society Foundation Criteria (2014)**

| CRITERIA                                                        | PRISON A                                                                                                                                                                                                                                                                                                                                                                                                                           | PRISON B                                                                                                                                                                                                                                           |
|-----------------------------------------------------------------|------------------------------------------------------------------------------------------------------------------------------------------------------------------------------------------------------------------------------------------------------------------------------------------------------------------------------------------------------------------------------------------------------------------------------------|----------------------------------------------------------------------------------------------------------------------------------------------------------------------------------------------------------------------------------------------------|
| 1. Create or join a Dementia Action Alliance (DAA)              | (i)Joined the local DAA, attended regularly by prison staff<br>(ii)Prison-only steering group not set up                                                                                                                                                                                                                                                                                                                           | The prison did not join nor create a DAA or similar                                                                                                                                                                                                |
| 2. Identify a community leader                                  | There was a lead person liaising with the AS rep throughout. This changed several times across the study                                                                                                                                                                                                                                                                                                                           | The identified lead met with the AS rep once, but a dementia friendly community was not worked towards.                                                                                                                                            |
| 3. Have an awareness raising plan                               | (i)Information sessions delivered largely to prisoner peer supporters as part of this research; AS rep delivered further session at a prisoner conference<br>(ii) Two staff members trained as dementia champions enabling them to deliver awareness sessions<br>(iii)Information session placed on staff training rotation, delivered by a staff dementia champion<br>(iv) Awareness raising was a part of the prison action plan | (i)Information sessions delivered to prisoner peer supporters, and some healthcare and prison staff as part of the research<br>(ii) No known ongoing plan to raise dementia awareness at the prison, and no further information sessions delivered |
| 4. Involvement of people living with dementia, and their carers | (i)Prisoner peer supporters were asked for opinions, but project was staff led primarily<br>(ii) Little formal contact between AS rep and prisoners<br>(iii) No known involvement of family or friends of PLWDs                                                                                                                                                                                                                    | Prison not working towards establishing a dementia friendly community within this project, so no prisoner nor family or friends involved.                                                                                                          |
| 5. Publicise the work of the community                          | (i)The dementia action plan was posted on the DAA website<br>(ii) The AS rep was a speaker at a prison-wide conference for prisoner peer supporters<br>(iii) Staff working outside of specialist wings appeared unaware of the project                                                                                                                                                                                             | (i)There was no dementia friendly community plan<br>(ii) A prisoner who attended the information session as part of this research, used the information to create an edition of the in-house prisoner magazine focused on dementia                 |
| 6. Focus the action plans on two or three key priorities        | A dementia action plan was created focused on: raising awareness; improving the physical environment; and working with partners inside and outside the prison                                                                                                                                                                                                                                                                      | No dementia action plan was created                                                                                                                                                                                                                |
| 7. Have a 6-month and annual evaluation plan                    | (i)The prison participated in the research evaluation. The prison was continuing to work with AS and DAA, but unclear about ongoing plans to evaluate                                                                                                                                                                                                                                                                              | The prison participated in the research evaluation – no further evaluation plans                                                                                                                                                                   |

1  
2  
3 Whilst Prison B engaged with some of the initial project-related activities (hosting  
4 information sessions and an initial meeting with an AS representative), there was little  
5 progress beyond this, with few AS criteria met and no DFC plans created. A prisoner at  
6 Prison B did use the information session materials to produce an edition of the prisoner  
7 magazine focused on dementia, and the difficulty of being in prison when family members  
8 are experiencing dementia or supporting others with dementia.  
9  
10  
11  
12  
13  
14  
15  
16  
17  
18  
19  
20  
21

## 22 **RESEARCH QUESTION 2: IMPACT**

23  
24  
25 Within this study, impact was assessed using study specific questionnaires evaluating (i) the  
26 dementia information session delivered at both prisons, (ii) whether DFC aims were met,  
27 and if changes were made by the prison to support these. As no DFC plans were made or  
28 implemented at Prison B, analysis of this questionnaire will only be presented for Prison A.  
29  
30  
31  
32  
33  
34  
35 Quantitative results will also be augmented by interview and focus group analyses.  
36  
37  
38  
39  
40

### 41 *(a) Information session evaluation*

42  
43 Participants completed questionnaires evaluating the information session pre- (n=45) and  
44 post-session (n=40), and at six-months (n=12) and one-year follow-up (n=7). This was also  
45 explored further in interviews and focus groups. Table 2 shows data taken from the  
46 questionnaires across the evaluation period:  
47  
48  
49  
50  
51  
52  
53

54 <Table 2 here>  
55  
56  
57  
58  
59  
60



Table 2: Descriptive statistics and comparative analyses of awareness session questionnaires

|                                                                                                                 | PRE-COMPARISON ANALYSIS                    |                                           |                                            | POST-COMPARISON ANALYSIS                   |                                         | FOLLOW-UP ANALYSIS          |
|-----------------------------------------------------------------------------------------------------------------|--------------------------------------------|-------------------------------------------|--------------------------------------------|--------------------------------------------|-----------------------------------------|-----------------------------|
|                                                                                                                 | Pre-Post<br>(n=38)                         | Pre - 6-mth<br>(n=12)                     | Pre - 1-year<br>(n=7)                      | Post - 6 mth<br>(n=11)                     | Post - 1-year<br>(n=5)                  | 6-mth – 1 year<br>(n=3)     |
| <b>Do you know what dementia is?</b><br>(N° Yes, %; significance level)*                                        | 31(86.1)-36(100)<br>p=0.063<br>2 missing   | n/a                                       | n/a                                        | n/a                                        | n/a                                     | n/a                         |
| <b>How much do you know about dementia?</b><br>(median; significance/level)**                                   | 4 - 7<br>Z=-4.594,<br>p<0.001<br>1 missing | 5 - 6<br>Z=-2.831, p=<br>0.005            | 5 - 6<br>Z=-2.232, p=0.026                 | 7 - 6<br>Z=-1.311, p=0.190                 | 7 - 4<br>Z=0, p=1.000<br>1 missing      | 6 - 4<br>Z=-1.414, p=0.157  |
| <b>Do you know the causes of dementia?</b><br>(N° Yes, %; Significance level)*                                  | 7(25) – 24(85.7)<br>p<0.001<br>10 missing  | n/a                                       | n/a                                        | n/a                                        | n/a                                     | n/a                         |
| <b>Do you know what a dementia friendly community is?</b><br>(N° Yes, %; Significance level)*                   | 13(44.8)-26(89.7)<br>p<0.001<br>9 missing  | 7(70.0) - 9(90.0)<br>p=0.500<br>2 missing | 1(16.7) – 5 (83.3)<br>p=0.125<br>1 missing | 9(90.0) – 8(80.0)<br>p=1.000<br>1 missing  | 3(100) – 3(100)<br>p=1.000<br>2 missing | 3(100)– 3(100)<br>p=1.000   |
| <b>Did the awareness session increase your knowledge/did you learn?</b><br>(No, %; Significance level)*         | n/a                                        | n/a                                       | n/a                                        | 10 (100)– 9 (90.0)<br>p=1.000<br>1 missing | 4 – 4 (100)<br>p=1.000<br>1 missing     | 3(100) – 3 (100)<br>p=1.000 |
| <b>Confidence in talking about dementia to others?</b><br>(median; significance/level)**                        | 5 – 7<br>Z=-3.917,<br>p<0.001<br>8 missing | 5 - 7<br>Z=-0.854,<br>p=0.393             | 5 – 6<br>Z=-1.069, p=0.285<br>3 missing    | 7 - 7<br>Z=-1.897, p=0.058                 | 7 - 6<br>Z=0, p=1.000<br>1 missing      | 7 - 6<br>Z=0, p=1.000       |
| <b>Confidence in helping people living with dementia?</b><br>(median; significance/level)**                     | n/a                                        | n/a                                       | n/a                                        | n/a                                        | n/a                                     | 8 – 7<br>Z=0, p=1.000       |
| <b>Did the awareness session change your views on people with dementia?</b><br>(N° Yes, %; Significance level)* | n/a                                        | n/a                                       | n/a                                        | n/a                                        | n/a                                     | 3 – 3 (100)<br>p=1.000      |

\*Significance testing using exact McNemar's test  
\*\*Significant testing using Wilcoxon signed-rank test

 = statistically significant

1  
2  
3 All of the responses concerning perceived knowledge of dementia increased post-session,  
4 reaching statistical significance for level of knowledge about dementia, its causes and  
5 dementia friendly communities. Participants also reported feeling more confident talking to  
6 people with dementia post-awareness session. At 6-months and one-year follow-up,  
7 participants continued to report that they knew more about dementia than they had pre-  
8 awareness session, differences which were statistically significant. Unsurprisingly, no results  
9 were significant for the three participants sampled at both 6-months and 1-year follow-up.  
10  
11  
12  
13  
14  
15  
16  
17  
18  
19  
20  
21  
22  
23

24 At follow-up, most information session attendees interviewed reported their attendance  
25 positively, with the awareness session reportedly increasing their knowledge and  
26 understanding of dementia, which led to an increase in confidence in interacting with  
27 PLWDs for some:  
28  
29  
30  
31  
32  
33  
34

35 *"I'd never met anyone with dementia before I came into prison you see. I'd only*  
36 *just met X [prisoner] before I come to your group. I was a bit stand offish to him*  
37 *because I didn't really understand his illness... after going to your group, when I*  
38 *interacted with X with what I'd learned about his memory loss, it was a lot easier*  
39 *for me to understand him and I think for him to understand me" (Prisoner)*  
40  
41  
42  
43  
44  
45  
46  
47

48 Some participants also reported that the session altered the way they supported PLWDs,  
49 with a positive knock-on effect on those relationships. There were also reports of  
50 participants finding the information personally comforting and useful in supporting family,  
51 colleagues and community members caring for someone with dementia:  
52  
53  
54  
55  
56  
57  
58  
59  
60

1  
2  
3 *“For me it helped me mostly because my grandad suffers with dementia... for me*  
4  
5 *[the information session] put my mind at ease a lot with that and helped me.*  
6  
7  
8 *And I talked with my mum and my grandma about it a lot more because of that,*  
9  
10 *because I felt a bit more confident having that knowledge” (Prisoner)*  
11  
12  
13  
14  
15

#### 16 (b) *Dementia Friendly Prison Aims*

17  
18 Table 3 shows study participants’ views on whether Prison A met DFC aims at 6 months  
19 (n=15) and 1-year follow-up (n=12), using the DFC aims questionnaire. These were largely  
20  
21 independent samples, therefore a comparative analysis was not possible.  
22  
23  
24  
25

#### 26 **<Table 3 here: Dementia Friendly Prison Aims questionnaire table>**

27  
28  
29  
30 At both six-months and one-year follow-up, the majority of participants reported that  
31  
32 PLWDs did not face stigma and discrimination and were supported to live independently at  
33  
34 the prison. At 6-months, the latter was reported to have improved – the only area in which  
35  
36 participants reported positive change across the study. It is possible that this endorsement  
37  
38 of support for independence reflects the way prisons in general expect prisoners to  
39  
40 function, but in addition, Prison A had adopted a policy of ‘enablement’ at their  
41  
42 establishment, which appears to be compatible with this:  
43  
44  
45  
46  
47  
48  
49  
50

51 *“I’m forever saying ‘enable’, enable as much as possible. Encourage them to*  
52  
53 *clean, encourage them to tidy their cell up... get them doing as much as possible.*  
54  
55 *[PLWD A], for all the will in the world you couldn’t take work away from him, he*  
56  
57 *just wants to do it himself...we’re never going to take that off him” (Prisoner)*  
58  
59  
60

**Table 3: Dementia Friendly Prison Aims and Changes made to Prison A**

| DEMENTIA FRIENDLY PRISON AIMS                             | SIX-MONTH FOLLOW-UP<br>(n=15) |      |                           |      |           |      |           |      | ONE-YEAR FOLLOW-UP<br>(n=12) |      |                               |      |           |      |           |      |
|-----------------------------------------------------------|-------------------------------|------|---------------------------|------|-----------|------|-----------|------|------------------------------|------|-------------------------------|------|-----------|------|-----------|------|
|                                                           | Aims met?                     |      | Change over last 6 months |      |           |      |           |      | Aims met?                    |      | Change over the last 6 months |      |           |      |           |      |
|                                                           |                               |      | For better                |      | No change |      | For worse |      |                              |      | For better                    |      | No change |      | For worse |      |
|                                                           | n                             | %    | N                         | %    | n         | %    | n         | %    | n                            | %    | n                             | %    | n         | %    | N         | %    |
| Views of PLWDs are listened to                            | 5                             | 33.3 | 4                         | 26.7 | 6         | 40   | 3         | 20   | 3                            | 25   | 3                             | 25   | 6         | 50   | 0         | 0    |
| Good understanding of dementia amongst prison staff       | 2                             | 13.3 | 2                         | 13.3 | 10        | 66.7 | 2         | 13.3 | 2                            | 16.7 | 2                             | 16.7 | 4         | 33.3 | 2         | 16.7 |
| Good understanding of dementia amongst prisoners          | 5                             | 33.3 | 5                         | 33.3 | 8         | 53.3 | 1         | 6.7  | 2                            | 16.7 | 3                             | 25   | 4         | 33.3 | 1         | 8.3  |
| Accessible and appropriate prison activities for PLWDs    | 4                             | 26.7 | 1                         | 6.7  | 11        | 73.3 | 2         | 13.3 | 3                            | 25   | 0                             | 0    | 7         | 58.3 | 1         | 8.3  |
| PLWDs are made to feel they can contribute to prison life | 4                             | 26.7 | 3                         | 20   | 8         | 53.3 | 3         | 20   | 3                            | 25   | 0                             | 0    | 7         | 58.3 | 1         | 8.3  |
| Staff pick up and act upon early signs of dementia        | 2                             | 13.3 | 4                         | 26.7 | 8         | 53.3 | 1         | 6.7  | 2                            | 16.7 | 1                             | 8.3  | 6         | 50   | 1         | 8.3  |
| PLWDs can engage fully in prison life                     | 6                             | 40.0 | 4                         | 26.7 | 8         | 53.3 | 1         | 6.7  | 4                            | 33.3 | 1                             | 8.3  | 7         | 58.3 | 0         | 0    |
| PLWDS supported to live as independently as possible      | 10                            | 66.7 | 6                         | 40   | 4         | 26.7 | 3         | 20   | 10                           | 83.3 | 3                             | 25   | 6         | 50   | 0         | 0    |
| The prison is easy to get around for PLWDs                | 4                             | 26.7 | 1                         | 6.7  | 8         | 53.3 | 3         | 20.0 | 4                            | 33.3 | 0                             | 0    | 7         | 58.3 | 1         | 8.3  |
| PLWDs are respected                                       | 4                             | 26.7 | 1                         | 6.7  | 9         | 60   | 4         | 26.7 | 5                            | 41.7 | 1                             | 8.3  | 6         | 50   | 1         | 8.3  |
| PLWDs face stigma and discrimination here                 | 4                             | 26.7 | 3                         | 20.0 | 8         | 53.3 | 2         | 13.3 | 4                            | 33.3 | 1                             | 8.3  | 6         | 50   | 1         | 8.3  |

1  
2  
3 Regarding the other DFC aims, only around a third or less of participants agreed that they  
4 had been met. This included two foci of Prison A's DFC action plan: ease of navigation and  
5 understanding and identifying symptoms of dementia, particularly amongst staff. Whilst on  
6 the one hand this may represent a lack of observable progress in these areas, it may also  
7 reflect that the dementia-focused work at Prison A was largely implemented across two  
8 older prisoner wings rather than prison-wide. This was indicated by staff participants who  
9 worked on mainstream wings reporting that they were unaware of the DFC project, and also  
10 by prisoner observation:  
11  
12  
13  
14  
15  
16  
17  
18  
19  
20  
21  
22  
23  
24  
25  
26  
27  
28  
29  
30  
31  
32  
33  
34  
35  
36  
37

*"I think those that work specifically on [older prisoner wings], I think they're  
becoming more aware. But as the others, they got a very mixed bag. A very  
mixed bag" (Prisoner)*

### **RESEARCH QUESTION 3: CONTEXTUAL FACTORS**

38 Both prisons described DFC principles as applicable in a prison setting, although they  
39 differed in the extent to which they engaged with the intervention, and in their 'dementia  
40 friendliness'. An analysis of staff and prisoner interviews and focus group discussion  
41 highlighted elements of the prison context which could act as barriers or facilitators to the  
42 implementation of DFC principles, were related to: (i) the institution and environment, (ii)  
43 staff, (iii) prisoners, (iv) prison culture (policies, practices and beliefs) and (v) external  
44 factors. These are depicted in Figure 3 with apposite quotations, and are discussed further  
45 below.  
46  
47  
48  
49  
50  
51  
52  
53  
54  
55  
56  
57  
58  
59  
60

**<Figure 3: Barrier and Facilitators>***(i) Institution and Environment*

Prison budget cuts and bureaucracy were reported to impact engagement with DFC principles. Among staff, there was discussion about the need to balance resources available with the need for additional dementia input. The larger number of older prisoners and relative stability of the prisoner population at prison A justified greater engagement with the project (although this fluctuated according to numbers of prisoners with a dementia diagnosis). At prison B, staff shortages were a more prominent theme, and staff reported that the lower numbers of older prisoners and the amount of prisoner turnover could not justify continued engagement – mental health problems and substance misuse were clearer priorities. Staff leads at this prison also reported that they felt their support of PLWDs was good enough already.

Overall, staff and prisoner opinion of the dementia friendliness of both of the prisons was more mixed. Specialist wings were mostly considered more suitable for PLWDs than mainstream wings, being characterised as safer and less isolating, with more relaxed rules and routines including unlocking prisoners during the day, and greater on-wing activities including a cognitive stimulation group at Prison B – although these were considered too few for some. At prison A there were opportunities for prisoners to socialise off-wing and a prison-wide unlocked policy for prisoners, with some prison-wide older prisoner-focused activities at both prisons (such as additional gym and library access), although again these

1  
2  
3 were considered to be too few, and less accessible for those on one specialist wing at prison  
4  
5  
6 B. However, operation of these altered regimes and activities were reportedly affected by  
7  
8 resource and staff shortages, and subject to restriction at both prisons.  
9

10  
11  
12  
13  
14  
15 The environments of the specialist wings had had some adaptations for older prisoners (for  
16  
17 example, stair lifts, painted areas, and quiet spaces at Prison A, and a more normalised  
18  
19 dining area at Prison B). These wings were also reportedly easier to navigate and more  
20  
21 comfortable than mainstream wings. However, it was widely agreed that these wings fell  
22  
23 short of dementia friendliness (for example, cell doors not wide enough for wheelchairs at  
24  
25 prison A, and lack of stair lifts in one prison B specialist wing), as did the overall prison  
26  
27 environments which were reportedly confusing to get around - a 'concrete city'.  
28  
29  
30  
31  
32  
33  
34  
35

36 (ii) Staff  
37  
38

39 There were mixed reports from prisoners and staff on prison- and healthcare staff support  
40  
41 for PLWDs. Prison staff regularly working on specialist wings were described as more  
42  
43 dementia aware and supportive of PLWDs, than staff working on mainstream wings.  
44  
45  
46 However, there were reports from some staff and prisoners, that staff who did not want to  
47  
48 work on specialist wings sometimes acted their frustration out on prisoners when placed  
49  
50 there.  
51  
52  
53  
54  
55  
56  
57  
58  
59  
60

1  
2  
3 The presence of 24-hour healthcare staff at prison B and the introduction of social care at  
4 prison A were considered a potential benefit to PLWDs – although there were no reports of  
5 social care working with PLWDs at either prison. There were mostly positive reports of  
6 healthcare staff at Prison A, and mental health, wellbeing and specialist wing staff at Prison  
7 B. However, there was some concern expressed about the more ‘security’ focused  
8 operation of the healthcare wing and staff at prison B which would not appear to be  
9 conducive to supporting PLWDs. Lead staff at prison B were unequivocally positive about all  
10 aspects of healthcare provision. In addition, some participants suggested that healthcare  
11 staff seemed reluctant to make dementia diagnoses – with reports of prisoners with  
12 dementia symptoms outstripping numbers diagnosed. As well as this affecting the  
13 treatment of individual prisoners, this would also impact prison decisions about engaging  
14 with dementia-related interventions, as numbers justify resources.

### 36 (iii) Prisoners

37  
38  
39 Participants reported that whilst the experiences of PLWDs at both prisons may vary, it was  
40 likely to be confusing or frightening. Prisoners providing care support for PLWDs (such as  
41 orderlies) were considered vital at Prison A – possibly as a result of less healthcare staff  
42 cover. Both prisons employed prisoner peer supporters in various capacities, although the  
43 numbers were seen as too few by most staff and prisoners, with training, support and  
44 guidance particularly around dementia mostly reported as inadequate, and a lack of formal  
45 contracts making the roles unclear at prison A. It is of note that healthcare professionals  
46 working alongside orderlies on one of the specialist wings at prison B, were reported as  
47 offering good informal support.



1  
2  
3  
4  
5  
6  
7 (iv) Prison Culture  
8  
9

10 There were a number of aspects of prison policy, practice and culture which appeared to be  
11 compatible with DFC principles. These included *safety, security and decency* as guiding  
12 operating goals; *equality* in the application of rules; *equivalence* of care and support  
13 between prisons and the community; and at Prison A *enablement* – maximising the  
14 independence of PLWDs. However, it seemed that some of these were applied patchily or  
15 too rigidly at times to be supportive. For example, instances of prioritising *security* over  
16 healthcare (such as when hospital appointments are missed), an expectation that all  
17 prisoners conform to rules *equally* irrespective of cognitive capacity, an overestimation of  
18 prisoners' abilities leading to a lack of support rather than *enablement*, and lack of *decency*  
19 in not offering through-the-night continence care.  
20  
21  
22  
23  
24  
25  
26  
27  
28  
29  
30  
31  
32  
33  
34  
35  
36  
37

38 Other aspects of prison culture that could affect the management and support of PLWDs as  
39 well as the likelihood of prisoners seeking help reported by both staff and prisoners,  
40 included conflicts around how the *punishment* of prison was perceived, between being sent  
41 to prison as punishment or for punishment; perceptions of prisoners as *malingering* or  
42 *manipulative*; a '*macho*' or *tough* culture; *bullying and exploitation* (although only a couple  
43 of instances were reported); and *stigma* particularly around being old - possibly affecting  
44 prisoners choice to move to specialist accommodation and staff desire to work with this  
45 group. It is also of note that the unequal *power* relationships and hierarchical nature of  
46 prisons suffuses all of these cultural elements. For example, fear of censure reportedly  
47  
48  
49  
50  
51  
52  
53  
54  
55  
56  
57  
58  
59  
60

1  
2  
3 resulted in the reluctance of some prisoner peer supporters advocating for PLWDs, and for  
4  
5 more junior staff to challenge practice.  
6  
7  
8  
9  
10

11  
12 *(v) External Factors – family/friends and central government*  
13  
14

15 There were a couple of examples of liaison between prison staff and family members  
16  
17 (mostly when they were dying or had died), family visits facilitated in quiet spaces, and the  
18 involvement of a charity that facilitated family connections at both prisons. However, there  
19  
20 appeared to be a lack of systematic prison practice to maintain links between family and  
21  
22 PLWDs with reports of: some prisoners risking punishment to help PLWDs make telephone  
23  
24 calls; no apparent mechanism for family and friends to report concerns, or to input to  
25  
26 assessments or support; and no support for family members in coping with the difficulty of  
27  
28 having a family member in prison and living with dementia.  
29  
30  
31  
32  
33  
34  
35  
36  
37  
38

39 Central governments' austerity-driven cuts were reported to impact the whole prison  
40  
41 system in myriad ways, some of which have already been documented. In addition, the lack  
42  
43 of policy and strategy attention for PLWDs affects the amount to which prisons struggling  
44  
45 with implementing mandatory operations and training can attend to that which is not  
46  
47 mandated. This can render the status of additional dementia input as optional, or a "luxury"  
48  
49  
50  
51 (Staff).  
52  
53  
54  
55  
56  
57  
58  
59  
60

## DISCUSSION

### *Summary of results*

Both of the participating prisons reported that DFC principles were applicable to them, but differed in the extent to which they engaged with the intervention. Dementia information sessions were delivered at both, and reportedly increased participants' knowledge, confidence, and understanding of dementia, consistent with community DFC evaluations.[24-30] Prison A created and implemented a DFC action plan, facilitated additional awareness raising initiatives, small environmental changes, and reportedly helped PLWDs to live more independently – but, progress was considered slow and partial, and was mostly focused on older prisoner wings. Prison B did not create nor implement a DFC action plan. Facilitators and barriers for the implementation of DFC principles within a prison context largely flowed from where PLWDs chose to reside, with older prisoner-focused wings considered more dementia friendly, with more aware staff and prisoner peer supporters. Austerity-related cuts to prison budgets presented one of the biggest barriers to implementation and to decisions to engage in the intervention – which was also driven by numbers of older prisoners and PLWDs. Aspects of the prison culture appeared to have the potential to both support and undermine interventions focused on PLWDs.

### *Study strengths and limitations*

Study strengths and limitations divide into those related to the fidelity of the intervention at Prison A, and those related to the running of the evaluation at both prisons.

### *Intervention*

Although most of the AS intervention criteria were met, one of the key DFC principles proved challenging: involving PLWDs (although this was also a difficulty for community interventions).[24-30] Within this study, this was mostly due to fluctuating numbers of prisoners formally diagnosed with dementia, which also affected the evaluation.

Additionally, DFC plans were largely created by the prison lead alone, but a steering group including PLWDs and their supporters including family members, as well as staff from across the prison, could help to establish and maintain a prison DFC more consistent with Alzheimer's Society central tenets. The Alzheimer's Society did not 'train' prisoners as Dementia Champions as part of this project. Overcoming bureaucratic obstacles to doing so within the organisation and the prison would also be more compatible with DFC principles.

### *Evaluation*

This was the first published evaluation of the Government-endorsed DFC approach to prisons, and as a small-scale study was essentially exploratory. The PPI/E phase of the study proved valuable in targeting the work, and ensuring materials were workable, although an expanded role for prisoner involvement in design, recruitment and execution would have been desirable. The sample size for the information session evaluation was relatively small, and significantly reduced across the follow-up period affecting sub-group analyses, as did the lack of socio-demographic data. A 'traditional' one-year follow-up study of a prison-based intervention may be impossible on a small-scale due to prisoner and staff turnover – larger sample sizes, or briefer follow-up periods may be more feasible.

### ***Implications and recommendations***

The biggest challenge to the implementation of DFC principles in both prisons seemed to come from the significantly reduced budgets allocated since 2010, resulting in a quarter of the prison workforce being cut[40-41] and contributing to record levels of prisoner violence and self-harm.[42-45] As older prisoners typically pose less problems in these areas and reoffend less than their younger counterparts,[46-49] their difficulties are in danger of going unrecognised, underscored by the Government's repeated refusal to create a strategy focused on older prisoners.[16, 50-55]. In addition, the use of early release for prisoners is very limited. It is against this backdrop that a situation has emerged where interventions targeting prisoners with dementia, some of the most vulnerable prisoners in the system, can be described as unjustified rather than a moral, ethical and legal necessity. At present, it appears that it may only be prisons with very large numbers of older prisoners that can justify it.

Centralised resources and strategy are fundamental in the early release of PLWDs, in guiding and funding better health and social care coverage, and in creating more appropriate social and physical environments for PLWDs. However, there were a number of aspects of prison practice and policy identified more locally that could facilitate dementia friendly prison practice, some of which could be co-designed and delivered with external organisations:

- Partial segregation of older prisoners on specialist wings that are 'opt-in' for both prisoners and staff, with opportunities to leave the wing to mix with other prisoners and access activities and services if desired, appears to be advantageous.[56-57] A

1  
2  
3 more comprehensive programme of on-wing activities and groups, such as cognitive  
4 stimulation and reminiscence groups, and the adoption of an enablement ethos  
5  
6 with specialist training and supervision for both wing staff and prisoner peer  
7  
8 supporters (with formal contracts) may also be helpful[54].  
9  
10

- 11  
12  
13 • Dementia information sessions to be made available to the wider prison population  
14 via prisoner forums and rep meetings and placed on the staff training rotation, or  
15 delivered in chunks around officer schedules (such as at registration). These could  
16 include a reflection of the impact of the prison and its culture on PLWDs, and  
17 examples of good prison dementia practice derived from the work of prisoners and  
18 staff on the specialist wings and delivered by staff or prisoner Dementia Champions.  
19  
20  
21  
22  
23  
24  
25  
26  
27  
28 • Policies for older prisoners and those with disabilities (including PLWDs) across  
29 prisons which allow them to be unlocked through the day, paid a wage  
30 commensurate with their working peers, and access to appropriate activities – this  
31 could be through attendance at a centre for groups and activities.  
32  
33  
34  
35  
36  
37  
38 • A focus on improving environments by making use of in-house expertise, labour,  
39 and adapting simple DFC design.[58-60]  
40  
41  
42  
43 • Access to specialist dementia training and support for healthcare staff where  
44 needed, with a clear referral pathway to specialist dementia services in the  
45 community. Also, as dementia has been linked to a number of other health issues  
46 such as depression, high blood pressure, smoking, poor nutrition and physical and  
47 social inactivity, dementia awareness could be included as part of broader health  
48 and social wellbeing promotion activities at prisons, including those with lower  
49 numbers of older prisoners.  
50  
51  
52  
53  
54  
55  
56  
57  
58  
59  
60

- Review and translate local policies, practices and procedures for older prisoners, including disciplinary procedures regarding PLWDs. For example, decency (how to care for incontinence through the night) and safety (appropriate use of control and restraint techniques for older people). These could be disseminated through staff training sessions which could also challenge more problematic aspects of prison culture as it pertains to PLWDs, including age-related stigma, bullying, and malingering assumptions which has also been linked to prison suicide.[61]
- To systematically support the links between PLWDs and family more in line with NICE guidelines [62] prisons (with external partners) could: assist telephone calls, facilitate visits in quiet spaces, support older visitors with difficulty travelling, increase liaison between family/friends and the prison regarding reporting concerns and in the assessment and support of PLWDs, and support family and friends in coping with the distress of having a loved one in prison with dementia.

### ***Future research***

This was a pilot study that produced some promising findings, which warrants further investigation, such as a more robust evaluation with a larger sample size, across a variety of prisons, for longer periods. Exploring the intersectionality of other protected characteristics (for example gender and ethnicity) with age and dementia, will be particularly important to ensure the community is applicable for all.

1  
2  
3 The role of prisoner peer supporters for PLWDs appeared to be key in this study, and as to  
4  
5 date there have been no published evaluations of their work, additional study would be  
6  
7 valuable.[63] There is a particular lack of research focused on PLWDs worldwide, so further  
8  
9 research on their experiences whilst in prison and upon resettlement in the community,  
10  
11 thought to be particularly challenging[64], and the best ways to support them, would likely  
12  
13 be useful to prison practitioners, researchers and policy makers.  
14  
15  
16  
17  
18  
19  
20

## 21 FOOTNOTES

22  
23 <sup>1</sup> *The age cut-off for 'older prisoner' varies, but is typically thought to be 10 years younger*  
24  
25 *than the general population, as prisoners have been reported to age more rapidly due to*  
26  
27 *lifestyle, healthcare access, substance misuse, and the stress of imprisonment (see [65] for*  
28  
29 *further discussion)*  
30  
31

32  
33 <sup>2</sup> *Local prisons serve the courts local to the prison, holding prisoners on remand, those*  
34  
35 *-serving shorter sentences and those serving longer sentences awaiting allocation to another*  
36  
37 *prison.*  
38  
39

40  
41  
42 <sup>3</sup> *Organisations join local Dementia Action Alliances to "share best practice and take action*  
43  
44 *on dementia" [66]*  
45  
46

47 <sup>4</sup>*anonymised to preserve confidentiality*  
48  
49  
50  
51

## 52 AUTHOR CONTRIBUTIONS

53  
54  
55 **Samantha Treacy** – design of study materials; facilitated focus groups and conducted  
56  
57 interviews; led qualitative analysis, and conducted quantitative analyses; drafted the  
58  
59 manuscript as lead author.  
60



1  
2  
3 **Anna Haggith** – involvement with project conception and design; liaison with project  
4  
5 partners; co-designed study materials; facilitated PPI/E, awareness sessions, interviews and  
6  
7 focus groups; conducted qualitative analysis; contributed comments to manuscript drafts.  
8  
9

10  
11 **Nuwan Darshana Wickramasinghe** – conducted quantitative analysis and qualitative  
12  
13 analyses; edits to manuscript drafts.  
14  
15

16  
17 **Tine Van Bortel** – Principle Investigator: conceived of and designed the study and grant  
18  
19 proposal; oversaw and advised on all aspects of the study; design of study materials; liaison  
20  
21 with project partners; contributed comments and edits to manuscript drafts.  
22  
23  
24  
25  
26  
27

## 28 **ACKNOWLEDGEMENTS**

29

30  
31 We would like to thank the prisoners and staff of both prisons who participated in the study,  
32  
33 the prisoners who helped us with project design and materials, the Governors of both  
34  
35 prisons for their permission to conduct the study, and Her Majesty's Prison and Probation  
36  
37 Service, particularly Rupert Bailie, for permission and support. We would also like to thank  
38  
39 the Alzheimer's Society, particularly the representatives working with the prisons, and Laura  
40  
41 Meadowcraft, Caroline Lee and Natalie Mann for contributing towards the  
42  
43  
44  
45  
46  
47  
48  
49  
50  
51  
52  
53  
54  
55  
56  
57  
58  
59  
60  
conceptualisation of the initial proposal and its facilitation.

**FUNDING**

This work was funded by the Department of Health and Social Care's National Institute for Health Research, Collaboration for Leadership for Applied Health Research and Care, East of England.

**DISCLAIMER**

The views expressed are those of the authors and not necessarily those of the NHS, the NIHR or the Department of Health and Social Care, nor of Her Majesty's Prison and Probation Service.

**COMPETING INTERESTS**

None declared.

**PATIENT CONSENT**

Not required.

1  
2  
3 **ETHICS APPROVAL**  
4

5  
6 Ethical approval for the study was granted by Anglia Ruskin University, with further  
7  
8 permission obtained from the National Offender Management Service (NOMS), and the  
9  
10  
11  
12  
13  
14  
15  
16  
17  
18  
19  
20  
21  
22  
23  
24  
25  
26  
27  
28  
29  
30  
31  
32  
33  
34  
35  
36  
37  
38  
39  
40  
41  
42  
43  
44  
45  
46  
47  
48  
49  
50  
51  
52  
53  
54  
55  
56  
57  
58  
59  
60  
Governors of each participating prison.

18 **PROVENANCE AND PEER REVIEW**  
19

20  
21 Not commissioned, externally peer reviewed.  
22  
23  
24  
25  
26  
27  
28  
29  
30  
31  
32  
33  
34  
35  
36  
37  
38  
39  
40  
41  
42  
43  
44  
45  
46  
47  
48  
49  
50  
51  
52  
53  
54  
55  
56  
57  
58  
59  
60

28 **DATA SHARING STATEMENT**  
29

30  
31 Additional data available on request from study authors.  
32  
33  
34  
35  
36  
37  
38  
39  
40  
41  
42  
43  
44  
45  
46  
47  
48  
49  
50  
51  
52  
53  
54  
55  
56  
57  
58  
59  
60

## REFERENCES

1  
2  
3  
4  
5  
6  
7  
8 1 Ministry of Justice. Prison population: 31 March 2018. London: Ministry of Justice, 2018.

9  
10 [https://www.gov.uk/government/statistics/offender-management-statistics-quarterly-](https://www.gov.uk/government/statistics/offender-management-statistics-quarterly-october-to-december-2017)  
11  
12 [october-to-december-2017](https://www.gov.uk/government/statistics/offender-management-statistics-quarterly-october-to-december-2017) (accessed 06 December 2018).

13  
14  
15  
16  
17 2 Allen G, Watson C. UK prison population statistics. House of Commons Library briefing  
18  
19 paper. London: House of Commons Library, 2017.

20  
21  
22  
23  
24  
25  
26 3 Ministry of Justice. Prison population projections 2017 to 2022, England and Wales.  
27  
28 London: Ministry of Justice, 2017.

29  
30  
31 [https://www.gov.uk/government/uploads/system/uploads/attachment\\_data/file/639801/p](https://www.gov.uk/government/uploads/system/uploads/attachment_data/file/639801/prison-population-projections-2017-2022.pdf)  
32  
33 [rison-population-projections-2017-2022.pdf](https://www.gov.uk/government/uploads/system/uploads/attachment_data/file/639801/prison-population-projections-2017-2022.pdf) (accessed 06 December 2018).

34  
35  
36  
37  
38 4 Di Lorito C, Völlm B, Dening T. Psychiatric disorders among older prisoners: a systematic  
39  
40 review and comparison study against older people in the community. *Aging Ment Health*  
41  
42 2018;22(1):1-10 doi:10.1080/13607863.2017.1286453 [published Online First 12 March  
43  
44 2017].

45  
46  
47  
48  
49  
50 5 Moll A. Losing track of time: Dementia and the ageing prison population. London: Mental  
51  
52 Health Foundation, 2013. [https://www.mentalhealth.org.uk/sites/default/files/losing-track-](https://www.mentalhealth.org.uk/sites/default/files/losing-track-of-time-2013.pdf)  
53  
54 [of-time-2013.pdf](https://www.mentalhealth.org.uk/sites/default/files/losing-track-of-time-2013.pdf) (accessed 06 December 2018).

1  
2  
3 6 Senior P, Forsyth K, Walsh E, et al. Health and social care services for older male adults in  
4  
5  
6  
7  
8  
9  
10  
11  
12  
13  
14  
15  
16  
17  
18  
19  
20  
21  
22  
23  
24  
25  
26  
27  
28  
29  
30  
31  
32  
33  
34  
35  
36  
37  
38  
39  
40  
41  
42  
43  
44  
45  
46  
47  
48  
49  
50  
51  
52  
53  
54  
55  
56  
57  
58  
59  
60

6 Senior P, Forsyth K, Walsh E, et al. Health and social care services for older male adults in prison: the identification of current service provision and piloting of an assessment and care planning model. Health Services and Delivery Research. Southampton: National Institute for Health Research, 2013.

[https://www.ncbi.nlm.nih.gov/books/NBK259270/pdf/Bookshelf\\_NBK259270.pdf](https://www.ncbi.nlm.nih.gov/books/NBK259270/pdf/Bookshelf_NBK259270.pdf) (accessed 06 December 2018).

7 Hayes AJ, Burns A, Turnbull P, et al. Social and custodial needs of older adults in prisons. *Age Ageing* 2013;42(5):589-93. doi:10.1093/ageing/aft066 [published Online First: 21 June 2013].

8 Hayes A, Burns A, Turnbull P, et al. The health and social needs of older male prisoners. *Int J Geriatr Psychiatry* 2012;27(11):1155-62 doi:10.1002/gps.3761 [published Online First: 05 March 2012].

9 Combalbert N, Pennequin V, Ferrand C, et al. Cognitive impairment, self-perceived health and quality of life of older prisoners. *Crim Behav Ment Health* 2018;28(1):36-49 doi: 10.1002/cbm.2023 [published Online First: 10 March 2017].

10 Cipriani G, Carlesi C, Danti S, et al. Old and dangerous: Prison and dementia. *J Forensic Leg Med* 2017;51:40-44 doi: 10.1016/j.jflm.2017.07.004 [published Online First: 28 July 2017].

1  
2  
3 11 Lee C, Haggith A, Mann N, et al. Older prisoners and the Care Act 2014: An examination  
4 of policy, practice and models of social care delivery. *Prison Serv J* 2016;224:35-41.  
5  
6  
7

8  
9  
10 12 Maschi T, Kwak J, Ko E, et al. Forget me not: dementia in prison. *Gerontologist*  
11 2012;52(4):441-451 doi:10.1093/geront/gnr131 [published Online First: 11 January 2012].  
12  
13  
14

15  
16  
17 13 Gaston S. Vulnerable prisoners: Dementia and the impact on prisoners, staff and the  
18 correctional setting. *Collegian* 2018;25:241-46 doi:10.1016/j.colegn.2017.05.004 [published  
19  
20  
21  
22  
23  
24  
25  
26  
27  
28  
29  
30  
31  
32  
33  
34  
35  
36  
37  
38  
39  
40  
41  
42  
43  
44  
45  
46  
47  
48  
49  
50  
51  
52  
53  
54  
55  
56  
57  
58  
59  
60

13 du Toit, SHJ, McGrath M. Dementia in prisons – enabling better care practices for those  
ageing in correctional facilities. *Br J Occup Ther* Published Online First: 19 December 2017.  
doi: 10.1177/0308022617744509

15 Feczko A. Dementia in the incarcerated elderly adult: innovative solutions to promote  
quality care. *J Am Assoc Nurse Pract* 2014;26(12):640-8 doi: 10.1002/2327-6924.12189  
[published Online First: 12 November 2018].

16 Justice Committee. Older prisoners: Fifth report of session 2013-14. London: House of  
Commons, 2013. [https://www.parliament.uk/documents/commons-  
committees/justice/older-prisoners.pdf](https://www.parliament.uk/documents/commons-committees/justice/older-prisoners.pdf) (accessed 06 December 2018).

17 Christodoulou M. Locked up and at risk of dementia. *Lancet Neurol* 2012;11(9):750-1 doi:  
10.1016/S1474-4422(12)70195-3 [published Online First: 18 August 2012].

1  
2  
3  
4  
5  
6 18 Department of Health. The future organisation of prison health care. London:

7  
8 Department of Health, 1999.

9  
10 [http://webarchive.nationalarchives.gov.uk/20110504020423/http://www.dh.gov.uk/prod\\_c](http://webarchive.nationalarchives.gov.uk/20110504020423/http://www.dh.gov.uk/prod_c)  
11  
12 [onsum\\_dh/groups/dh\\_digitalassets/@dh/@en/documents/digitalasset/dh\\_4106031.pdf](http://www.dh.gov.uk/prod_consum_dh/groups/dh_digitalassets/@dh/@en/documents/digitalasset/dh_4106031.pdf)

13  
14  
15 (accessed 06 December 2018).

16  
17  
18  
19  
20 19 Care Act. UK: The Stationary Office, 2014.

21  
22 <http://www.legislation.gov.uk/ukpga/2014/23/contents/enacted> (accessed 06 December  
23  
24 2018).

25  
26  
27  
28  
29 20 Health and Social Care Committee. Prison health. London: House of Commons, 2018.

30  
31 <https://publications.parliament.uk/pa/cm201719/cmselect/cmhealth/963/963.pdf>

32  
33  
34 (accessed on 06 December 2018).

35  
36  
37  
38  
39 21 Department of Health. Prime Minister's challenge on dementia 2020. London:

40  
41 Department of Health, 2015.

42  
43 [https://www.gov.uk/government/uploads/system/uploads/attachment\\_data/file/414344/p](https://www.gov.uk/government/uploads/system/uploads/attachment_data/file/414344/p)  
44  
45 [m-dementia2020.pdf](https://www.gov.uk/government/uploads/system/uploads/attachment_data/file/414344/p) (accessed 06 December 2018).

46  
47  
48  
49  
50  
51 22 Department of Health. Prime Minister's challenge on dementia: Delivering major  
52  
53 improvements in dementia care and research by 2015. London: Department of Health,  
54  
55  
56 2012.

1  
2  
3 [https://www.gov.uk/government/uploads/system/uploads/attachment\\_data/file/215101/dh\\_133176.pdf](https://www.gov.uk/government/uploads/system/uploads/attachment_data/file/215101/dh_133176.pdf) (accessed 06 December 2018).

10 23 Alzheimer's Society. Guidance for communities registering for the recognition process for dementia friendly communities. London: Alzheimer's Society, 2013.

15 [https://www.alzheimers.org.uk/sites/default/files/2018-06/DFC%20Recognition%20process%20-%20Guidance%20for%20communities\\_FS%20albert\\_4.pdf](https://www.alzheimers.org.uk/sites/default/files/2018-06/DFC%20Recognition%20process%20-%20Guidance%20for%20communities_FS%20albert_4.pdf) (accessed 06 December 2018).

24 Dean J, Silverside K, Crampton J, et al. Evaluation of the Bradford Dementia Friendly Communities Programme. York: Joseph Rowntree Foundation, 2015.

30 <https://www.jrf.org.uk/report/evaluation-bradford-dementia-friendly-communities-programme> (accessed 06 December 2018).

37 25 Dean J, Silverside K, Crampton J, et al. Evaluation of the York Dementia Friendly Communities Programme. York: Joseph Rowntree Foundation, 2015.

42 <https://www.jrf.org.uk/report/evaluation-york-dementia-friendly-communities-programme> (accessed 06 December 2018).

50 26 Henderson J. Dementia friendly communities: Edinburgh City initiatives 2014-2015.

52 Edinburgh: Faith in Older People, 2015.

54 [http://evaluationsupportscotland.org.uk/media/uploads/resources/dementia\\_friendly\\_edinburgh\\_final.pdf](http://evaluationsupportscotland.org.uk/media/uploads/resources/dementia_friendly_edinburgh_final.pdf) (accessed 06 December 2018).



1  
2  
3 27 Seydak E, Holmes M, Lynch S, et al. Building a Dementia Friendly Community in Northern  
4 Ireland: Learning from the DEED Project in Derry. York: Joseph Rowntree Foundation, 2015.

5  
6  
7  
8 [https://www.jrf.org.uk/report/building-dementia-friendly-community-northern-ireland-](https://www.jrf.org.uk/report/building-dementia-friendly-community-northern-ireland-learning-deed-project-derry)  
9  
10 [learning-deed-project-derry](https://www.jrf.org.uk/report/building-dementia-friendly-community-northern-ireland-learning-deed-project-derry) (accessed 06 December 2018).

11  
12  
13  
14  
15 28 Oxford Brookes University. Evaluation of Hampshire Dementia Friendly Communities:  
16 Final Report. Oxford: Oxford Brookes University, 2015.

17  
18  
19  
20 [https://ipc.brookes.ac.uk/publications/publication\\_814.html](https://ipc.brookes.ac.uk/publications/publication_814.html) (accessed 06 December 2018).

21  
22  
23  
24  
25 29 Oxford Brookes University. Oxford Dementia Challenge Group: Evaluation of Dementia  
26 Friendly Communities Project. Oxford: Oxford Brookes University, 2014.

27  
28  
29  
30 [https://ipc.brookes.ac.uk/publications/Oxfordshire Dementia Friendly Communities evalu-](https://ipc.brookes.ac.uk/publications/Oxfordshire_Dementia_Friendly_Communities_evaluation_-_August_2014.pdf)  
31  
32 [ation - August 2014.pdf](https://ipc.brookes.ac.uk/publications/Oxfordshire_Dementia_Friendly_Communities_evaluation_-_August_2014.pdf) (accessed 06 December 2018).

33  
34  
35  
36  
37 30 Innes A, Cutler C, Heward M, et al. Dorset Dementia Friendly Communities Project: Final  
38 Evaluation Report (June 2014). Bournemouth: Bournemouth University, 2014.

39  
40  
41  
42  
43  
44 31 Roberts SK. Aging in prison: Reducing elder incarceration and promoting public safety.  
45 New York: Columbia University, 2015.

46  
47  
48  
49 [http://centerforjustice.columbia.edu/files/2015/10/AgingInPrison\\_FINAL\\_web.pdf](http://centerforjustice.columbia.edu/files/2015/10/AgingInPrison_FINAL_web.pdf)  
50  
51 (accessed 06 December 2018).

52  
53  
54  
55  
56 32 Baldwin J, Leete J. Behind bars: the challenge of an ageing prison population. *Australian*  
57 *Journal of Dementia Care* 2012;1(2):16-19.  
58  
59  
60

1  
2  
3  
4  
5  
6 33 Human Rights Watch. Old behind bars: The aging prison population in the United States.

7  
8 New York: Human Rights Watch, 2012. [https://www.hrw.org/report/2012/01/27/old-](https://www.hrw.org/report/2012/01/27/old-behind-bars/aging-prison-population-united-states)  
9  
10 [behind-bars/aging-prison-population-united-states](https://www.hrw.org/report/2012/01/27/old-behind-bars/aging-prison-population-united-states) (accessed 06 December 2018).

11  
12  
13  
14  
15 34 Fazel S, McMillan J, O'Donnell I. Dementia in prison: ethical and legal implications. *J Med*  
16  
17 *Ethics* 2002;28(3):156-159 doi:10.1136/jme.28.3.156

18  
19  
20  
21  
22  
23 35 Her Majesty's Inspectorate of Prisons. HMP [Prison A<sup>4</sup>]. 2015. London: Her Majesty's  
24  
25 Inspectorate of Prisons.

26  
27  
28  
29  
30 36 Her Majesty's Inspectorate of Prisons. HMP [Prison B<sup>4</sup>]. 2016. London: Her Majesty's  
31  
32 Inspectorate of Prisons.

33  
34  
35  
36  
37 37 Alzheimer's Society. Foundation criteria for the dementia-friendly communities  
38  
39 recognition process. London: Alzheimer's Society, 2014.  
40  
41 [https://www.alzheimers.org.uk/sites/default/files/2018-](https://www.alzheimers.org.uk/sites/default/files/2018-06/DFC%20Foundation%20criteria_Fs%20Albert_4.pdf)  
42  
43 [06/DFC%20Foundation%20criteria\\_Fs%20Albert\\_4.pdf](https://www.alzheimers.org.uk/sites/default/files/2018-06/DFC%20Foundation%20criteria_Fs%20Albert_4.pdf) (accessed 06 December 2018).

44  
45  
46  
47  
48  
49 38 University of Salford. Dementia Friendly Physical Environments Checklist. Salford,  
50  
51 University of Salford. 2013.  
52  
53 [http://www.dementiaaction.org.uk/assets/0000/4336/dementia\\_friendly\\_environments\\_ch](http://www.dementiaaction.org.uk/assets/0000/4336/dementia_friendly_environments_checklist.pdf)  
54  
55 [ecklist.pdf](http://www.dementiaaction.org.uk/assets/0000/4336/dementia_friendly_environments_checklist.pdf) (accessed 06 December 2018).

1  
2  
3 39 Gale NK, Heath G, Cameron E, et al. Using the framework method for the analysis of  
4 qualitative data in multi-disciplinary health research. *BMC Med Res Methodol*  
5  
6 2013;13(1):117 doi:10.1186/1471-2288-13-117  
7  
8  
9

10  
11  
12  
13 40 Ministry of Justice. Her Majesty's Prison and Probation Service (HMPPS) workforce  
14 quarterly: June 2017. London: Ministry of Justice, 2017.  
15  
16 [https://www.gov.uk/government/statistics/her-majestys-prison-and-probation-service-](https://www.gov.uk/government/statistics/her-majestys-prison-and-probation-service-workforce-quarterly-june-2017)  
17 [workforce-quarterly-june-2017](https://www.gov.uk/government/statistics/her-majestys-prison-and-probation-service-workforce-quarterly-june-2017) (accessed 06 December 2018).  
18  
19  
20  
21  
22

23  
24  
25 41 Prison Reform Trust. Prison: the facts. Bromley briefings, Summer 2018. London: Prison  
26 Reform Trust, 2018.  
27  
28 [http://www.prisonreformtrust.org.uk/Portals/0/Documents/Bromley%20Briefings/Summer](http://www.prisonreformtrust.org.uk/Portals/0/Documents/Bromley%20Briefings/Summer%202018%20factfile.pdf)  
29 [%202018%20factfile.pdf](http://www.prisonreformtrust.org.uk/Portals/0/Documents/Bromley%20Briefings/Summer%202018%20factfile.pdf) (accessed 06 December 2018).  
30  
31  
32  
33

34  
35  
36  
37 42 Ministry of Justice. Safety in custody quarterly bulletin: December 2017. London:  
38 Ministry of Justice, 2018. [https://www.gov.uk/government/statistics/safety-in-custody-](https://www.gov.uk/government/statistics/safety-in-custody-quarterly-update-to-december-2017)  
39 [quarterly-update-to-december-2017](https://www.gov.uk/government/statistics/safety-in-custody-quarterly-update-to-december-2017) (accessed 06 December 2018).  
40  
41  
42  
43  
44

45  
46  
47 43 Ministry of Justice. Prison Safety and Reform. London: Ministry of Justice, 2016.  
48 [https://www.gov.uk/government/uploads/system/uploads/attachment\\_data/file/565014/c](https://www.gov.uk/government/uploads/system/uploads/attachment_data/file/565014/cm-9350-prison-safety-and-reform-web.pdf)  
49 [m-9350-prison-safety-and-reform- web .pdf](https://www.gov.uk/government/uploads/system/uploads/attachment_data/file/565014/cm-9350-prison-safety-and-reform-web.pdf) (accessed 06 December 2018).  
50  
51  
52  
53

54  
55  
56  
57 44 Beard J, Allen G. Prison safety in England and Wales. House of Commons Library briefing  
58 paper. London: House of Commons Library, 2017.  
59  
60

1  
2  
3 <https://researchbriefings.parliament.uk/ResearchBriefing/Summary/CBP-7467> (accessed 06  
4  
5  
6 December 2018).

7  
8  
9  
10 45 Her Majesty's Inspectorate of Prisons. Annual report 2016-17. London: Her Majesty's  
11  
12 Inspectorate of Prisons, 2017. [http://www.justiceinspectors.gov.uk/hmiprisons/wp-](http://www.justiceinspectors.gov.uk/hmiprisons/wp-content/uploads/sites/4/2017/07/HMIP-AR_2016-17_CONTENT_11-07-17-WEB.pdf)  
13  
14 [content/uploads/sites/4/2017/07/HMIP-AR\\_2016-17\\_CONTENT\\_11-07-17-WEB.pdf](http://www.justiceinspectors.gov.uk/hmiprisons/wp-content/uploads/sites/4/2017/07/HMIP-AR_2016-17_CONTENT_11-07-17-WEB.pdf)  
15  
16  
17 (accessed 06 December 2018).

18  
19  
20  
21  
22 46 Her Majesty's Inspectorate of Prisons. 'No problems – old and quiet': Older prisoners in  
23  
24 England and Wales. London: Her Majesty's Inspectorate of Prisons, 2004.  
25  
26  
27 [https://www.justiceinspectors.gov.uk/hmiprisons/wp-](https://www.justiceinspectors.gov.uk/hmiprisons/wp-content/uploads/sites/4/2014/08/OlderPrisoners-2004.pdf)  
28  
29 [content/uploads/sites/4/2014/08/OlderPrisoners-2004.pdf](https://www.justiceinspectors.gov.uk/hmiprisons/wp-content/uploads/sites/4/2014/08/OlderPrisoners-2004.pdf) (accessed 06 December 2018).

30  
31  
32  
33  
34 47 Brunton-Smith I, Hopkins K. The factors associated with proven re-offending following  
35  
36 release from prison: findings from waves 1 to 3 of SPCR – Results from the Surveying  
37  
38 Prisoner Crime Reduction (SPCR) longitudinal cohort study of prisoners. Ministry of Justice  
39  
40 Analytical Series. London: Ministry of Justice, 2013.  
41  
42  
43 [https://www.gov.uk/government/uploads/system/uploads/attachment\\_data/file/491119/r](https://www.gov.uk/government/uploads/system/uploads/attachment_data/file/491119/re-offending-release-waves-1-3-spcr-findings.pdf)  
44  
45 [e-offending-release-waves-1-3-spcr-findings.pdf](https://www.gov.uk/government/uploads/system/uploads/attachment_data/file/491119/re-offending-release-waves-1-3-spcr-findings.pdf) (accessed 06 December 2018).

46  
47  
48  
49  
50  
51 48 Omolade S. The needs and characteristics of older prisoners: Results from the Surveying  
52  
53 Prisoner Crime Reduction (SPCR) survey. Ministry of Justice analytical summary. London:  
54  
55  
56  
57 Ministry of Justice, 2014.  
58  
59  
60

1  
2  
3 [https://www.gov.uk/government/uploads/system/uploads/attachment\\_data/file/368177/n](https://www.gov.uk/government/uploads/system/uploads/attachment_data/file/368177/n)  
4  
5 [eeds-older-prisoners-spcr-survey.pdf](https://www.gov.uk/government/uploads/system/uploads/attachment_data/file/368177/n) (accessed 06 December 2018).  
6  
7  
8  
9

10 49 Ministry of Justice. Proven reoffending tables (3 monthly), April 2016 to June 2016.  
11  
12 London: Ministry of Justice, 2018. [https://www.gov.uk/government/statistics/proven-](https://www.gov.uk/government/statistics/proven-reoffending-statistics-april-2016-to-june-2016)  
13 [reoffending-statistics-april-2016-to-june-2016](https://www.gov.uk/government/statistics/proven-reoffending-statistics-april-2016-to-june-2016) (accessed 06 December 2018).  
14  
15  
16  
17  
18  
19

20 50 House of Commons Committee of Public Accounts. Mental health in prisons: Eighth  
21  
22 report of session 2017-19. London: House of Commons, 2017.  
23  
24 <https://publications.parliament.uk/pa/cm201719/cmselect/cmpubacc/400/400.pdf>  
25  
26 (accessed 06 December 2018).  
27  
28  
29  
30  
31

32 51 Her Majesty's Inspectorate of Prisons. Annual report 2015-16. London: Her Majesty's  
33  
34 Inspectorate of Prisons, 2016. [https://www.justiceinspectores.gov.uk/hmiprison/wp-](https://www.justiceinspectores.gov.uk/hmiprison/wp-content/uploads/sites/4/2016/07/HMIP-AR_2015-16_web.pdf)  
35 [content/uploads/sites/4/2016/07/HMIP-AR\\_2015-16\\_web.pdf](https://www.justiceinspectores.gov.uk/hmiprison/wp-content/uploads/sites/4/2016/07/HMIP-AR_2015-16_web.pdf) (accessed 06 December  
36  
37  
38  
39  
40  
41  
42  
43  
44  
45  
46  
47  
48  
49  
50  
51  
52  
53  
54  
55  
56  
57  
58  
59  
60

52 Prisons & Probation Ombudsman. Learning lessons bulletin: Dementia. London: Prisons &  
53  
54 Probation Ombudsman, 2016. [http://www.ppo.gov.uk/app/uploads/2016/07/PPO-](http://www.ppo.gov.uk/app/uploads/2016/07/PPO-Learning-Lessons-Bulletins_fatal-incident-investigations_issue-11_Dementia_WEB_Final.pdf)  
55 [Learning-Lessons-Bulletins\\_fatal-incident-investigations\\_issue-11\\_Dementia\\_WEB\\_Final.pdf](http://www.ppo.gov.uk/app/uploads/2016/07/PPO-Learning-Lessons-Bulletins_fatal-incident-investigations_issue-11_Dementia_WEB_Final.pdf)  
56  
57 (accessed 06 December 2018).  
58  
59  
60

53 Prisons & Probation Ombudsman. Learning from PPO investigations: Older prisoners.  
54  
55 London: Prisons & Probation Ombudsman, 2017. <http://www.ppo.gov.uk/wp->  
56  
57  
58  
59  
60

1  
2  
3 [content/uploads/2017/06/6-3460\\_PPO\\_Older-Prisoners\\_WEB.pdf](content/uploads/2017/06/6-3460_PPO_Older-Prisoners_WEB.pdf) (accessed 06 December  
4  
5 2018).

6  
7  
8  
9  
10 54 Cornish N, Edgar K, Hewson A, et al. Social care or systemic neglect? Older people on  
11  
12 release from prison. London: Prison Reform Trust, 2016.

13  
14  
15 <http://www.prisonreformtrust.org.uk/Portals/0/Documents/Older-prisoner->  
16  
17 [resettlement.pdf](http://www.prisonreformtrust.org.uk/Portals/0/Documents/Older-prisoner-) (accessed 06 December 2018).

18  
19  
20  
21  
22 55 Ministry of Justice. Government response to the Justice Committee's fifth report of  
23  
24 session 2013-14: 'Older Prisoners'. London: Ministry of Justice, 2014.

25  
26  
27 [https://www.gov.uk/government/uploads/system/uploads/attachment\\_data/file/256609/r](https://www.gov.uk/government/uploads/system/uploads/attachment_data/file/256609/r)  
28  
29 [esponse-older-prisoners.pdf](https://www.gov.uk/government/uploads/system/uploads/attachment_data/file/256609/r) (accessed 06 December 2018).

30  
31  
32  
33  
34 56 Wangmo T, Handtke V, Bretschneider W, et al. Prisons should mirror society: the debate  
35  
36 on age-segregated housing for older prisoners. *Ageing & Society* 2017;37(4):675-694 doi:  
37  
38 10.1017/S 0144686X15001373 [published Online First: 09 December 2015].

39  
40  
41  
42  
43 57 Kerbs JJ, Jolley JM, Kanaboshi N. The interplay between law and social science in the age  
44  
45 segregation debate. *J Crime Justice* 2015;38(1):77-95 doi: 10.1080/0735648X.2014.894856  
46  
47 [published Online First: 26 Mar 2014].

48  
49  
50  
51  
52 58 Alzheimer's Society. Making Your Home Dementia Friendly. London: Alzheimer's Society,  
53  
54 2015. <https://www.alzheimers.org.uk/get-support/making-your-home-dementia-friendly>  
55  
56  
57  
58 (accessed 06 December 2018).  
59  
60

1  
2  
3  
4  
5  
6 59 The King's Fund. Developing supportive design for people with dementia: The King's Fund  
7  
8 Enhancing the Healing Environment Programme 2009-2012. London: The King's Fund, 2013.

9  
10 <https://www.kingsfund.org.uk/publications/developing-supportive-design-people-dementia>

11  
12  
13 (accessed 06 December 2018).

14  
15  
16  
17  
18 60 The King's Fund. Environments for care at end of life: The King's Fund Enhancing the  
19  
20 Healing Environment Programme 2008-2010. London: The King's Fund, 2011.

21  
22 <https://www.kingsfund.org.uk/publications/environments-care-end-life> (accessed 06

23  
24  
25 December 2018).

26  
27  
28  
29  
30 61 The Howard League for Penal Reform. Preventing prison suicides: Perspectives from the  
31  
32 inside. London: The Howard League for Penal Reform, 2016. [https://howardleague.org/wp-](https://howardleague.org/wp-content/uploads/2016/05/Preventing-prison-suicide.pdf)  
33  
34 [content/uploads/2016/05/Preventing-prison-suicide.pdf](https://howardleague.org/wp-content/uploads/2016/05/Preventing-prison-suicide.pdf) (accessed 06 December 2018).

35  
36  
37  
38  
39  
40 62 National Institute for Health and Care Excellence. Dementia: assessment, management  
41  
42 and support for people living with dementia and their carers. London: National Institute for  
43  
44 Health and Care Excellence, 2018.

45  
46  
47 <https://www.nice.org.uk/guidance/ng97/chapter/Recommendations#supporting-carers>

48  
49  
50 (accessed 06 December 2018).

51  
52  
53  
54 63 Stewart W, Edmond SW. Prisoner peer caregiving: a literature review. *Nursing Standard*  
55  
56 2017;31(32):44-51 doi: 10.7748/ns.2017.e10468 [published Online First 06 April 2017].  
57  
58  
59  
60

1  
2  
3 64 Dillon G, Vinter LP, Winder B, Finch L. 'The guy might not even be able to remember why  
4 he's here and what he's in for and why he's locked in': residents and staff experiences of  
5 living and working alongside people with dementia who are serving prison sentences for a  
6 sexual offence. *Psychol Crime Law* 2018;1-18. doi: 10.1080/1068316X.2018.1535063  
7  
8 [published Online First 17 October 2018].  
9  
10  
11  
12  
13  
14  
15  
16  
17

18 65 Williams BA, Stern, MF, Mellow J, et al. Aging in correctional custody: Setting a policy  
19 agenda for older prisoner health care. *Am J Public Health* 2012;102(8),1475-1481  
20 doi:10.2105/AJPH.2012.300704 [published Online First: 11 July 2012].  
21  
22  
23  
24  
25  
26  
27

28 66 Dementia Action Alliance. Dementia Action Alliance: About. 2018.  
29  
30 [https://www.dementiaaction.org.uk/who we are](https://www.dementiaaction.org.uk/who_we_are) (accessed 06 December 2018).  
31  
32  
33  
34  
35  
36  
37  
38  
39  
40  
41  
42  
43  
44  
45  
46  
47  
48  
49  
50  
51  
52  
53  
54  
55  
56  
57  
58  
59  
60



1  
2  
3  
4  
5  
6  
7  
8  
9  
10  
11  
12  
13  
14  
15  
16  
17  
18  
19  
20  
21  
22  
23  
24  
25  
26  
27  
28  
29  
30  
31  
32  
33  
34  
35  
36  
37  
38  
39  
40  
41  
42  
43  
44  
45  
46  
47  
48  
49  
50  
51  
52  
53  
54  
55  
56  
57  
58  
59  
60

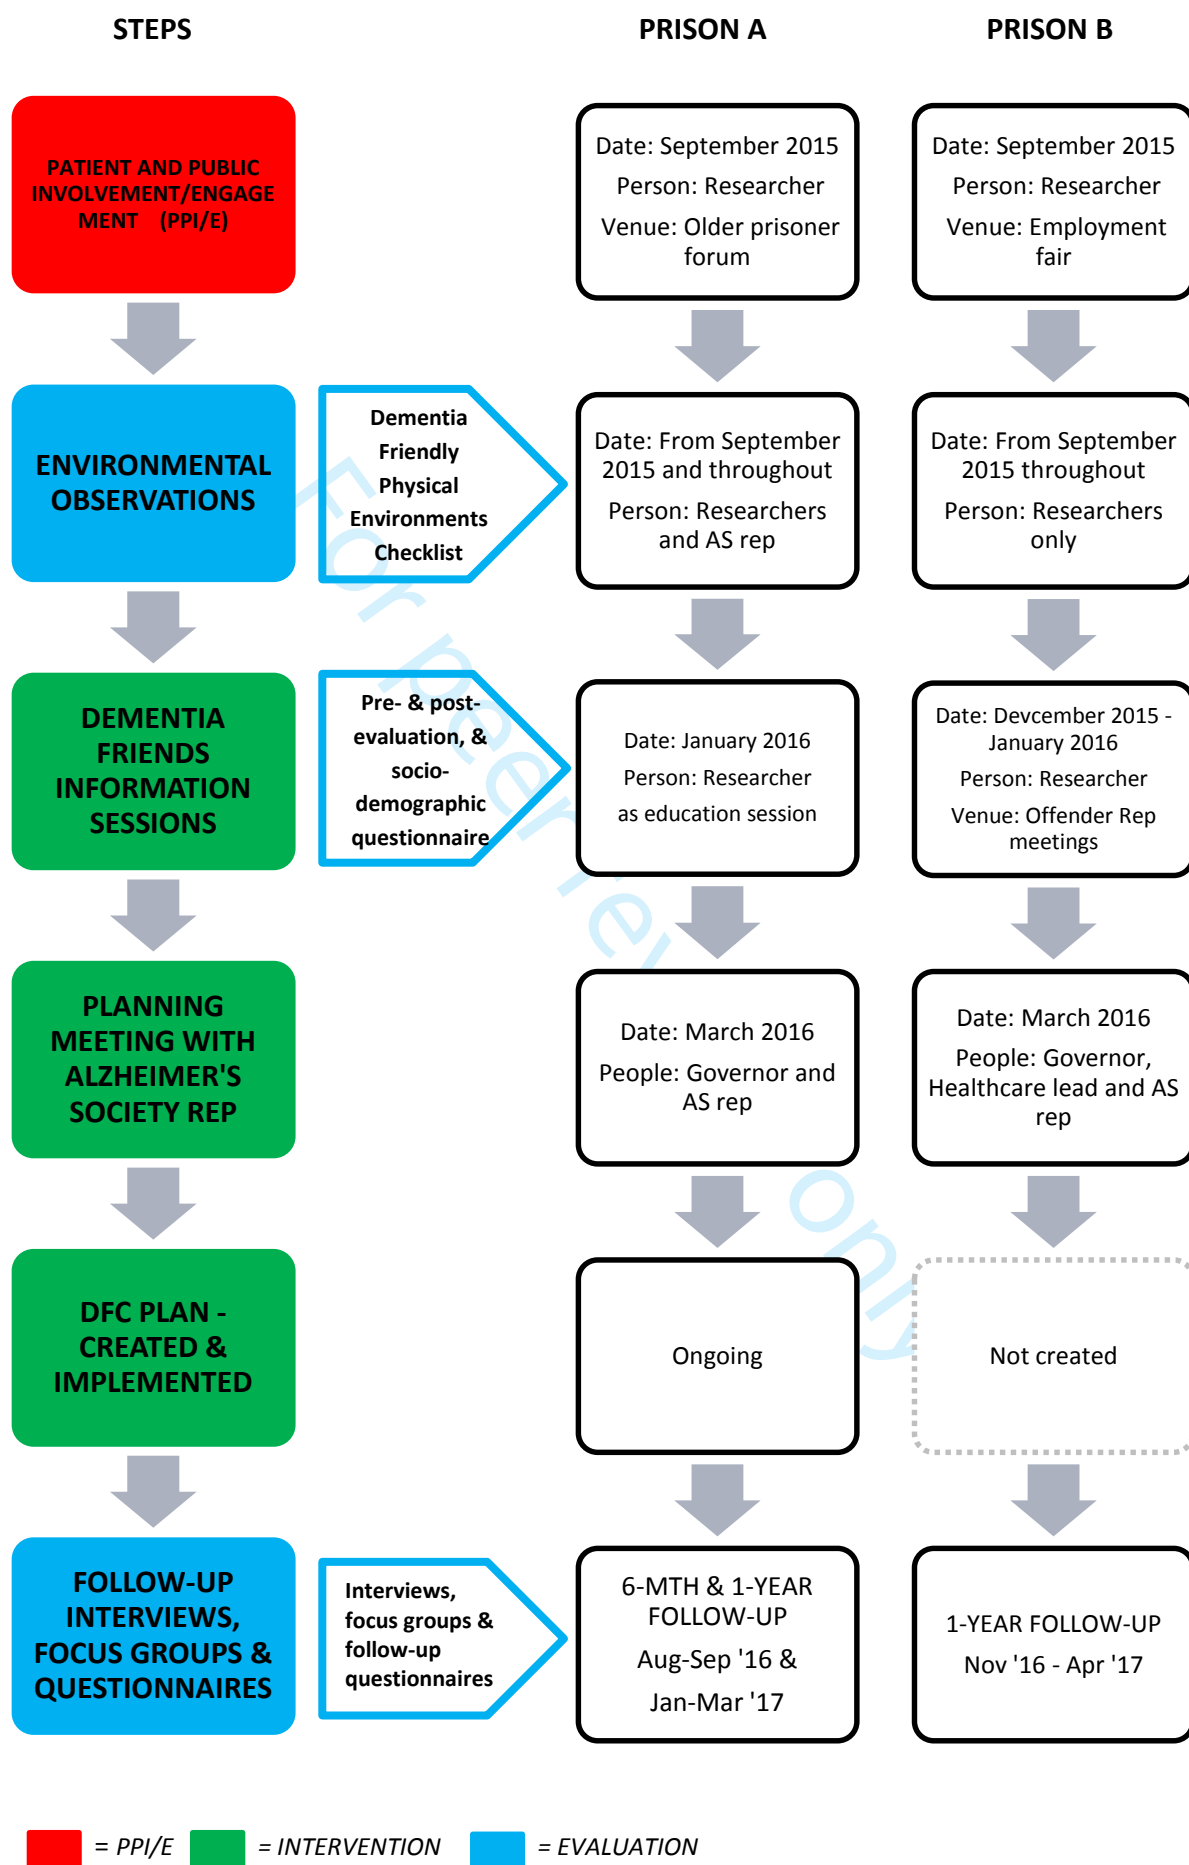

**Figure 1: Steps involved in the implementation and evaluation of DFC principles**

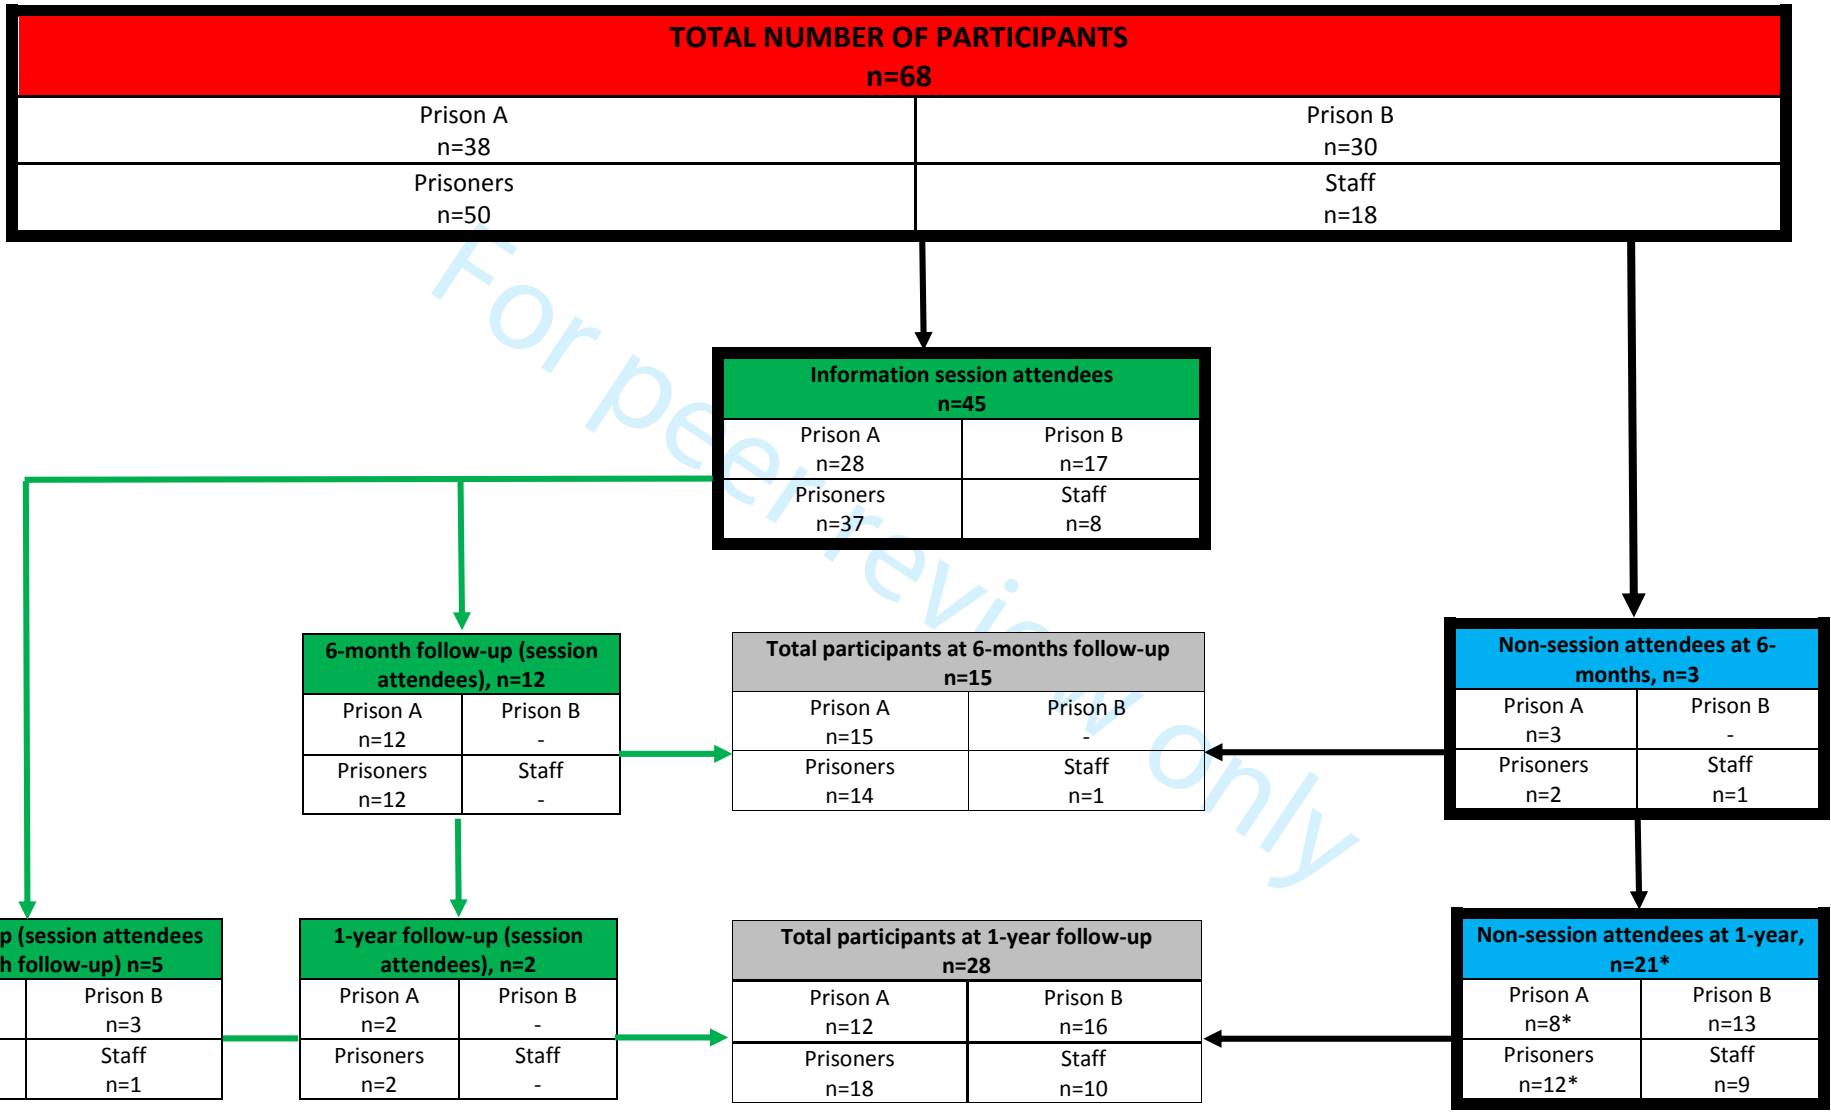

**Figure 2:** Flow of participants through the study

\* One prisoner from Prison A did not attend the information session, but was involved at both 6-month and 1-year follow-up

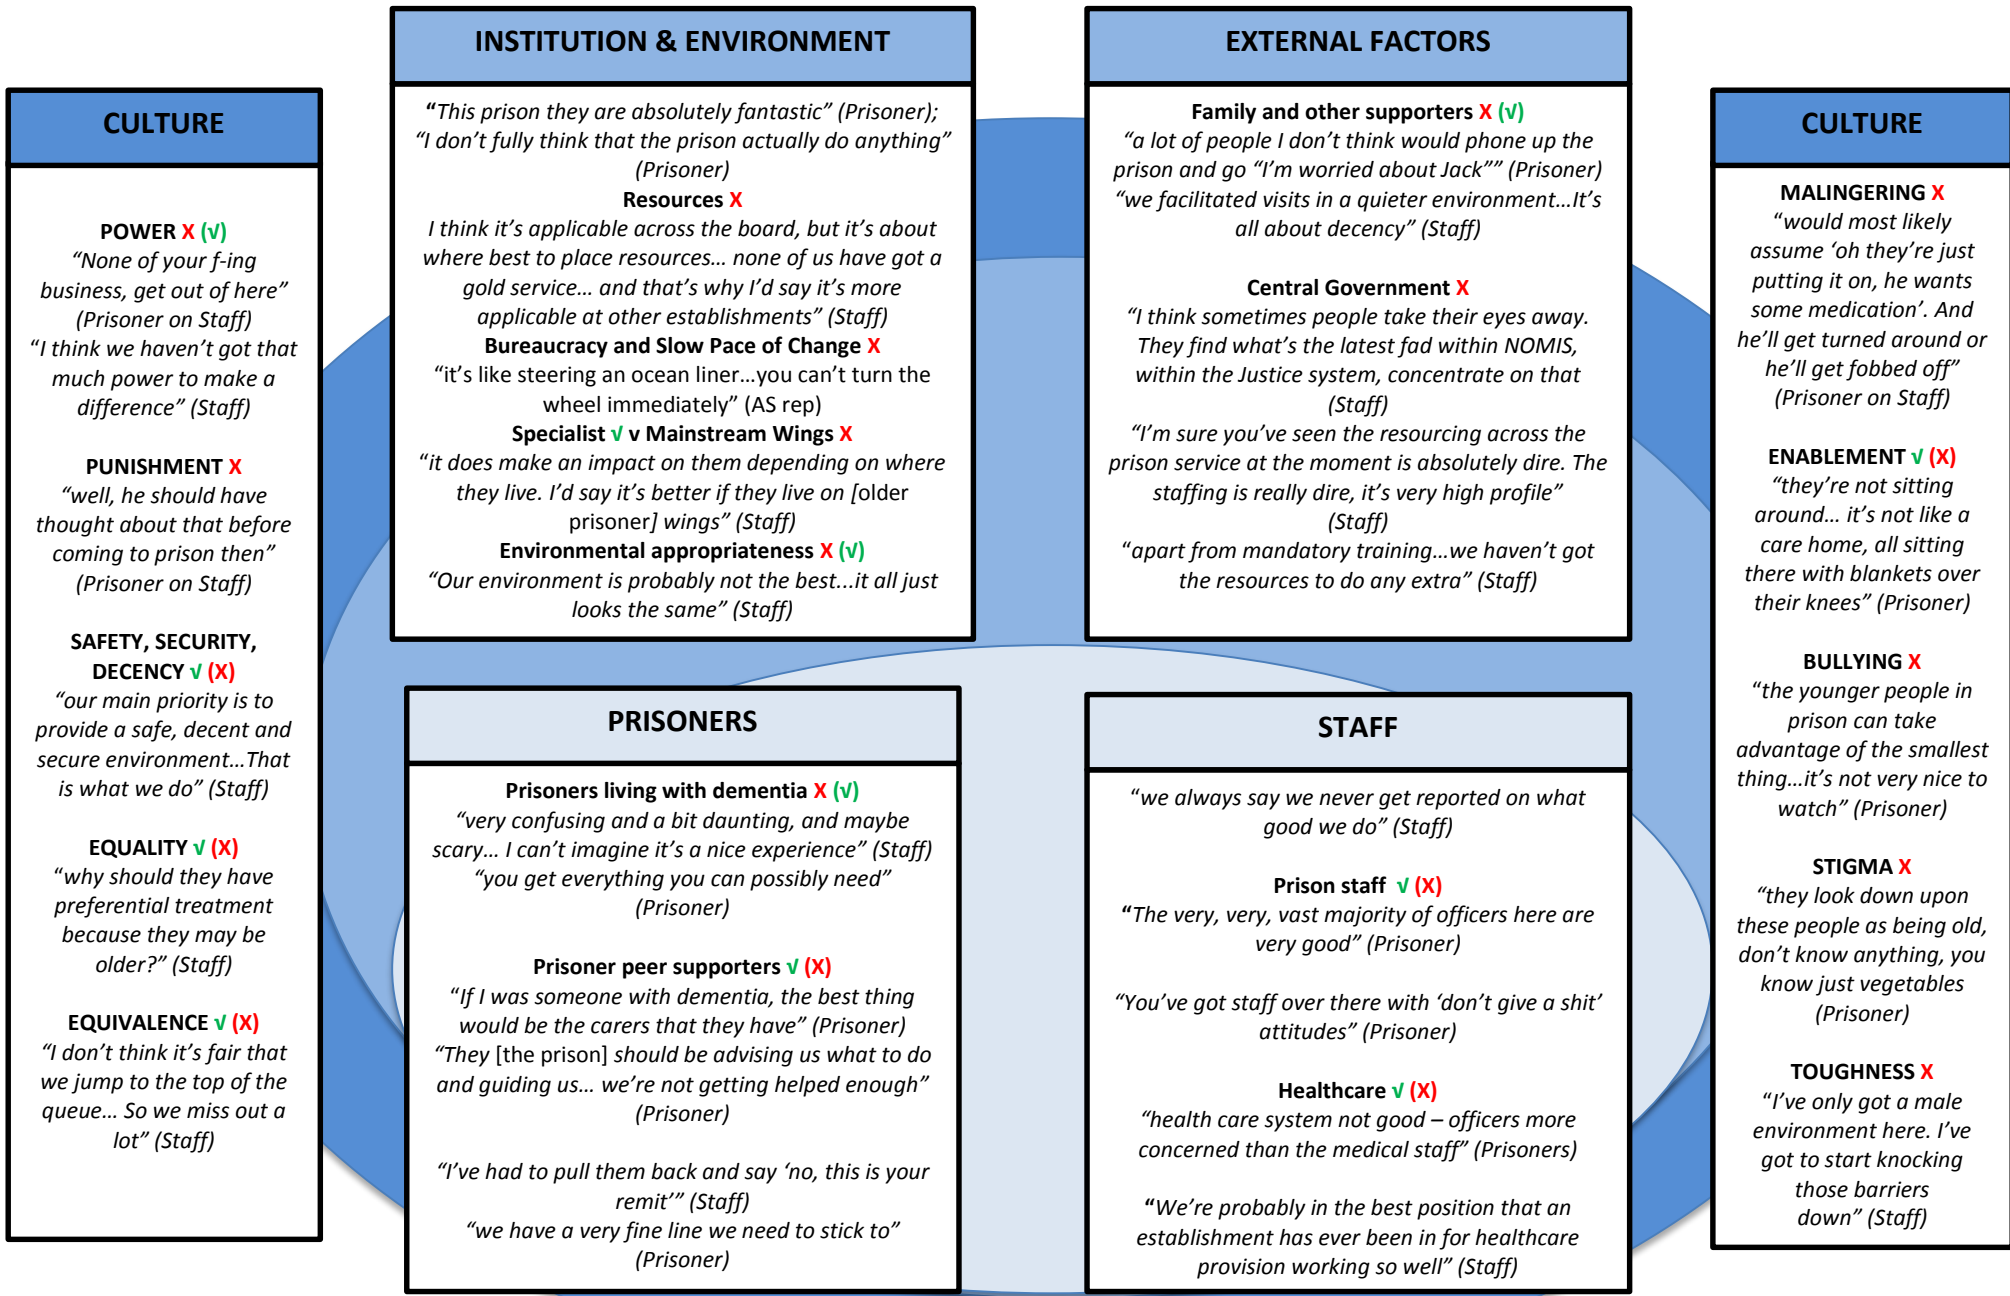

Figure 3: Barriers (X) and Facilitators (v) to applying Dementia Friendly Community principles, and their interactions

# BMJ Open

## Dementia Friendly Prisons - a mixed methods evaluation of the application of dementia friendly community principles to two prisons in England

|                                 |                                                                                                                                                                                                                                                                                                                                                                                                                                                                                                     |
|---------------------------------|-----------------------------------------------------------------------------------------------------------------------------------------------------------------------------------------------------------------------------------------------------------------------------------------------------------------------------------------------------------------------------------------------------------------------------------------------------------------------------------------------------|
| Journal:                        | <i>BMJ Open</i>                                                                                                                                                                                                                                                                                                                                                                                                                                                                                     |
| Manuscript ID                   | bmjopen-2019-030087.R1                                                                                                                                                                                                                                                                                                                                                                                                                                                                              |
| Article Type:                   | Research                                                                                                                                                                                                                                                                                                                                                                                                                                                                                            |
| Date Submitted by the Author:   | 09-May-2019                                                                                                                                                                                                                                                                                                                                                                                                                                                                                         |
| Complete List of Authors:       | Treacy, Samantha; University of Cambridge Department of Public Health and Primary Care, Cambridge Institute of Public Health<br>Haggith, Anna; University of Cambridge, Cambridge Institute of Public Health<br>Wickramasinghe, Nuwan; University of Cambridge, Cambridge Institute of Public Health; Rajarata University of Sri Lanka Faculty of Medicine and Allied Sciences, Department of Community Medicine<br>Van Bortel, Tine; University of Cambridge, Cambridge Institute of Public Health |
| <b>Primary Subject Heading</b>: | Public health                                                                                                                                                                                                                                                                                                                                                                                                                                                                                       |
| Secondary Subject Heading:      | Mental health                                                                                                                                                                                                                                                                                                                                                                                                                                                                                       |
| Keywords:                       | Prisoner health, Older prisoners, Peer support, Environment, Awareness raising, Dementia < NEUROLOGY                                                                                                                                                                                                                                                                                                                                                                                                |
|                                 |                                                                                                                                                                                                                                                                                                                                                                                                                                                                                                     |

SCHOLARONE™  
Manuscripts

1  
2  
3 1 **Dementia Friendly Prisons - a mixed methods evaluation of the application of dementia**  
4  
5  
6 2 **friendly community principles to two prisons in England**  
7  
8

9 3

10  
11  
12 4 **\*Samantha Treacy**, Cambridge Institute of Public Health, University of Cambridge, School of  
13  
14  
15 5 Clinical Medicine, Cambridge Biomedical Campus, Forvie Site, Robinson Way, Cambridge  
16  
17 6 CB2 0SR, UK; [st617@medschl.cam.ac.uk](mailto:st617@medschl.cam.ac.uk); Tel No: +44 1223 330321  
18  
19

20 7

21  
22 8 **Anna Haggith**, Cambridge Institute of Public Health, University of Cambridge, UK  
23  
24

25 9

26  
27 10 **Dr Nuwan Darshana Wickramasinghe**, Cambridge Institute of Public Health, University of  
28  
29 11 Cambridge, UK; Department of Community Medicine, Rajarata University of Sri Lanka, Sri  
30  
31 12 Lanka  
32  
33

34 13

35  
36 14 **Dr Tine Van Bortel**, Cambridge Institute of Public Health, University of Cambridge, UK  
37  
38  
39

40 15

41  
42 16

43  
44 17

45  
46 18

47  
48  
49 19 Word Count 4,886

50  
51 20 \*Corresponding author  
52  
53

54 21

55  
56 22

57  
58 23

59  
60

**ABSTRACT**

**Objectives:** To apply and evaluate dementia friendly community (DFC) principles in prisons.

**Design:** A pilot study and process evaluation using mixed methods, with a one-year follow-up evaluation period.

**Setting:** Two male prisons: a Category C sex offender prison (prison A), and a local prison (prison B).

**Participants:** 68 participants - 50 prisoners, 18 staff

**Intervention:** The delivery of dementia information sessions, and the formulation and implementation of dementia friendly prison action plans.

**Measures:** Study-specific questionnaires; Alzheimer's Society DFC criteria; semi-structured interview and focus group schedules.

**Results:** Both prisons hosted dementia information sessions which resulted in statistically significant ( $p > 0.05$ ) increases in attendees' dementia knowledge, sustained across the follow-up period. Only prison A formulated and implemented a dementia action plan, although a Prison B prisoner dedicated the prisoner magazine to dementia, post-information session. Prison A participants reported some progress on awareness raising, environmental change and support to prisoners with dementia in maintaining independence. The meeting of other dementia friendly aims was less apparent. Numbers of older prisoners, and those diagnosed with dementia appeared to have the greatest impact on engagement with dementia friendly community principles, as did the existence of specialist wings for older prisoners or those with additional care needs. Other barriers and

1  
2  
3 1 facilitators included aspects of the prison institution and environment, staff teams,  
4  
5  
6 2 prisoners, prison culture and external factors.  
7  
8  
9 3 **Conclusions:** DFC principles appear to be acceptable to prisons with some promising  
10  
11 4 progress and results found. However, a lack of Government funding and strategy to focus  
12  
13 5 action around the escalating numbers of older prisoners and those living with dementia  
14  
15 6 appears to contribute to a context where interventions targeted at this highly vulnerable  
16  
17 7 group can be deprioritised. A more robust evaluation of this intervention on a larger scale  
18  
19 8 over a longer period of time would be useful to assess its utility further.  
20  
21  
22  
23  
24  
25  
26  
27  
28  
29  
30  
31  
32  
33  
34  
35  
36  
37  
38  
39  
40  
41  
42  
43  
44  
45  
46  
47  
48  
49  
50  
51  
52  
53  
54  
55  
56  
57  
58  
59  
60

## ARTICLE SUMMARY

### Strengths and limitations of this study

- This is the first study published exploring the applicability of dementia friendly community principles in prisons that we have found, and is one of the only studies published worldwide to evaluate the support and/or management of prisoners living with dementia.
- The PPI/E component of the study was invaluable in establishing the need for dementia-focused work, targeting the intervention and preparing study materials
- Involving people with dementia and their families in the intervention was particularly difficult to achieve in a prison context.
- The relatively small sample size coupled with high prisoner and personnel turnovers made quantitative analysis challenging, and conducting the study in male prisons only is a limitation.
- The number of participants interviewed and involved in focus group discussions provided a rich set of data to explore findings.

### KEYWORDS

Dementia, prisoner health, older prisoners, peer support, environment, awareness raising



## INTRODUCTION

1  
2  
3  
4 1  
5  
6 2 The number of prisoners over the age of 50<sup>1</sup> in England and Wales has tripled since 2002,  
7  
8 3 and now represents 16.3% of the overall prison population.[1] This is projected to rise  
9  
10 4 further in future.[2-3] Health problems and social care needs are reportedly extensive  
11  
12 5 among this group, estimated to affect over 85% of older prisoners, which has been  
13  
14 6 associated with an approximately three-fold increase in the financial costs of  
15  
16 7 accommodating them compared to the 'general' prisoner population.[4-8] The number of  
17  
18 8 prisoners diagnosed with dementia specifically is unknown, but is at least commensurate  
19  
20 9 with community levels, although likely to be much higher due to the poorer health and  
21  
22 10 lifestyles of prisoners, and the effects of a prison system built for younger, fitter  
23  
24 11 prisoners.[4-5, 9-12] Additionally, people living with dementia in prisons may have harsher  
25  
26 12 prison experiences than their more cognitively able counterparts, which can exacerbate  
27  
28 13 their symptoms, as they are more likely to be vulnerable to victimisation, isolation, and  
29  
30 14 punishment for failing to 'comply' with prison routines.[5, 10, 13-17] It is a matter of  
31  
32 15 national policy that prisons provide a standard of care equivalent to that in the  
33  
34 16 community,[18-19] but a recent parliamentary inquiry has stated that despite some areas of  
35  
36 17 good practice, the government is failing in its duty of care to prisoners in England and  
37  
38 18 Wales.[20]  
39  
40  
41  
42  
43  
44  
45  
46  
47  
48  
49

50 20 Dementia has become a health and social care policy priority in the UK, with the  
51  
52 21 Governments' dementia strategy promoting the establishment of Dementia Friendly  
53  
54 22 Communities [DFCs],[21-22] defined as places "where people with dementia are  
55  
56 23 understood, respected and supported".[23, p1] Key DFC principles include: the  
57  
58 24 empowerment and involvement of people with dementia in the formation and  
59  
60

1  
2  
3 1 development of communities, increased dementia awareness, challenging stigma, timely  
4  
5  
6 2 access to care, and supportive social and physical environments.[23] Evaluations of DFCs in  
7  
8 3 UK communities mostly reported increases in dementia awareness, but progress on social  
9  
10 4 and environmental change varied and the involvement of people living with dementia were  
11  
12  
13 5 limited in the short-term.[24-30] There have been no published evaluations that we have  
14  
15 6 found applying DFC principles in prisons in England and Wales, nor of any other intervention  
16  
17 7 targeted at people living with dementia in prisons internationally.[31,32] Given the human  
18  
19 8 rights and financial concerns surrounding the imprisonment of people with dementia,[12,  
20  
21 9 33-35] it seems imperative to explore, implement and evaluate programmes focused on  
22  
23 10 supporting this highly vulnerable population.  
24  
25  
26  
27  
28  
29

## 30 12 **RESEARCH AIMS**

31  
32 13 This study aimed to explore the application of the Alzheimer's Society Dementia Friendly  
33  
34 14 Community principles to two prisons. The research questions were:  
35  
36  
37  
38  
39

- 40 16 1) What progress was made towards applying DFC principles at each prison, following  
41  
42 17 an intervention comprised of information sessions and meetings with the  
43  
44 18 Alzheimer's Society?  
45  
46  
47 19 2) What was the impact of the intervention?  
48  
49  
50 20 3) What contextual factors affected implementation of the intervention and DFC  
51  
52 21 principles?  
53  
54  
55  
56  
57  
58  
59  
60

## METHOD

### STUDY DESIGN

The research was structured as a small-scale pilot study and process evaluation, employing a mixed methods design, with a one-year follow-up period. It was conducted in three stages:

- (i) PPI/E – established the need for dementia-related interventions at each prison, identified the people and site for the intervention, and assisted in modifying evaluation materials. Prisoners were not directly involved in recruiting or conducting the evaluation, but findings were fed-back to prisoners.
- (ii) Intervention – delivery of hour-long Dementia Friends Alzheimer’s Society [AS] information sessions (<https://www.dementiafriends.org.uk/WEBRequestInfoSession>), and meetings between prison staff and AS to plan and implement DFC-led alterations.
- (iii) Evaluation – of the information session, of progress towards implementing DFC principles, and of contextual factors affecting their application, using questionnaires pre- and post-information session and at follow-up, and individual interviews and focus groups at follow-up.

The sequencing of these three stages across the study are shown in Figure 1:

<Figure 1: Study steps>

### CONTEXT

This study was conducted in two prisons in the East of England. Prison A was a Category C sex offender prison with 34.2% of the population aged over 50,[36] and two opt-in 120 bed

1 wings for older prisoners (aged >60 years) which has had some adaptation (stair lifts, quiet  
2 room). There was also a prison-wide policy for older prisoners to be unlocked through the  
3 day. There were reportedly between zero and four prisoners diagnosed with dementia  
4 across the course of the study. Prison B was predominantly a local prison<sup>2</sup> with 16.1% of the  
5 population over 50,[37] and a 26-bed wing for older prisoners. In addition there was a 15-  
6 bed palliative and significant social care needs wing, with environmental adaptations  
7 (normalised dining area, hospital-type beds), which reportedly held five prisoners diagnosed  
8 with dementia at follow-up, and ran a cognitive stimulation group. This prison also had 24-  
9 hour healthcare staff and an inpatient wing. Both prisons had some prison-wide activities  
10 focused on older prisoners (such as dedicated gym/library sessions).

11

## 12 PARTICIPANTS

13 Forty-six prisoners were involved in the PPI/E phase of the study. A total of 68 individuals  
14 (50 prisoners and 18 staff) participated in the Intervention and Evaluation parts of the study,  
15 as shown in Figure 2:

16

### <Figure 2: Flow of participants>

17 Forty-five prisoners and staff attended information sessions, invited by the staff who were  
18 leading for the study within each prison, as selected by each prisons' No 1 Governor.  
19 Invitations were extended to those likely to be involved in supporting people with dementia  
20 at the prisons and included: older prisoners, prisoner peer supporters and staff working on  
21 specialist (older prisoner or health-oriented) wings. Information session attendees were also  
22 asked for their consent to be approached to participate in the follow-up evaluation, and

1  
2  
3 1 were invited to do so by researchers and prison staff leads – with 12 people from prison A  
4  
5 2 participating at 6-months, and a total of seven individuals from both prisons at 1-year  
6  
7  
8 3 follow-up. The remaining 23 follow-up evaluation participants were comprised of prison  
9  
10 4 staff who led on or participated in the intervention implementation at the prisons (who  
11  
12  
13 5 were invited by the research team for interview), and of additional prisoner peer supporters  
14  
15 6 and prison officers who were interested in dementia at the prisons (who were invited by the  
16  
17 7 prison staff leads). One person with dementia participated in PPI/E at Prison A, but none  
18  
19  
20 8 were involved in the evaluation, as far as we were aware. The reasons for this are somewhat  
21  
22  
23 9 unclear, as the research team was not directly involved in recruiting prisoners.  
24  
25  
26 10  
27  
28

29 11 Across the follow-up evaluation, 11 interviews were conducted with prison staff, and six  
30  
31 12 with prisoners. A further 24 prisoners participated in focus groups. In addition, AS  
32  
33 13 representatives (workers identified by AS to work with the prisons for this study) were  
34  
35  
36 14 interviewed, and were invited to do so by the researchers. Prisoners were selected for  
37  
38  
39 15 interview based on the type of peer supporter role they occupied, i.e. those providing direct  
40  
41 16 care assistance to people with dementia (for example, care support orderlies, wheelchair  
42  
43 17 pushers), those providing indirect assistance as a secondary part of their roles (such as  
44  
45  
46 18 library assistants), and prisoner representatives (who represent the views of prisoners at  
47  
48  
49 19 meetings with prison management). The remaining prisoners participated in focus groups.  
50  
51  
52 20  
53  
54  
55 21  
56  
57  
58 22  
59  
60

## 1 MATERIALS

2 Information sheets and consent forms were developed by the research team and modified  
3 according to National Offender Management Service [NOMS] specification. The rest of the  
4 materials used included:

- 5 (a) Alzheimer's Society Foundation Criteria for the Dementia-Friendly Communities  
6 Recognition Process.[38]
- 7 (b) Socio-demographic questionnaire (gender, age, education level, marital status, race,  
8 children, religion, politics).
- 9 (c) Study-specific Information Session Evaluation questionnaire developed by the  
10 research team, and modified following prisoner feedback. The questionnaire  
11 contained open and closed questions on knowledge, learning and confidence  
12 regarding dementia. (see Supplementary File 1)
- 13 (d) Study-specific Dementia Friendly Prisons Aims questionnaire, developed by the  
14 research team, based on the key DFC principles.[23] (see Supplementary File 2)
- 15 (e) The 'Dementia Friendly Physical Environments Checklist'.[39]
- 16 (f) Semi-structured interview schedules and focus group frameworks formulated by the  
17 research team, focused on the information session, support and barriers for people  
18 with dementia, and prison dementia friendliness.

## 20 PROCEDURES

21 As shown in Figure 1, both prisons facilitated PPI/E activities, and hosted dementia  
22 information sessions at which pre- and post-session evaluation questionnaires were

1  
2  
3 1 collected. Due to sessions over-running, there were difficulties collecting the socio-  
4  
5  
6 2 demographic questionnaire at Prison A. Both prisons' study leads met with AS  
7  
8 3 representatives, but only Prison A created and implemented DFC plans, at which a six-  
9  
10 4 month interim follow-up occurred due to rapidly falling numbers of information session  
11  
12 5 attendees. A full one-year follow-up was conducted at both prisons. At both follow-up  
13  
14 6 points, evaluation and dementia aims questionnaires were collected, and interviews and  
15  
16 7 focus groups conducted. Prisoner interviews were taped during legal visits, focus group  
17  
18 8 discussions within the prison were documented on flip chart paper as permission to tape  
19  
20 9 had not been sought in time, and staff interviews were taped at suitable locations within  
21  
22 10 and outside of the prison, one was scribed by a researcher. Informed consent was sought  
23  
24 11 from all participants prior to interviews or focus groups.  
25  
26  
27  
28  
29  
30  
31  
32  
33

## 34 13 **DATA ANALYSIS**

### 37 14 *Quantitative analysis*

38  
39  
40 15 The data were extracted from the questionnaires by a researcher (ST) who was not involved  
41  
42 16 in the intervention, and entered onto a dataset created using SPSS version 23.[40] One  
43  
44 17 researcher (NDW), who was not involved in either the intervention or data collection,  
45  
46 18 conducted an independent double-check to identify any incompatible entries. Both  
47  
48 19 researchers (NDW, ST) analysed the data using SPSS. Statistical analysis focused on pre- and  
49  
50 20 post-session and follow-up changes using Chi-squared, McNemar, or Wilcoxon signed-rank  
51  
52 21 tests ( $p < 0.05$ ).  
53  
54  
55  
56  
57  
58  
59  
60

## 1 *Qualitative analysis*

2  
3  
4  
5  
6 2 All taped interviews were transcribed verbatim which together with focus group flipcharts,  
7  
8  
9 3 were subject to a Framework Analysis.[41] This approach was selected as it could  
10  
11 4 accommodate differing data sources, and provided a clear and systematic structure for a  
12  
13  
14 5 team-based analysis. Using an inductive approach, all researchers: (i) read interviews and  
15  
16 6 noted initial themes; (ii) analysed five transcripts in-depth, noting further themes; (iii) based  
17  
18 7 on this created an analytical framework with main emergent themes; (iv) used this  
19  
20 8 framework to 'code' all material - two researchers independently categorised each  
21  
22 9 transcript using NVivo 11[42] or MS Word[43]; (v) analyses were combined and summarised  
23  
24 10 in an MS Excel[44] spreadsheet, with differences resolved within the team; and (vi) findings  
25  
26 11 were interpreted.  
27  
28  
29  
30  
31  
32  
33  
34

## 35 **RESULTS**

### 36 37 38 14 **SAMPLE CHARACTERISTICS**

39  
40  
41  
42 15 A total of 68 individuals (50 prisoners and 18 staff) participated at different stages of this  
43  
44 16 study. The majority of prisoners identified as male (n=49, 98%), and one prisoner identified  
45  
46 17 as transgender. Conversely, the staff sample was mostly composed of females (n=11, 79%,  
47  
48 18 missing =4). The mean age of the sample was 45.3 years, and ranged from 23-76 years  
49  
50 19 (missing=8). The mean age of the prisoner participants from Prison A (50.6 years) was  
51  
52 20 almost 10 years higher than the prisoner participants of Prison B (40.9 years). This  
53  
54 21 difference was statistically significant (t(44)=2.793, p=0.008). The overall mean age  
55  
56 22 differences between prisons and between prisoners and staff were not statistically  
57  
58  
59  
60



1  
2  
3 1 significant. With regards to the other socio-demographic variables, there were a large  
4  
5  
6 2 number of missing data making these difficult to interpret, however they have been  
7  
8 3 included as Supplementary File 3.  
9

## 10 11 4 12 13 14 15 5 **KEY FINDINGS**

16  
17  
18 6 This section will discuss the three research questions on progress, impact and context that  
19  
20 7 this study sought to answer, and present an analysis of each.  
21  
22

### 23 8 24 25 26 27 9 **RESEARCH QUESTION 1: PROGRESS**

28  
29  
30 10 Both prisons agreed to participate and engaged in the project and evaluation, but they  
31  
32 11 differed in the extent of their engagement. Progress was measured against Alzheimer's  
33  
34 12 Society criteria,[38] which is summarised in Table 1 for each prison.  
35  
36

37  
38 13 **<Table 1 here>**  
39

40  
41 14 Prison A met a number of the criteria which included joining a local Dementia Action  
42  
43 15 Alliance<sup>3</sup>, creating a DFC plan which was posted on the internet, running awareness raising  
44  
45 16 events, and making small environmental changes. Actions in these areas were reportedly  
46  
47 17 ongoing although slow, and mostly implemented within the older prisoner wings:  
48  
49  
50

51  
52 18  
53  
54  
55 19 *"I feel I've been so lucky to be involved in this project...it's one of the few places*  
56  
57 20 *that I've been where they've actually listened... and it's slow, but it's going to be*  
58  
59  
60

**Table 1: Progress as measured against Alzheimer's Society Foundation Criteria (2014)**

| CRITERIA                                                        | PRISON A                                                                                                                                                                                                                                                                                                                                                                                                                             | PRISON B                                                                                                                                                                                                                                            |
|-----------------------------------------------------------------|--------------------------------------------------------------------------------------------------------------------------------------------------------------------------------------------------------------------------------------------------------------------------------------------------------------------------------------------------------------------------------------------------------------------------------------|-----------------------------------------------------------------------------------------------------------------------------------------------------------------------------------------------------------------------------------------------------|
| 1. Create or join a Dementia Action Alliance (DAA)              | (i) Joined the local DAA, attended regularly by prison staff<br>(ii) Prison-only steering group not set up                                                                                                                                                                                                                                                                                                                           | The prison did not join nor create a DAA or similar                                                                                                                                                                                                 |
| 2. Identify a community leader                                  | There was a lead person liaising with the AS rep throughout. This changed several times across the study                                                                                                                                                                                                                                                                                                                             | The identified lead met with the AS rep once, but a dementia friendly community was not worked towards.                                                                                                                                             |
| 3. Have an awareness raising plan                               | (i) Information sessions delivered largely to prisoner peer supporters as part of this research; AS rep delivered further session at a prisoner conference<br>(ii) Two staff members trained as dementia champions enabling them to deliver awareness sessions<br>(iii) Information session placed on staff training rotation, delivered by a staff dementia champion<br>(iv) Awareness raising was a part of the prison action plan | (i) Information sessions delivered to prisoner peer supporters, and some healthcare and prison staff as part of the research<br>(ii) No known ongoing plan to raise dementia awareness at the prison, and no further information sessions delivered |
| 4. Involvement of people living with dementia, and their carers | (i) Prisoner peer supporters were asked for opinions, but project was staff led primarily<br>(ii) Little formal contact between AS rep and prisoners<br>(iii) No known involvement of family or friends of people with dementia                                                                                                                                                                                                      | Prison not working towards establishing a dementia friendly community within this project, so no prisoner nor family or friends involved.                                                                                                           |
| 5. Publicise the work of the community                          | (i) The dementia action plan was posted on the DAA website<br>(ii) The AS rep was a speaker at a prison-wide conference for prisoner peer supporters<br>(iii) Staff working outside of specialist wings appeared unaware of the project                                                                                                                                                                                              | (i) There was no dementia friendly community plan<br>(ii) A prisoner who attended the information session as part of this research, used the information to create an edition of the in-house prisoner magazine focused on dementia                 |
| 6. Focus the action plans on two or three key priorities        | A dementia action plan was created focused on: raising awareness; improving the physical environment; and working with partners inside and outside the prison                                                                                                                                                                                                                                                                        | No dementia action plan was created                                                                                                                                                                                                                 |
| 7. Have a 6-month and annual evaluation plan                    | (i) The prison participated in the research evaluation. The prison was continuing to work with AS and DAA, but unclear about ongoing plans to evaluate                                                                                                                                                                                                                                                                               | The prison participated in the research evaluation – no further evaluation plans                                                                                                                                                                    |

1  
2  
3 1 *slow, you just have to accept that. But, they do listen, and every time I go*  
4  
5  
6 2 *...something has happened in relation to what I've talked about previously. And*  
7  
8 3 *that is so unique" (Prison project worker).*  
9

10  
11 4  
12  
13  
14 5 Whilst Prison B engaged with the intervention initially (hosting information sessions and  
15  
16 6 meeting with an AS representative), there was little progress beyond this, with few AS  
17  
18 7 criteria met and no DFC plans created. The lack of continued engagement largely centred  
19  
20 8 around there being lower numbers of older prisoners at this prison, with other issues  
21  
22 9 prioritised as a result, and the belief that services for people with dementia at the prison  
23  
24 10 were good enough already. A prisoner at Prison B did use the information session materials  
25  
26 11 to produce an edition of the prison magazine focused on dementia, and the difficulty of  
27  
28 12 being in prison when family are experiencing dementia or supporting others with dementia.  
29  
30  
31  
32  
33  
34  
35  
36  
37

#### 38 14 **RESEARCH QUESTION 2: IMPACT**

39  
40  
41 15 Within this study, impact was assessed using study specific questionnaires evaluating (i) the  
42  
43 16 dementia information session, and (ii) whether DFC aims were met, and if changes were  
44  
45 17 made by the prison to support these. As no DFC plans were made or implemented at Prison  
46  
47 18 B, analysis of questionnaire (ii) will only be presented for Prison A. Quantitative results will  
48  
49 19 also be augmented by interview and focus group analyses.  
50  
51  
52  
53  
54  
55  
56  
57  
58  
59  
60

1  
2  
3 1 (a) *Information session evaluation*  
4

5  
6 2 Participants completed questionnaires evaluating the information session pre- (n=45) and  
7  
8 3 post-session (n=40), and at six-months (n=12) and one-year follow-up (n=7). This was also  
9  
10 4 explored further in interviews and focus groups. Table 2 shows data taken from the  
11  
12 5 questionnaires across the evaluation period:  
13  
14

15  
16 6 <Table 2 here>  
17

18  
19 7 All of the responses concerning perceived knowledge of dementia increased post-session,  
20  
21 8 reaching statistical significance for level of knowledge about dementia, its causes and  
22  
23 9 dementia friendly communities. Participants also reported feeling more confident talking to  
24  
25 10 people with dementia post-awareness session. At 6-months and one-year follow-up,  
26  
27 11 participants continued to report that they knew more about dementia than they had pre-  
28  
29 12 awareness session, differences which were statistically significant. Unsurprisingly, no results  
30  
31 13 were significant for the three participants sampled at both 6-months and 1-year follow-up.  
32  
33  
34  
35  
36  
37  
38  
39  
40

41 15 Some participants also reported that the session altered the way they supported people  
42  
43 16 living with dementia in the prison, with a positive knock-on effect on those relationships.  
44  
45 17 There were also reports of participants finding the information personally comforting and  
46  
47 18 useful in supporting colleagues, and also extending to their communities of friends and  
48  
49 19 family outside of prison:  
50  
51  
52  
53  
54  
55  
56

57 21 *“For me it helped me mostly because my grandad suffers with dementia... for me*  
58  
59 22 *[the information session] put my mind at ease a lot with that and helped me.*  
60

**Table 2: Descriptive statistics and comparative analyses of awareness session questionnaires**

|                                                                                                                 | PRE-COMPARISON ANALYSIS                    |                                           |                                            | POST-COMPARISON ANALYSIS                   |                                         | FOLLOW-UP ANALYSIS          |
|-----------------------------------------------------------------------------------------------------------------|--------------------------------------------|-------------------------------------------|--------------------------------------------|--------------------------------------------|-----------------------------------------|-----------------------------|
|                                                                                                                 | Pre-Post<br>(n=38)                         | Pre - 6-mth<br>(n=12)                     | Pre - 1-year<br>(n=7)                      | Post - 6 mth<br>(n=11)                     | Post - 1-year<br>(n=5)                  | 6-mth – 1 year<br>(n=3)     |
| <b>Do you know what dementia is?</b><br>(N° Yes, %; significance level)*                                        | 31(86.1)-36(100)<br>p=0.063<br>2 missing   | n/a                                       | n/a                                        | n/a                                        | n/a                                     | n/a                         |
| <b>How much do you know about dementia?</b><br>(median; significance/level)**                                   | 4 - 7<br>Z=-4.594,<br>p<0.001<br>1 missing | 5 - 6<br>Z=-2.831, p=<br>0.005            | 5 - 6<br>Z=-2.232, p=0.026                 | 7 - 6<br>Z=-1.311, p=0.190                 | 7 - 4<br>Z=0, p=1.000<br>1 missing      | 6 - 4<br>Z=-1.414, p=0.157  |
| <b>Do you know the causes of dementia?</b><br>(N° Yes, %; Significance level)*                                  | 7(25) – 24(85.7)<br>p<0.001<br>10 missing  | n/a                                       | n/a                                        | n/a                                        | n/a                                     | n/a                         |
| <b>Do you know what a dementia friendly community is?</b><br>(N° Yes, %; Significance level)*                   | 13(44.8)-26(89.7)<br>p<0.001<br>9 missing  | 7(70.0) - 9(90.0)<br>p=0.500<br>2 missing | 1(16.7) – 5 (83.3)<br>p=0.125<br>1 missing | 9(90.0) – 8(80.0)<br>p=1.000<br>1 missing  | 3(100) – 3(100)<br>p=1.000<br>2 missing | 3(100)– 3(100)<br>p=1.000   |
| <b>Did the awareness session increase your knowledge/did you learn?</b><br>(No, %; Significance level)*         | n/a                                        | n/a                                       | n/a                                        | 10 (100)– 9 (90.0)<br>p=1.000<br>1 missing | 4 – 4 (100)<br>p=1.000<br>1 missing     | 3(100) – 3 (100)<br>p=1.000 |
| <b>Confidence in talking about dementia to others?</b><br>(median; significance/level)**                        | 5 – 7<br>Z=-3.917,<br>p<0.001<br>8 missing | 5 - 7<br>Z=-0.854,<br>p=0.393             | 5 – 6<br>Z=-1.069, p=0.285<br>3 missing    | 7 - 7<br>Z=-1.897, p=0.058                 | 7 - 6<br>Z=0, p=1.000<br>1 missing      | 7 - 6<br>Z=0, p=1.000       |
| <b>Confidence in helping people living with dementia?</b><br>(median; significance/level)**                     | n/a                                        | n/a                                       | n/a                                        | n/a                                        | n/a                                     | 8 – 7<br>Z=0, p=1.000       |
| <b>Did the awareness session change your views on people with dementia?</b><br>(N° Yes, %; Significance level)* | n/a                                        | n/a                                       | n/a                                        | n/a                                        | n/a                                     | 3 – 3 (100)<br>p=1.000      |

\*Significance testing using exact McNemar's test

\*\*Significant testing using Wilcoxon signed-rank test

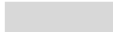 = statistically significant

1  
2  
3 1 *And I talked with my mum and my grandma about it a lot more because of that,*  
4  
5  
6 2 *because I felt a bit more confident having that knowledge” (Prisoner)*  
7  
8  
9 3

10  
11  
12 4 (b) *Dementia Friendly Prison Aims*  
13

14  
15 5 Table 3 shows study participants’ views on whether Prison A met DFC aims at 6 months  
16  
17 6 (n=15) and 1-year follow-up (n=12), using the DFC aims questionnaire. These were largely  
18  
19 7 independent samples, therefore a comparative analysis was not possible.  
20  
21  
22  
23 8

24  
25  
26 9 **<Table 3: Dementia Friendly Prison Aims questionnaire table>**  
27  
28  
29 10

30  
31  
32  
33 11 At both six-months and one-year follow-up, the majority of participants reported that  
34  
35 12 people with dementia in the prison did not face stigma and discrimination and were  
36  
37 13 supported to live independently at the prison. At 6-months, the latter was reported to have  
38  
39 14 improved – the only area in which participants reported positive change across the study. It  
40  
41 15 is possible that this reflects that prisons in general expect prisoners to function  
42  
43 16 independently within parameters, but in addition, Prison A had adopted a policy of  
44  
45 17 ‘enablement’, which appears to be compatible with this DFC aim:  
46  
47  
48  
49  
50  
51 18

52  
53  
54 19 *“I’m forever saying ‘enable’, enable as much as possible. Encourage them to*  
55  
56 20 *clean, encourage them to tidy their cell up... get them doing as much as possible.*  
57  
58 21 *[Person with dementia], for all the will in the world you couldn’t take work away*  
59  
60

**Table 3: Dementia Friendly Prison Aims and Changes made to Prison A**

| DEMENTIA FRIENDLY PRISON AIMS                                            | SIX-MONTH FOLLOW-UP<br>(n=15) |      |                           |      |           |      |           |      | ONE-YEAR FOLLOW-UP<br>(n=12) |      |                               |      |           |      |           |      |
|--------------------------------------------------------------------------|-------------------------------|------|---------------------------|------|-----------|------|-----------|------|------------------------------|------|-------------------------------|------|-----------|------|-----------|------|
|                                                                          | Aims met?                     |      | Change over last 6 months |      |           |      |           |      | Aims met?                    |      | Change over the last 6 months |      |           |      |           |      |
|                                                                          |                               |      | For better                |      | No change |      | For worse |      |                              |      | For better                    |      | No change |      | For worse |      |
|                                                                          | n                             | %    | N                         | %    | n         | %    | n         | %    | n                            | %    | n                             | %    | n         | %    | N         | %    |
| Views of people with dementia are listened to                            | 5                             | 33.3 | 4                         | 26.7 | 6         | 40   | 3         | 20   | 3                            | 25   | 3                             | 25   | 6         | 50   | 0         | 0    |
| Good understanding of dementia amongst prison staff                      | 2                             | 13.3 | 2                         | 13.3 | 10        | 66.7 | 2         | 13.3 | 2                            | 16.7 | 2                             | 16.7 | 4         | 33.3 | 2         | 16.7 |
| Good understanding of dementia amongst prisoners                         | 5                             | 33.3 | 5                         | 33.3 | 8         | 53.3 | 1         | 6.7  | 2                            | 16.7 | 3                             | 25   | 4         | 33.3 | 1         | 8.3  |
| Accessible and appropriate prison activities for people with dementia    | 4                             | 26.7 | 1                         | 6.7  | 11        | 73.3 | 2         | 13.3 | 3                            | 25   | 0                             | 0    | 7         | 58.3 | 1         | 8.3  |
| People with dementia are made to feel they can contribute to prison life | 4                             | 26.7 | 3                         | 20   | 8         | 53.3 | 3         | 20   | 3                            | 25   | 0                             | 0    | 7         | 58.3 | 1         | 8.3  |
| Staff pick up and act upon early signs of dementia                       | 2                             | 13.3 | 4                         | 26.7 | 8         | 53.3 | 1         | 6.7  | 2                            | 16.7 | 1                             | 8.3  | 6         | 50   | 1         | 8.3  |
| People with dementia can engage fully in prison life                     | 6                             | 40.0 | 4                         | 26.7 | 8         | 53.3 | 1         | 6.7  | 4                            | 33.3 | 1                             | 8.3  | 7         | 58.3 | 0         | 0    |
| People with dementia supported to live as independently as possible      | 10                            | 66.7 | 6                         | 40   | 4         | 26.7 | 3         | 20   | 10                           | 83.3 | 3                             | 25   | 6         | 50   | 0         | 0    |
| The prison is easy to get around for people with dementia                | 4                             | 26.7 | 1                         | 6.7  | 8         | 53.3 | 3         | 20.0 | 4                            | 33.3 | 0                             | 0    | 7         | 58.3 | 1         | 8.3  |
| People with dementia are respected                                       | 4                             | 26.7 | 1                         | 6.7  | 9         | 60   | 4         | 26.7 | 5                            | 41.7 | 1                             | 8.3  | 6         | 50   | 1         | 8.3  |
| People with dementia face stigma and discrimination here                 | 4                             | 26.7 | 3                         | 20.0 | 8         | 53.3 | 2         | 13.3 | 4                            | 33.3 | 1                             | 8.3  | 6         | 50   | 1         | 8.3  |

1  
2  
3 1 *from him, he just wants to do it himself...we're never going to take that off him"*

4  
5  
6 2 *(Prisoner)*

7  
8  
9 3  
10  
11  
12 4 Regarding the other DFC aims, only around a third or less of participants agreed that they  
13  
14 5 had been met. This included two foci of Prison A's DFC action plan: ease of navigation and  
15  
16 6 understanding and identifying symptoms of dementia, particularly amongst staff. Whilst on  
17  
18 7 the one hand this may represent a lack of observable progress in these areas, it may also  
19  
20 8 reflect that the dementia-focused work at Prison A was largely implemented across two  
21  
22 9 older prisoner wings rather than prison-wide. This was indicated by staff participants who  
23  
24 10 worked on mainstream wings reporting that they were unaware of the DFC project, and also  
25  
26 11 by prisoner observation:  
27  
28  
29  
30  
31  
32  
33  
34  
35

36 13 *"I think those that work specifically on [older prisoner wings], I think they're*  
37  
38 14 *becoming more aware. But as the others, they got a very mixed bag. A very*  
39  
40 15 *mixed bag" (Prisoner)*

### 41 42 43 44 16 45 46 17 **RESEARCH QUESTION 3: CONTEXTUAL FACTORS**

47  
48  
49 18 An analysis of staff and prisoner interviews and focus group discussion identified elements  
50  
51 19 of the prison context which could act as barriers or facilitators to the implementation of DFC  
52  
53 20 principles. These were related to: (i) institution and environment, (ii) staff, (iii) prisoners, (iv)  
54  
55 21 prison culture and (v) external factors. These are depicted in Figure 3 with apposite  
56  
57 22 quotations, and are discussed further below.  
58  
59  
60



1  
2  
3 1  
4  
5  
6 2 **<Figure 3: Barrier and Facilitators>**  
7  
8 3  
9  
10  
11 4 *(i) Institution and Environment*  
12  
13  
14  
15 5 Prison budget cuts and bureaucracy were reported to impact engagement with the  
16  
17 6 intervention, and implementation. Staff reported that the larger number of older prisoners  
18  
19 7 and relative stability of the prisoner population at prison A justified greater engagement  
20  
21 8 with the project (although this fluctuated according to numbers of prisoners with a  
22  
23 9 dementia diagnosis). At prison B, staff reported that the lower numbers of older prisoners  
24  
25 10 and the amount of prisoner turnover could not justify continued engagement – mental  
26  
27 11 health problems and substance misuse were clearer priorities. Staff leads at this prison also  
28  
29 12 reported that they felt their support of people with dementia was good enough already.  
30  
31  
32  
33  
34  
35 13  
36  
37  
38 14 Overall, staff and prisoner opinion of the dementia friendliness of both of the prisons was  
39  
40 15 mixed. Specialist wings were largely considered more suitable for people with dementia  
41  
42 16 than mainstream wings, as they were considered to be safer and less isolating, with more  
43  
44 17 relaxed regimes and activities. Opportunities to socialise outside of the specialist wings at  
45  
46 18 Prison A was considered positively, although some felt activities were too few at both  
47  
48 19 prisons. Environmentally, the specialist wings were reportedly easier to navigate and more  
49  
50 20 comfortable than mainstream wings. However, it was widely agreed that these fell short of  
51  
52 21 dementia friendliness (for example, cell doors not wide enough for wheelchairs at prison A,  
53  
54  
55  
56  
57  
58  
59  
60

1 and lack of stair lifts at prison B), as did the prisons overall, which were reportedly difficult  
2 to get around. Relaxed regimes, activities and adaptations were all affected by budget cuts.

3  
4  
5  
6  
7  
8  
9  
10  
11  
12 (ii) *Staff*

13  
14  
15 There were mixed reports from prisoners and staff on prison- and healthcare staff support  
16 for people with dementia in the prisons. Prison staff regularly working on specialist wings  
17 were described as more dementia aware and supportive of people with dementia, than staff  
18 working on mainstream wings. However, this more supportive practice seemed dependent  
19 on whether staff were able to choose this work. The introduction of social care at prison A  
20 and the presence of 24-hour healthcare staff at prison B were considered a potential benefit  
21 to people with dementia. There were mostly positive reports of most healthcare staff at  
22 both prisons, but there was some concern expressed about the more 'security' focused  
23 operation of the inpatient wing and staff at prison B. Some participants also suggested that  
24 healthcare staff seemed reluctant to make dementia diagnoses – with reports of prisoners  
25 with dementia symptoms outstripping numbers diagnosed, affecting treatment and also  
26 prison decisions to engage with dementia-related interventions.  
27  
28  
29  
30  
31  
32  
33  
34  
35  
36  
37  
38  
39  
40  
41  
42  
43  
44  
45  
46  
47  
48

49 (iii) *Prisoners*

50  
51  
52 Reports of the experiences of people with dementia at both prisons varied, but most  
53 participants suggested that it was likely to be confusing or frightening. Peer supporters  
54 providing direct care support for those with dementia were considered to provide vital  
55 support at Prison A – possibly as a result of less healthcare cover. The number of peer  
56  
57  
58  
59  
60

1 supporters at both prisons were seen as too few by most participants, with training, support  
2 and guidance around dementia mostly reported as inadequate, and a lack of formal  
3 contracts making roles unclear at prison A. It is of note that healthcare staff were reported  
4 to offer peer supporters good informal support on one of the specialist wings at prison B.

#### 6 (iv) Prison Culture

7 There were a number of aspects of prison policy, practice and culture which appeared to be  
8 compatible with DFC principles: *safety, security and decency* as guiding operating goals;  
9 *equality* in the application of rules; *equivalence* of care between prisons and the community;  
10 and at Prison A *enablement*. However, it seemed that some of these were applied patchily  
11 or too rigidly at times to be supportive, such as an expectation that all prisoners conform to  
12 rules *equally* irrespective of cognitive capacity, or a lack of *decency* in not offering through-  
13 the-night incontinence care.

15 Other aspects of prison culture were identified that could affect the support of people with  
16 dementia, as well as the likelihood of prisoners seeking help. These included: how the  
17 *punishment* of prison was perceived - prison as punishment or prison for punishment;  
18 perceptions of prisoners as potentially *malingering* or *manipulative*; a somewhat '*macho*'  
19 culture; *bullying and exploitation* (although only a couple of instances were reported); and  
20 *stigma* about age – which seemed to have some effect on prisoners' choice of  
21 accommodation and staff desire to work with this group. It is also of note that *power*  
22 relationships suffuse prison culture. Some manifestations of this reported were: fear of

1  
2  
3 1 censure resulting in the reluctance of some peer supporters to advocate for people with  
4  
5  
6 2 dementia in the prison, and for more junior prison staff to challenge practice.  
7

8  
9 3 *(v) External Factors – family/friends and central government*  
10

11  
12 4 There were a couple of examples of liaison between prison staff and family (mostly when  
13  
14 5 prisoners were dying or had died), family visits facilitated in quiet spaces, and the  
15  
16  
17 6 involvement of a charity that facilitated family connections at both prisons. However, there  
18  
19 7 appeared to be a lack of mechanisms/policy in place to maintain links between  
20  
21  
22 8 family/friends and people with dementia in both prisons, which included assistance with  
23  
24 9 telephone calls, and for family to report concerns or receive support, and some reports of  
25  
26  
27 10 other prisoners risking punishment to assist.  
28  
29

30  
31  
32  
33 12 Central governments' austerity-driven cuts were reported to impact the whole prison  
34  
35  
36 13 system in myriad ways. The lack of policy and strategy attention for people living with  
37  
38 14 dementia appeared to amplify the effect. Given both prisons reportedly struggled with  
39  
40  
41 15 implementing mandatory operations and training, attending to issues that are not  
42  
43 16 mandatory seemed to render the status of additional dementia input as a "luxury" (Staff).  
44  
45

46  
47  
48  
49  
50 18 **DISCUSSION**  
51

52  
53  
54 19 ***Summary of results***  
55

56  
57 20 Both of the participating prisons reported that DFC principles were applicable to them, but  
58  
59 21 differed in the extent to which they engaged with the intervention. Dementia information  
60

1  
2  
3 1 sessions were delivered at both, and reportedly increased participants' knowledge,  
4  
5  
6 2 confidence, and understanding of dementia, consistent with community DFC  
7  
8 3 evaluations.[24-30] Prison A created and implemented a DFC action plan, facilitated  
9  
10 4 additional awareness raising initiatives, small environmental changes, and reportedly helped  
11  
12  
13 5 people with dementia to live more independently – but, progress was considered slow and  
14  
15  
16 6 was mostly focused on older prisoner wings. Prison B did not create nor implement a DFC  
17  
18 7 action plan. Facilitators and barriers for the implementation of DFC principles largely flowed  
19  
20 8 from where individuals living with dementia chose to reside, with older prisoner-focused  
21  
22  
23 9 wings considered more dementia friendly, with more 'aware' staff and peer supporters.  
24  
25 10 Austerity-related cuts to prison budgets presented one of the biggest barriers to  
26  
27  
28 11 implementation and to decisions to engage in the intervention – which was also driven by  
29  
30 12 numbers of older prisoners and people with dementia diagnoses.  
31  
32  
33  
34  
35  
36  
37  
38  
39  
40  
41  
42  
43  
44  
45  
46  
47  
48  
49  
50  
51  
52  
53  
54  
55  
56  
57  
58  
59  
60

#### 14 ***Study strengths and limitations***

15 Study strengths and limitations divide into those related to the fidelity of the intervention at  
16 Prison A, and those related to the running of the evaluation at both prisons.  
17  
18  
19  
20  
21  
22

#### 18 ***Intervention***

19 Although most AS intervention criteria were met, one of the key DFC principles proved  
20 challenging: involving people with dementia (although this was also a difficulty for  
21 community interventions).[24-30] Within this study, this appeared to be partly due to  
22 fluctuating numbers of prisoners formally diagnosed with dementia, which also affected the

1  
2  
3 1 evaluation. Additionally, DFC plans were largely created by the prison lead alone, but a  
4  
5 2 steering group including people with dementia in the prison, family, peer supporters, and  
6  
7 3 staff from across the prison, could establish and maintain a prison DFC more consistent with  
8  
9 4 AS's central tenets. The AS did not 'train' prisoners as Dementia Champions as part of this  
10  
11 5 project. Overcoming bureaucratic obstacles to doing so would also be more compatible with  
12  
13 6 DFC principles.

### 17 18 19 7 *Evaluation*

20  
21  
22 8 This is the first published evaluation of the Government-endorsed DFC approach to prisons,  
23  
24 9 and – as a small-scale study – was essentially exploratory, taking place in only two prisons,  
25  
26 10 and with no control groups. The PPI/E phase of the study proved valuable in targeting the  
27  
28 11 work and ensuring materials were workable, although an expanded role for prisoner  
29  
30 12 involvement in design, recruitment and execution would have been desirable. The sample  
31  
32 13 size for the information session evaluation was relatively small, and significantly reduced  
33  
34 14 across the follow-up period affecting sub-group analyses, as did the lack of socio-  
35  
36 15 demographic data. A 'traditional' one-year follow-up study of a prison-based intervention  
37  
38 16 may be impossible on a small-scale due to high prisoner and staff turnover – larger sample  
39  
40 17 sizes, or briefer follow-up periods may be more feasible.

### 41 42 43 44 45 46 47 48 49 50 19 *Implications and recommendations*

51  
52  
53 20 The biggest challenge to the implementation of DFC principles in both prisons seemed to  
54  
55 21 come from the significantly reduced budgets allocated since 2010, resulting in a quarter of  
56  
57 22 the prison workforce being cut,[45-46] and contributing to record levels of prisoner violence  
58  
59  
60

1 and self-harm.[47-50] As older prisoners typically pose less problems and reoffend less than  
2 their younger counterparts,[51-54] their difficulties are in danger of going unrecognised,  
3 underscored by the Government's repeated refusal to create a strategy focused on  
4 them.[16, 55-60] Centralised resources and strategy are fundamental in the early release of  
5 people living with dementia in prison, which is currently rarely used, in guiding and funding  
6 better health and social care, and more appropriate social and physical environments.

7 However, there were a number of more locally-controlled practices that could facilitate DFC  
8 practice, some of which could be co-designed and delivered with external organisations:

- 9 • Partial segregation of older prisoners on wings that are 'opt-in' for both prisoners  
10 and staff, with trained and supported staff and peer supporters,[59] a  
11 comprehensive programme of activities, and opportunities for prisoners to leave  
12 the wing to access prison-wide activities and services if desired.[61-62]
- 13 • Dementia information sessions made available to the wider prison, to include a  
14 reflection of the impact of prison and its culture on people with dementia, and  
15 examples of good prison dementia practice from specialist wings or health/social  
16 care. Could be part of broader health promotion activities.
- 17 • Policies for older prisoners and those with dementia which allow them to be  
18 unlocked, to receive retirement pay commensurate with working peers' pay, and to  
19 access appropriate activities – potentially at an off-wing centre.
- 20 • Use of in-house expertise, labour, and adaption of simple DFC design to improve  
21 environments.[63-65]

- 1  
2  
3 1 • Access to specialist dementia training for healthcare staff where needed, and a clear  
4  
5  
6 2 referral pathway to specialist dementia services in the community. Dementia  
7  
8 3 awareness could be included as part of broader health promotion activities.  
9  
10 4 • Review and translate local policies, practices and procedures for older prisoners and  
11  
12  
13 5 people with dementia, including disciplinary and restraint procedures, and resultant  
14  
15 6 training can address more problematic aspects of prison culture, including stigma,  
16  
17 7 bullying, and malingering assumptions – linked as they are to prison suicide.[66]  
18  
19  
20 8 • To systematically support the links between people living with dementia in prison  
21  
22  
23 9 and their family to be more in line with NICE guidelines[67], for example, to assist  
24  
25 10 telephone calls, facilitate travel to visits in quiet spaces, increase liaison between  
26  
27 11 family/friends and the prison, and support family and friends in coping with the  
28  
29  
30 12 distress of having a loved one in prison with dementia.  
31  
32  
33  
34  
35

#### 36 ***Future research***

37  
38  
39 15 This was a pilot study that produced some promising findings warranting further  
40  
41  
42 16 investigation, such as a more robust evaluation with a larger sample size, across a variety of  
43  
44 17 prisons, for longer periods. Exploring the intersectionality of other protected characteristics  
45  
46 18 (for example gender and ethnicity) with age and dementia, will be particularly important to  
47  
48  
49 19 ensure the community is applicable to all.  
50  
51  
52  
53  
54

55 21 The role of prisoner peer supporters for people with dementia in prison appeared to be key  
56  
57  
58 22 in this study, and as to date there have been no published evaluations of their work,  
59  
60



1  
2  
3 1 additional study would be valuable.[68] There is a particular lack of research focused on  
4  
5  
6 2 people living with dementia in prisons and upon the challenges of resettlement[69], so  
7  
8 3 further research on their experiences and the most effective ways to support them, would  
9  
10 4 likely be useful to prison practitioners, researchers and policy makers.  
11  
12  
13  
14 5  
15  
16

## 17 6 **CONCLUSION**

18  
19  
20 7 In the two prisons involved in this pilot study and process evaluation, DFC principles were  
21  
22 8 considered applicable, and information sessions reportedly positive, but only one prison  
23  
24 9 continued to work with the Alzheimer's Society in creating and implementing DFC plans. A  
25  
26 10 number of contextual factors appeared to impact both engagement with the study and also  
27  
28 11 in dementia friendly practice in prisons in general. However, perhaps the most fundamental  
29  
30 12 was the balancing of resources - having to make difficult decisions about whether the  
31  
32 13 numbers of both older prisoners, and prisoners with dementia, were sufficiently high to  
33  
34 14 justify engagement with non-compulsory dementia-focused interventions in a context of  
35  
36 15 Government-sanctioned austerity and budget cuts. Without policy at Government-level to  
37  
38 16 focus attention on one of the most vulnerable groups living in prison, it may only be prisons  
39  
40 17 with very large numbers of older prisoners that can justify interventions targeting prisoners  
41  
42 18 with dementia, which raises moral, legal and ethical concerns for those who do not.  
43  
44  
45  
46  
47  
48  
49  
50  
51  
52  
53  
54  
55  
56  
57  
58  
59  
60

## 1 FOOTNOTES

2 <sup>1</sup> *The age cut-off for ‘older prisoner’ varies, but is typically thought to be 10 years younger*  
3 *than the general population, as prisoners have been reported to age more rapidly due to*  
4 *lifestyle, healthcare access, substance misuse, and the stress of imprisonment (see [70] for*  
5 *further discussion)*

6 <sup>2</sup> *Local prisons serve the courts local to the prison, holding prisoners on remand, those*  
7 *-serving shorter sentences and those serving longer sentences awaiting allocation to another*  
8 *prison.*

9 <sup>3</sup> *Organisations join local Dementia Action Alliances to “share best practice and take action*  
10 *on dementia” [71]*

11 <sup>4</sup>*anonymised to preserve confidentiality*

## 13 AUTHOR CONTRIBUTIONS

14 **Samantha Treacy** – design of study materials; facilitated focus groups and conducted  
15 interviews; led qualitative analysis, and conducted quantitative analyses; drafted the  
16 manuscript as lead author.

17 **Anna Haggith** – involvement with project conception and design; liaison with project  
18 partners; co-designed study materials; facilitated PPI/E, awareness sessions, interviews and  
19 focus groups; conducted qualitative analysis; contributed comments to manuscript drafts.

20 **Nuwan Darshana Wickramasinghe** – conducted quantitative analysis and qualitative  
21 analyses; edits to manuscript drafts.

1  
2  
3 1 **Tine Van Bortel** – Principle Investigator: conceived of and designed the study and grant  
4  
5 2 proposal; oversaw and advised on all aspects of the study; design of study materials; liaison  
6  
7 3 with project partners; contributed comments and edits to manuscript drafts.  
8  
9  
10  
11 4  
12  
13

## 14 5 **ACKNOWLEDGEMENTS**

16  
17  
18 6 We would like to thank the prisoners and staff of both prisons who participated in the study,  
19  
20 7 the prisoners who helped us with project design and materials, the Governors of both  
21  
22 8 prisons for their permission to conduct the study, and Her Majesty's Prison and Probation  
23  
24 9 Service, particularly Rupert Bailie, for permission and support. We would also like to thank  
25  
26 10 the Alzheimer's Society, particularly the representatives working with the prisons, and Laura  
27  
28 11 Meadowcraft, Caroline Lee and Natalie Mann for contributing towards the  
29  
30 12 conceptualisation of the initial proposal and its facilitation.  
31  
32  
33  
34  
35  
36 13  
37  
38

## 39 14 **FUNDING**

40  
41  
42 15 This work was funded by the Department of Health and Social Care's National Institute for  
43  
44 16 Health Research, Collaboration for Leadership for Applied Health Research and Care, East of  
45  
46 17 England.  
47  
48  
49

## 50 18 **DISCLAIMER**

51  
52  
53 19 The views expressed are those of the authors and not necessarily those of the NHS, the  
54  
55 20 NIHR or the Department of Health and Social Care, nor of Her Majesty's Prison and  
56  
57 21 Probation Service.  
58  
59  
60

1  
2  
3 1 **COMPETING INTERESTS**  
4

5  
6 2 None declared.  
7  
8  
9  
10 3

11  
12  
13 4 **PATIENT CONSENT**  
14

15  
16 5 Not required.  
17  
18  
19  
20 6

21  
22  
23 7 **ETHICS APPROVAL**  
24

25  
26 8 Advice was sought from the Anglia Ruskin University ethics committee, and full ethical  
27  
28 9 approval for the study was granted by the National Offender Management Service (NOMS) –  
29  
30 10 National Research Committee, with further permission obtained from the Governors of each  
31  
32 11 participating prison.  
33  
34  
35  
36  
37 12

38  
39  
40 13 **PROVENANCE AND PEER REVIEW**  
41

42  
43 14 Not commissioned, externally peer reviewed.  
44  
45  
46  
47 15

48  
49  
50 16 **DATA SHARING STATEMENT**  
51

52  
53 17 Deidentified participant data are available from Orcid ID 0000-0003-0467-6393 upon  
54  
55 18 request  
56  
57  
58  
59 19  
60

## REFERENCES

- 1  
2  
3  
4 1  
5  
6 2  
7  
8 3 1 Ministry of Justice. Prison population: 31 March 2018. London: Ministry of Justice, 2018.  
9  
10 4 [https://www.gov.uk/government/statistics/offender-management-statistics-quarterly-](https://www.gov.uk/government/statistics/offender-management-statistics-quarterly-october-to-december-2017)  
11  
12 5 [october-to-december-2017](https://www.gov.uk/government/statistics/offender-management-statistics-quarterly-october-to-december-2017) (accessed 06 December 2018).  
13  
14  
15 6  
16  
17 7 2 Allen G, Watson C. UK prison population statistics. House of Commons Library briefing  
18  
19 8 paper. London: House of Commons Library, 2017.  
20  
21  
22 9  
23  
24  
25  
26 10 3 Ministry of Justice. Prison population projections 2017 to 2022, England and Wales.  
27  
28 London: Ministry of Justice, 2017.  
29  
30 11  
31 12 [https://www.gov.uk/government/uploads/system/uploads/attachment\\_data/file/639801/p](https://www.gov.uk/government/uploads/system/uploads/attachment_data/file/639801/prison-population-projections-2017-2022.pdf)  
32  
33 13 [rison-population-projections-2017-2022.pdf](https://www.gov.uk/government/uploads/system/uploads/attachment_data/file/639801/prison-population-projections-2017-2022.pdf) (accessed 06 December 2018).  
34  
35  
36 14  
37  
38  
39 15 4 Di Lorito C, Völlm B, Dening T. Psychiatric disorders among older prisoners: a systematic  
40  
41 16 review and comparison study against older people in the community. *Aging Ment Health*  
42  
43 17 2018;22(1):1-10 doi:10.1080/13607863.2017.1286453 [published Online First 12 March  
44  
45 18 2017].  
46  
47  
48 19  
49  
50  
51 20 5 Moll A. Losing track of time: Dementia and the ageing prison population. London: Mental  
52  
53 21 Health Foundation, 2013. [https://www.mentalhealth.org.uk/sites/default/files/losing-track-](https://www.mentalhealth.org.uk/sites/default/files/losing-track-of-time-2013.pdf)  
54  
55 22 [of-time-2013.pdf](https://www.mentalhealth.org.uk/sites/default/files/losing-track-of-time-2013.pdf) (accessed 06 December 2018).  
56  
57  
58 23  
59  
60

- 1  
2  
3 1 6 Senior P, Forsyth K, Walsh E, et al. Health and social care services for older male adults in  
4  
5 2 prison: the identification of current service provision and piloting of an assessment and care  
6  
7 3 planning model. Health Services and Delivery Research. Southampton: National Institute for  
8  
9 4 Health Research, 2013.  
10  
11 5 [https://www.ncbi.nlm.nih.gov/books/NBK259270/pdf/Bookshelf\\_NBK259270.pdf](https://www.ncbi.nlm.nih.gov/books/NBK259270/pdf/Bookshelf_NBK259270.pdf) (accessed  
12  
13 6 06 December 2018).  
14  
15  
16  
17  
18 7  
19  
20 8 7 Hayes AJ, Burns A, Turnbull P, et al. Social and custodial needs of older adults in prisons.  
21  
22 9 *Age Ageing* 2013;42(5):589-93. doi:10.1093/ageing/aft066 [published Online First: 21 June  
23  
24 10 2013].  
25  
26  
27  
28 11  
29  
30 12 8 Hayes A, Burns A, Turnbull P, et al. The health and social needs of older male prisoners. *Int*  
31  
32 13 *J Geriatr Psychiatry* 2012;27(11):1155-62 doi:10.1002/gps.3761 [published Online First: 05  
33  
34 14 March 2012].  
35  
36  
37  
38 15  
39  
40 16 9 Combalbert N, Pennequin V, Ferrand C, et al. Cognitive impairment, self-perceived health  
41  
42 17 and quality of life of older prisoners. *Crim Behav Ment Health* 2018;28(1):36-49 doi:  
43  
44 18 10.1002/cbm.2023 [published Online First: 10 March 2017].  
45  
46  
47  
48 19  
49  
50 20 10 Cipriani G, Carlesi C, Danti S, et al. Old and dangerous: Prison and dementia. *J Forensic*  
51  
52 21 *Leg Med* 2017;51:40-44 doi: 10.1016/j.jflm.2017.07.004 [published Online First: 28 July  
53  
54 22 2017].  
55  
56  
57  
58 23  
59  
60

- 1  
2  
3 1 11 Lee C, Haggith A, Mann N, et al. Older prisoners and the Care Act 2014: An examination  
4  
5 of policy, practice and models of social care delivery. *Prison Serv J* 2016;224:35-41.  
6  
7  
8 3  
9  
10 4 12 Maschi T, Kwak J, Ko E, et al. Forget me not: dementia in prison. *Gerontologist*  
11  
12 2012;52(4):441-451 doi:10.1093/geront/gnr131 [published Online First: 11 January 2012].  
13  
14  
15 6  
16  
17 7 13 Gaston S. Vulnerable prisoners: Dementia and the impact on prisoners, staff and the  
18  
19 correctional setting. *Collegian* 2018;25:241-46 doi:10.1016/j.colegn.2017.05.004 [published  
20  
21 Online First: 02 June 2017].  
22  
23 9  
24  
25 10  
26  
27 11 14 du Toit, SHJ, McGrath M. Dementia in prisons – enabling better care practices for those  
28  
29 ageing in correctional facilities. *Br J Occup Ther* Published Online First: 19 December 2017.  
30  
31 doi: 10.1177/0308022617744509  
32  
33  
34  
35 14  
36  
37 15 15 Feczko A. Dementia in the incarcerated elderly adult: innovative solutions to promote  
38  
39 quality care. *J Am Assoc Nurse Pract* 2014;26(12):640-8 doi: 10.1002/2327-6924.12189  
40  
41 [published Online First: 12 November 2018].  
42  
43  
44  
45 18  
46  
47 19 16 Justice Committee. Older prisoners: Fifth report of session 2013-14. London: House of  
48  
49 Commons, 2013. <https://www.parliament.uk/documents/commons->  
50  
51 [committees/justice/older-prisoners.pdf](https://www.parliament.uk/documents/commons-committees/justice/older-prisoners.pdf) (accessed 06 December 2018).  
52  
53  
54 22  
55  
56 23 17 Christodoulou M. Locked up and at risk of dementia. *Lancet Neurol* 2012;11(9):750-1 doi:  
57  
58 10.1016/S1474-4422(12)70195-3 [published Online First: 18 August 2012].  
59  
60

- 1  
2  
3 1  
4  
5  
6 2 18 Department of Health. The future organisation of prison health care. London:  
7  
8 3 Department of Health, 1999.  
9  
10 4 13 5 15 onsum\_dh/groups/dh\_digitalassets/@dh/@en/documents/digitalasset/dh\_4106031.pdf  
16 6 (accessed 06 December 2018).  
17  
18 7  
19  
20 8 19 Care Act. UK: The Stationary Office, 2014.  
21  
22 9 <http://www.legislation.gov.uk/ukpga/2014/23/contents/enacted> (accessed 06 December  
23 10 2018).  
24  
25  
26  
27 11  
28  
29  
30 12 20 Health and Social Care Committee. Prison health. London: House of Commons, 2018.  
31  
32 13 <https://publications.parliament.uk/pa/cm201719/cmselect/cmhealth/963/963.pdf>  
33 14 (accessed on 06 December 2018).  
34  
35  
36  
37 15  
38  
39  
40 16 21 Department of Health. Prime Minister's challenge on dementia 2020. London:  
41  
42 17 Department of Health, 2015.  
43  
44 18 46 [m-dementia2020.pdf](https://www.gov.uk/government/uploads/system/uploads/attachment_data/file/414344/p<br/>47 m-dementia2020.pdf) (accessed 06 December 2018).  
48  
49  
50 20  
51  
52 21 22 Department of Health. Prime Minister's challenge on dementia: Delivering major  
53  
54 22 improvements in dementia care and research by 2015. London: Department of Health,  
55  
56  
57 23 2012.  
58  
59  
60



- 1  
2  
3 1 [https://www.gov.uk/government/uploads/system/uploads/attachment\\_data/file/215101/d](https://www.gov.uk/government/uploads/system/uploads/attachment_data/file/215101/d)  
4  
5  
6 2 [h\\_133176.pdf](https://www.gov.uk/government/uploads/system/uploads/attachment_data/file/215101/d_h_133176.pdf) (accessed 06 December 2018).  
7  
8 3  
9  
10 4 23 Alzheimer's Society. Guidance for communities registering for the recognition process for  
11 dementia friendly communities. London: Alzheimer's Society, 2013.  
12  
13 5  
14  
15 6 [https://www.alzheimers.org.uk/sites/default/files/2018-](https://www.alzheimers.org.uk/sites/default/files/2018-06/DFC%20Recognition%20process%20-%20Guidance%20for%20communities_FS%20albert_4.pdf)  
16  
17  
18 7 [06/DFC%20Recognition%20process%20-](https://www.alzheimers.org.uk/sites/default/files/2018-06/DFC%20Recognition%20process%20-%20Guidance%20for%20communities_FS%20albert_4.pdf)  
19  
20 8 [%20Guidance%20for%20communities\\_FS%20albert\\_4.pdf](https://www.alzheimers.org.uk/sites/default/files/2018-06/DFC%20Recognition%20process%20-%20Guidance%20for%20communities_FS%20albert_4.pdf) (accessed 06 December 2018).  
21  
22  
23 9  
24  
25 10 24 Dean J, Silverside K, Crampton J, et al. Evaluation of the Bradford Dementia Friendly  
26 Communities Programme. York: Joseph Rowntree Foundation, 2015.  
27  
28 11  
29  
30 12 [https://www.jrf.org.uk/report/evaluation-bradford-dementia-friendly-communities-](https://www.jrf.org.uk/report/evaluation-bradford-dementia-friendly-communities-programme)  
31  
32 13 [programme](https://www.jrf.org.uk/report/evaluation-bradford-dementia-friendly-communities-programme) (accessed 06 December 2018).  
33  
34  
35 14  
36  
37 15 25 Dean J, Silverside K, Crampton J, et al. Evaluation of the York Dementia Friendly  
38 Communities Programme. York: Joseph Rowntree Foundation, 2015.  
39  
40 16  
41  
42 17 <https://www.jrf.org.uk/report/evaluation-york-dementia-friendly-communities-programme>  
43  
44 18 (accessed 06 December 2018).  
45  
46  
47 19  
48  
49 20 26 Henderson J. Dementia friendly communities: Edinburgh City initiatives 2014-2015.  
50 Edinburgh: Faith in Older People, 2015.  
51  
52 21  
53  
54 22 [http://evaluationsupportscotland.org.uk/media/uploads/resources/dementia\\_friendly\\_edin](http://evaluationsupportscotland.org.uk/media/uploads/resources/dementia_friendly_edinburgh_final.pdf)  
55  
56 23 [burgh\\_final.pdf](http://evaluationsupportscotland.org.uk/media/uploads/resources/dementia_friendly_edinburgh_final.pdf) (accessed 06 December 2018).  
57  
58  
59 24  
60

- 1  
2  
3 1 27 Seydak E, Holmes M, Lynch S, et al. Building a Dementia Friendly Community in Northern  
4  
5  
6 2 Ireland: Learning from the DEED Project in Derry. York: Joseph Rowntree Foundation, 2015.  
7  
8 3 [https://www.jrf.org.uk/report/building-dementia-friendly-community-northern-ireland-](https://www.jrf.org.uk/report/building-dementia-friendly-community-northern-ireland-learning-deed-project-derry)  
9  
10 4 [learning-deed-project-derry](https://www.jrf.org.uk/report/building-dementia-friendly-community-northern-ireland-learning-deed-project-derry) (accessed 06 December 2018).  
11  
12  
13 5  
14  
15 6 28 Oxford Brookes University. Evaluation of Hampshire Dementia Friendly Communities:  
16  
17 7 Final Report. Oxford: Oxford Brookes University, 2015.  
18  
19 8 [https://ipc.brookes.ac.uk/publications/publication\\_814.html](https://ipc.brookes.ac.uk/publications/publication_814.html) (accessed 06 December 2018).  
20  
21  
22 9  
23  
24  
25 10 29 Oxford Brookes University. Oxford Dementia Challenge Group: Evaluation of Dementia  
26  
27 11 Friendly Communities Project. Oxford: Oxford Brookes University, 2014.  
28  
29 12 [https://ipc.brookes.ac.uk/publications/Oxfordshire\\_Dementia\\_Friendly\\_Communities\\_evalu](https://ipc.brookes.ac.uk/publications/Oxfordshire_Dementia_Friendly_Communities_evaluation_-_August_2014.pdf)  
30  
31  
32 13 [ation - August 2014.pdf](https://ipc.brookes.ac.uk/publications/Oxfordshire_Dementia_Friendly_Communities_evaluation_-_August_2014.pdf) (accessed 06 December 2018).  
33  
34  
35 14  
36  
37 15 30 Innes A, Cutler C, Heward M, et al. Dorset Dementia Friendly Communities Project: Final  
38  
39 16 Evaluation Report (June 2014). Bournemouth: Bournemouth University, 2014.  
40  
41  
42 17  
43  
44  
45 18 31 Stevens B, Shaw R, Bewert P, Salt M, Alexander R, Gee BL. Systematic review of aged care  
46  
47 19 interventions for older prisoners. *Australas J Ageing* 2017;37(1):34-42  
48  
49 20 doi:10.1111/ajag.12484 [published Online First 06 December 2017].  
50  
51  
52 21  
53  
54 22 32 Lee C, Treacy S, Haggith A, Wickramasinghe ND, Cater F, Kuhn I, Van Bortel T. A  
55  
56 23 systematic integrative review of programmes addressing the social care needs of older  
57  
58 24 prisoners. *Health & Justice*. In press.  
59  
60

- 1  
2  
3 1  
4  
5  
6 2 33 Baldwin J, Leete J. Behind bars: the challenge of an ageing prison population. *Australian*  
7  
8 3 *Journal of Dementia Care* 2012;1(2):16-19.  
9  
10 4  
11  
12  
13 5 34 Human Rights Watch. Old behind bars: The aging prison population in the United States.  
14  
15 6 New York: Human Rights Watch, 2012. [https://www.hrw.org/report/2012/01/27/old-](https://www.hrw.org/report/2012/01/27/old-behind-bars/aging-prison-population-united-states)  
16  
17 [behind-bars/aging-prison-population-united-states](https://www.hrw.org/report/2012/01/27/old-behind-bars/aging-prison-population-united-states) (accessed 06 December 2018).  
18 7  
19  
20 8  
21  
22  
23 9 35 Fazel S, McMillan J, O'Donnell I. Dementia in prison: ethical and legal implications. *J Med*  
24  
25 10 *Ethics* 2002;28(3):156-159 doi:10.1136/jme.28.3.156  
26  
27  
28 11  
29  
30 12 36 Her Majesty's Inspectorate of Prisons. HMP [Prison A<sup>4</sup>]. London: Her Majesty's  
31  
32 13 Inspectorate of Prisons.  
33  
34  
35 14  
36  
37 15 37 Her Majesty's Inspectorate of Prisons. HMP [Prison B<sup>4</sup>]. London: Her Majesty's  
38  
39 16 Inspectorate of Prisons.  
40  
41  
42 17  
43  
44  
45 18 38 Alzheimer's Society. Foundation criteria for the dementia-friendly communities  
46  
47 19 recognition process. London: Alzheimer's Society, 2014.  
48  
49 20 [https://www.alzheimers.org.uk/sites/default/files/2018-](https://www.alzheimers.org.uk/sites/default/files/2018-06/DFC%20Foundation%20criteria_Fs%20Albert_4.pdf)  
50  
51 [06/DFC%20Foundation%20criteria\\_Fs%20Albert\\_4.pdf](https://www.alzheimers.org.uk/sites/default/files/2018-06/DFC%20Foundation%20criteria_Fs%20Albert_4.pdf) (accessed 06 December 2018).  
52 21  
53  
54 22  
55  
56  
57 23 39 University of Salford. Dementia Friendly Physical Environments Checklist. Salford,  
58  
59 24 University of Salford. 2013.  
60

- 1  
2  
3 1 [http://www.dementiaaction.org.uk/assets/0000/4336/dementia\\_friendly\\_environments\\_ch](http://www.dementiaaction.org.uk/assets/0000/4336/dementia_friendly_environments_checklist.pdf)  
4  
5 2 [ecklist.pdf](#) (accessed 06 December 2018).  
6  
7 3  
8  
9  
10 4 40 IBM Corp. IBM SPSS Statistics for Windows. Version 23.0, 2015. Armonk, NY: IBM Corp.  
11  
12 5  
13  
14  
15 6 41 Gale NK, Heath G, Cameron E, et al. Using the framework method for the analysis of  
16  
17 qualitative data in multi-disciplinary health research. *BMC Med Res Methodol*  
18 7  
19 2013;13(1):117 doi:10.1186/1471-2288-13-117  
20 8  
21  
22 9  
23  
24  
25 10 42 QSR International Pty Ltd. NVivo qualitative data analysis software. Version 11, 2011.  
26  
27 Melbourne: QSR International Pty Ltd.  
28 11  
29  
30 12  
31  
32 13 43 Microsoft Corporation. Microsoft Word. Version 16.0.4390.1000, 2016. Washington:  
33  
34 Microsoft Corporation.  
35 14  
36  
37 15  
38  
39 16 44 Microsoft Corporation. Microsoft Excel. Version 16.0.4390.1000, 2016. Washington:  
40  
41 Microsoft Corporation.  
42 17  
43  
44 18  
45  
46 19 45 Ministry of Justice. Her Majesty's Prison and Probation Service (HMPPS) workforce  
47  
48 quarterly: June 2017. London: Ministry of Justice, 2017.  
49 20  
50  
51 21 [https://www.gov.uk/government/statistics/her-majestys-prison-and-probation-service-](https://www.gov.uk/government/statistics/her-majestys-prison-and-probation-service-workforce-quarterly-june-2017)  
52  
53 [workforce-quarterly-june-2017](#) (accessed 06 December 2018).  
54 22  
55  
56 23  
57  
58  
59  
60

- 1  
2  
3 1 46 Prison Reform Trust. Prison: the facts. Bromley briefings, Summer 2018. London: Prison  
4  
5  
6 2 Reform Trust, 2018.  
7  
8 3 <http://www.prisonreformtrust.org.uk/Portals/0/Documents/Bromley%20Briefings/Summer>  
9  
10 4 [%202018%20factfile.pdf](http://www.prisonreformtrust.org.uk/Portals/0/Documents/Bromley%20Briefings/Summer%202018%20factfile.pdf) (accessed 06 December 2018).  
11  
12  
13 5  
14  
15 6 47 Ministry of Justice. Safety in custody quarterly bulletin: December 2017. London:  
16  
17 Ministry of Justice, 2018. [https://www.gov.uk/government/statistics/safety-in-custody-](https://www.gov.uk/government/statistics/safety-in-custody-quarterly-update-to-december-2017)  
18 7 [quarterly-update-to-december-2017](https://www.gov.uk/government/statistics/safety-in-custody-quarterly-update-to-december-2017) (accessed 06 December 2018).  
19  
20 8  
21  
22  
23 9  
24  
25 10 48 Ministry of Justice. Prison Safety and Reform. London: Ministry of Justice, 2016.  
26  
27 [https://www.gov.uk/government/uploads/system/uploads/attachment\\_data/file/565014/c](https://www.gov.uk/government/uploads/system/uploads/attachment_data/file/565014/cm-9350-prison-safety-and-reform-web.pdf)  
28 11 [m-9350-prison-safety-and-reform- web .pdf](https://www.gov.uk/government/uploads/system/uploads/attachment_data/file/565014/cm-9350-prison-safety-and-reform-web.pdf) (accessed 06 December 2018).  
29  
30 12  
31  
32  
33 13  
34  
35 14 49 Beard J, Allen G. Prison safety in England and Wales. House of Commons Library briefing  
36  
37 paper. London: House of Commons Library, 2017.  
38 15  
39 <https://researchbriefings.parliament.uk/ResearchBriefing/Summary/CBP-7467> (accessed 06  
40 16  
41  
42 17 December 2018).  
43  
44  
45 18  
46  
47 19 50 Her Majesty's Inspectorate of Prisons. Annual report 2016-17. London: Her Majesty's  
48  
49 Inspectorate of Prisons, 2017. [http://www.justiceinspectors.gov.uk/hmiprison/wp-](http://www.justiceinspectors.gov.uk/hmiprison/wp-content/uploads/sites/4/2017/07/HMIP-AR_2016-17_CONTENT_11-07-17-WEB.pdf)  
50 20 [content/uploads/sites/4/2017/07/HMIP-AR\\_2016-17\\_CONTENT\\_11-07-17-WEB.pdf](http://www.justiceinspectors.gov.uk/hmiprison/wp-content/uploads/sites/4/2017/07/HMIP-AR_2016-17_CONTENT_11-07-17-WEB.pdf)  
51  
52 21  
53  
54 22 (accessed 06 December 2018).  
55  
56  
57 23  
58  
59  
60

- 1  
2  
3 1 51 Her Majesty's Inspectorate of Prisons. 'No problems – old and quiet': Older prisoners in  
4  
5  
6 2 England and Wales. London: Her Majesty's Inspectorate of Prisons, 2004.  
7  
8 3 [https://www.justiceinspectrates.gov.uk/hmiprisons/wp-](https://www.justiceinspectrates.gov.uk/hmiprisons/wp-content/uploads/sites/4/2014/08/OlderPrisoners-2004.pdf)  
9  
10 4 [content/uploads/sites/4/2014/08/OlderPrisoners-2004.pdf](https://www.justiceinspectrates.gov.uk/hmiprisons/wp-content/uploads/sites/4/2014/08/OlderPrisoners-2004.pdf) (accessed 06 December 2018).  
11  
12  
13 5  
14  
15 6 52 Brunton-Smith I, Hopkins K. The factors associated with proven re-offending following  
16  
17 7 release from prison: findings from waves 1 to 3 of SPCR – Results from the Surveying  
18  
19 8 Prisoner Crime Reduction (SPCR) longitudinal cohort study of prisoners. Ministry of Justice  
20  
21 9 Analytical Series. London: Ministry of Justice, 2013.  
22  
23 10 [https://www.gov.uk/government/uploads/system/uploads/attachment\\_data/file/491119/r](https://www.gov.uk/government/uploads/system/uploads/attachment_data/file/491119/re-offending-release-waves-1-3-spcr-findings.pdf)  
24  
25 11 [e-offending-release-waves-1-3-spcr-findings.pdf](https://www.gov.uk/government/uploads/system/uploads/attachment_data/file/491119/re-offending-release-waves-1-3-spcr-findings.pdf) (accessed 06 December 2018).  
26  
27  
28 12  
29  
30 13 53 Omolade S. The needs and characteristics of older prisoners: Results from the Surveying  
31  
32 14 Prisoner Crime Reduction (SPCR) survey. Ministry of Justice analytical summary. London:  
33  
34 15 Ministry of Justice, 2014.  
35  
36 16 [https://www.gov.uk/government/uploads/system/uploads/attachment\\_data/file/368177/n](https://www.gov.uk/government/uploads/system/uploads/attachment_data/file/368177/needs-older-prisoners-spcr-survey.pdf)  
37  
38 17 [eeds-older-prisoners-spcr-survey.pdf](https://www.gov.uk/government/uploads/system/uploads/attachment_data/file/368177/needs-older-prisoners-spcr-survey.pdf) (accessed 06 December 2018).  
39  
40  
41  
42  
43  
44  
45  
46  
47 19 54 Ministry of Justice. Proven reoffending tables (3 monthly), April 2016 to June 2016.  
48  
49 20 London: Ministry of Justice, 2018. [https://www.gov.uk/government/statistics/proven-](https://www.gov.uk/government/statistics/proven-reoffending-statistics-april-2016-to-june-2016)  
50  
51 21 [reoffending-statistics-april-2016-to-june-2016](https://www.gov.uk/government/statistics/proven-reoffending-statistics-april-2016-to-june-2016) (accessed 06 December 2018).  
52  
53  
54  
55  
56  
57 23 55 House of Commons Committee of Public Accounts. Mental health in prisons: Eighth  
58  
59 24 report of session 2017-19. London: House of Commons, 2017.  
60

- 1  
2  
3 1 <https://publications.parliament.uk/pa/cm201719/cmselect/cmpubacc/400/400.pdf>  
4  
5  
6 2 (accessed 06 December 2018).  
7  
8 3  
9  
10 4 56 Her Majesty's Inspectorate of Prisons. Annual report 2015-16. London: Her Majesty's  
11  
12  
13 5 Inspectorate of Prisons, 2016. [https://www.justiceinspectores.gov.uk/hmiprison/wp-](https://www.justiceinspectores.gov.uk/hmiprison/wp-content/uploads/sites/4/2016/07/HMIP-AR_2015-16_web.pdf)  
14  
15 6 [content/uploads/sites/4/2016/07/HMIP-AR\\_2015-16\\_web.pdf](https://www.justiceinspectores.gov.uk/hmiprison/wp-content/uploads/sites/4/2016/07/HMIP-AR_2015-16_web.pdf) (accessed 06 December  
16  
17 7 2018).  
18  
19  
20 8  
21  
22 9 57 Prisons & Probation Ombudsman. Learning lessons bulletin: Dementia. London: Prisons &  
23  
24  
25 10 Probation Ombudsman, 2016. [http://www.ppo.gov.uk/app/uploads/2016/07/PPO-](http://www.ppo.gov.uk/app/uploads/2016/07/PPO-Learning-Lessons-Bulletins_fatal-incident-investigations_issue-11_Dementia_WEB_Final.pdf)  
26  
27 11 [Learning-Lessons-Bulletins\\_fatal-incident-investigations\\_issue-11\\_Dementia\\_WEB\\_Final.pdf](http://www.ppo.gov.uk/app/uploads/2016/07/PPO-Learning-Lessons-Bulletins_fatal-incident-investigations_issue-11_Dementia_WEB_Final.pdf)  
28  
29 12 (accessed 06 December 2018).  
30  
31  
32 13  
33  
34 14 58 Prisons & Probation Ombudsman. Learning from PPO investigations: Older prisoners.  
35  
36  
37 15 London: Prisons & Probation Ombudsman, 2017. [http://www.ppo.gov.uk/wp-](http://www.ppo.gov.uk/wp-content/uploads/2017/06/6-3460_PPO_Older-Prisoners_WEB.pdf)  
38  
39 16 [content/uploads/2017/06/6-3460\\_PPO\\_Older-Prisoners\\_WEB.pdf](http://www.ppo.gov.uk/wp-content/uploads/2017/06/6-3460_PPO_Older-Prisoners_WEB.pdf) (accessed 06 December  
40  
41 17 2018).  
42  
43  
44 18  
45  
46 19 59 Cornish N, Edgar K, Hewson A, et al. Social care or systemic neglect? Older people on  
47  
48  
49 20 release from prison. London: Prison Reform Trust, 2016.  
50  
51  
52 21 [http://www.prisonreformtrust.org.uk/Portals/0/Documents/Older-prisoner-](http://www.prisonreformtrust.org.uk/Portals/0/Documents/Older-prisoner-resettlement.pdf)  
53  
54 22 [resettlement.pdf](http://www.prisonreformtrust.org.uk/Portals/0/Documents/Older-prisoner-resettlement.pdf) (accessed 06 December 2018).  
55  
56  
57 23  
58  
59  
60

- 1  
2  
3 1 60 Ministry of Justice. Government response to the Justice Committee's fifth report of  
4  
5  
6 2 session 2013-14: 'Older Prisoners'. London: Ministry of Justice, 2014.  
7  
8 3 [https://www.gov.uk/government/uploads/system/uploads/attachment\\_data/file/256609/r](https://www.gov.uk/government/uploads/system/uploads/attachment_data/file/256609/response-older-prisoners.pdf)  
9  
10 4 [esponse-older-prisoners.pdf](https://www.gov.uk/government/uploads/system/uploads/attachment_data/file/256609/response-older-prisoners.pdf) (accessed 06 December 2018).  
11  
12  
13 5  
14  
15 6 61 Wangmo T, Handtke V, Bretschneider W, et al. Prisons should mirror society: the debate  
16  
17  
18 7 on age-segregated housing for older prisoners. *Ageing & Society* 2017;37(4):675-694 doi:  
19  
20 8 10.1017/S 0144686X15001373 [published Online First: 09 December 2015].  
21  
22  
23 9  
24  
25 10 62 Kerbs JJ, Jolley JM, Kanaboshi N. The interplay between law and social science in the age  
26  
27  
28 11 segregation debate. *J Crime Justice* 2015;38(1):77-95 doi: 10.1080/0735648X.2014.894856  
29  
30 12 [published Online First: 26 Mar 2014].  
31  
32  
33 13  
34  
35 14 63 Alzheimer's Society. Making Your Home Dementia Friendly. London: Alzheimer's Society,  
36  
37 15 2015. <https://www.alzheimers.org.uk/get-support/making-your-home-dementia-friendly>  
38  
39 16 (accessed 06 December 2018).  
40  
41  
42 17  
43  
44  
45 18 64 The King's Fund. Developing supportive design for people with dementia: The King's Fund  
46  
47 19 Enhancing the Healing Environment Programme 2009-2012. London: The King's Fund, 2013.  
48  
49 20 <https://www.kingsfund.org.uk/publications/developing-supportive-design-people-dementia>  
50  
51 21 (accessed 06 December 2018).  
52  
53  
54 22  
55  
56  
57 23 65 The King's Fund. Environments for care at end of life: The King's Fund Enhancing the  
58  
59 24 Healing Environment Programme 2008-2010. London: The King's Fund, 2011.



- 1  
2  
3 1 <https://www.kingsfund.org.uk/publications/environments-care-end-life> (accessed 06  
4  
5  
6 2 December 2018).  
7  
8 3  
9  
10 4 66 The Howard League for Penal Reform. Preventing prison suicides: Perspectives from the  
11  
12 inside. London: The Howard League for Penal Reform, 2016. [https://howardleague.org/wp-](https://howardleague.org/wp-content/uploads/2016/05/Preventing-prison-suicide.pdf)  
13 5  
14 [content/uploads/2016/05/Preventing-prison-suicide.pdf](https://howardleague.org/wp-content/uploads/2016/05/Preventing-prison-suicide.pdf) (accessed 06 December 2018).  
15 6  
16  
17  
18 7  
19  
20 8 67 National Institute for Health and Care Excellence. Dementia: assessment, management  
21  
22 and support for people living with dementia and their carers. London: National Institute for  
23 9  
24 Health and Care Excellence, 2018.  
25 10  
26  
27 11 <https://www.nice.org.uk/guidance/ng97/chapter/Recommendations#supporting-carers>  
28  
29 (accessed 06 December 2018).  
30 12  
31  
32 13  
33  
34  
35 14 68 Stewart W, Edmond SW. Prisoner peer caregiving: a literature review. *Nursing Standard*  
36  
37 2017;31(32):44-51 doi: 10.7748/ns.2017.e10468 [published Online First 06 April 2017].  
38 15  
39  
40 16  
41  
42 17 69 Dillon G, Vinter LP, Winder B, Finch L. 'The guy might not even be able to remember why  
43  
44 he's here and what he's in for and why he's locked in': residents and staff experiences of  
45 18  
46 living and working alongside people with dementia who are serving prison sentences for a  
47 19  
48 sexual offence. *Psychol Crime Law* 2018;1-18. doi: 10.1080/1068316X.2018.1535063  
49 20  
50  
51 [published Online First 17 October 2018].  
52 21  
53  
54 22  
55  
56  
57  
58  
59  
60

- 1  
2  
3 1 70 Williams BA, Stern, MF, Mellow J, et al. Aging in correctional custody: Setting a policy  
4  
5 agenda for older prisoner health care. *Am J Public Health* 2012;102(8),1475-1481  
6  
7  
8 3 doi:10.2105/AJPH.2012.300704 [published Online First: 11 July 2012].  
9  
10  
11 4  
12  
13 5 71 Dementia Action Alliance. Dementia Action Alliance: About. 2018.  
14  
15 6 [https://www.dementiaaction.org.uk/who\\_we\\_are](https://www.dementiaaction.org.uk/who_we_are) (accessed 06 December 2018).  
16  
17  
18 7  
19  
20 8  
21  
22 9  
23  
24  
25  
26  
27  
28  
29  
30  
31  
32  
33  
34  
35  
36  
37  
38  
39  
40  
41  
42  
43  
44  
45  
46  
47  
48  
49  
50  
51  
52  
53  
54  
55  
56  
57  
58  
59  
60

For peer review only

1  
2  
3  
4  
5  
6  
7  
8  
9  
10  
11  
12  
13  
14  
15  
16  
17  
18  
19  
20  
21  
22  
23  
24  
25  
26  
27  
28  
29  
30  
31  
32  
33  
34  
35  
36  
37  
38  
39  
40  
41  
42  
43  
44  
45  
46  
47  
48  
49  
50  
51  
52  
53  
54  
55  
56  
57  
58  
59  
60

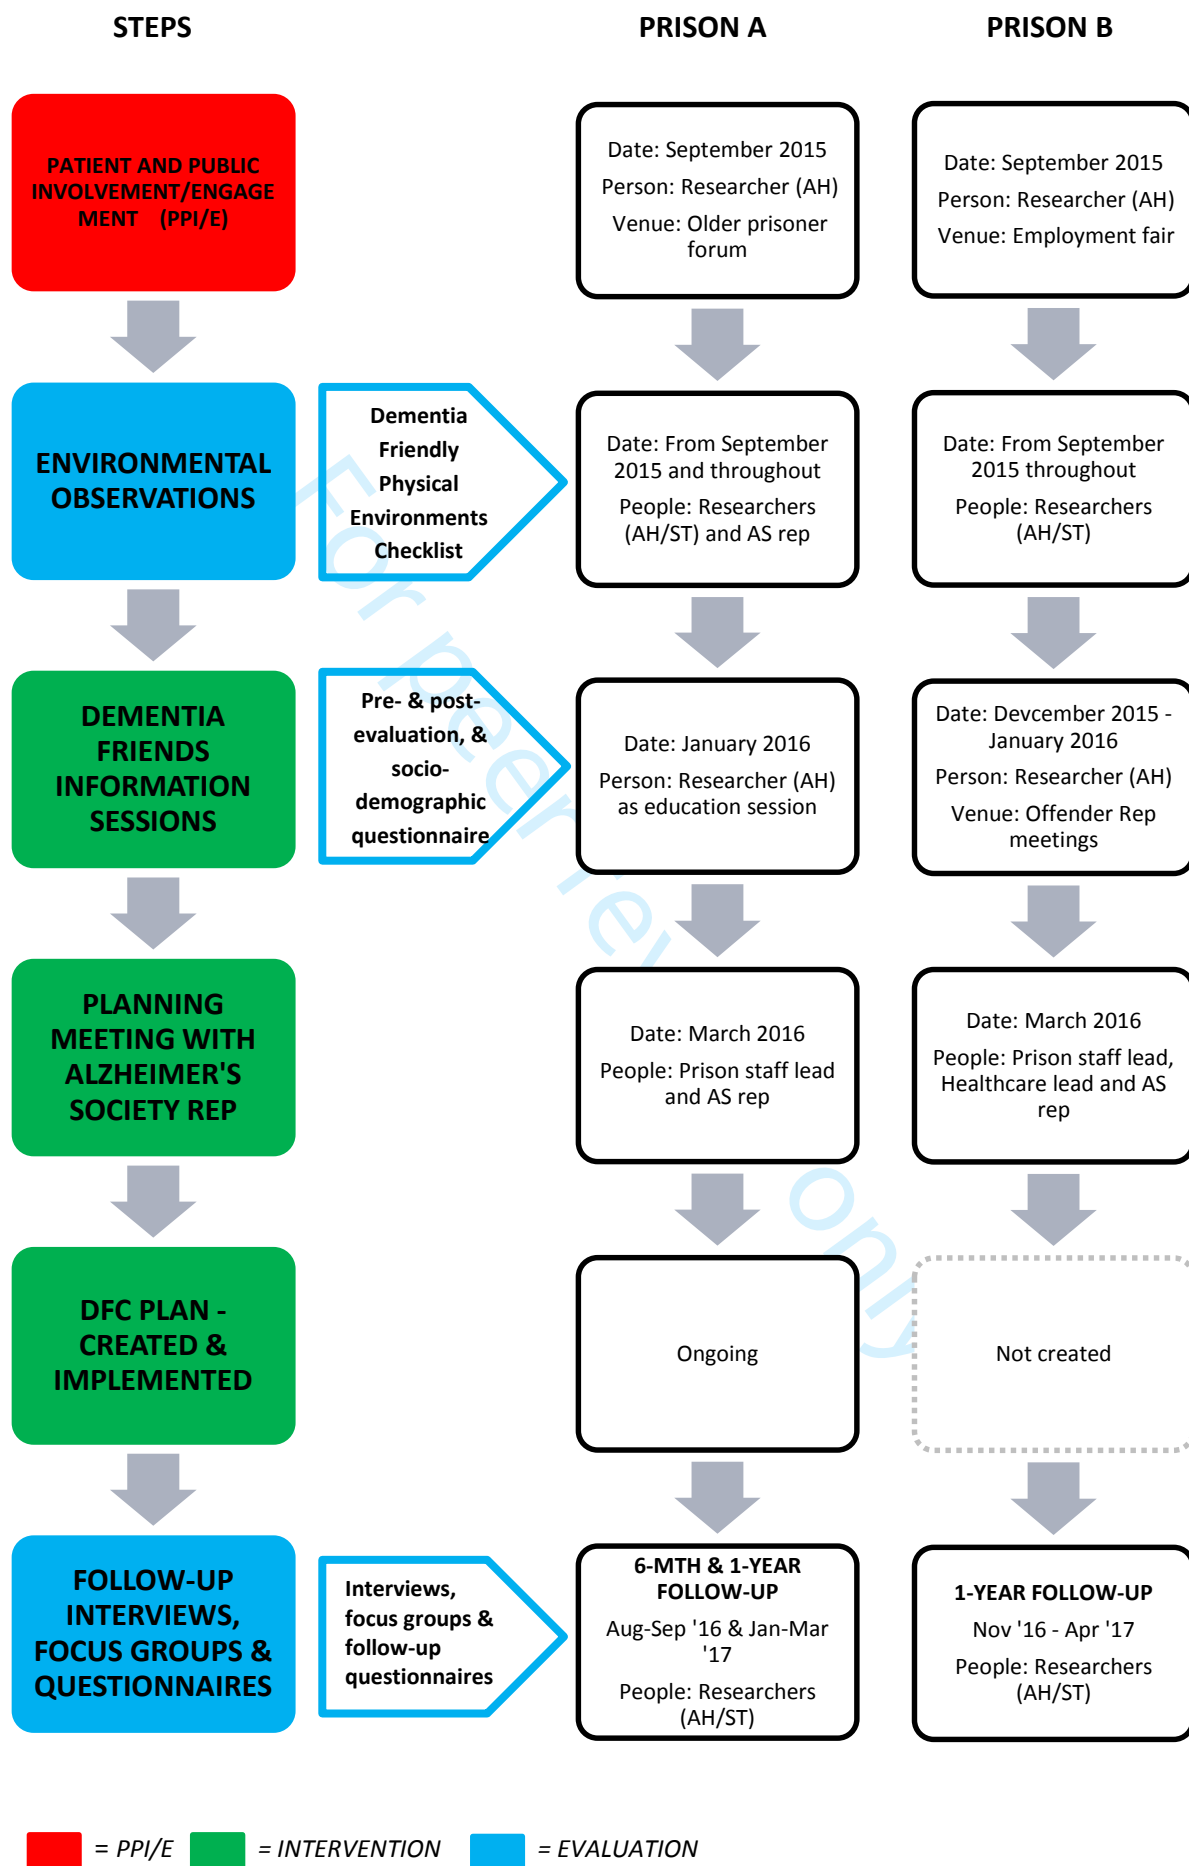

Figure 1: Steps involved in the study <http://bmjopen.bmj.com/site/about/guidelines.xhtml>

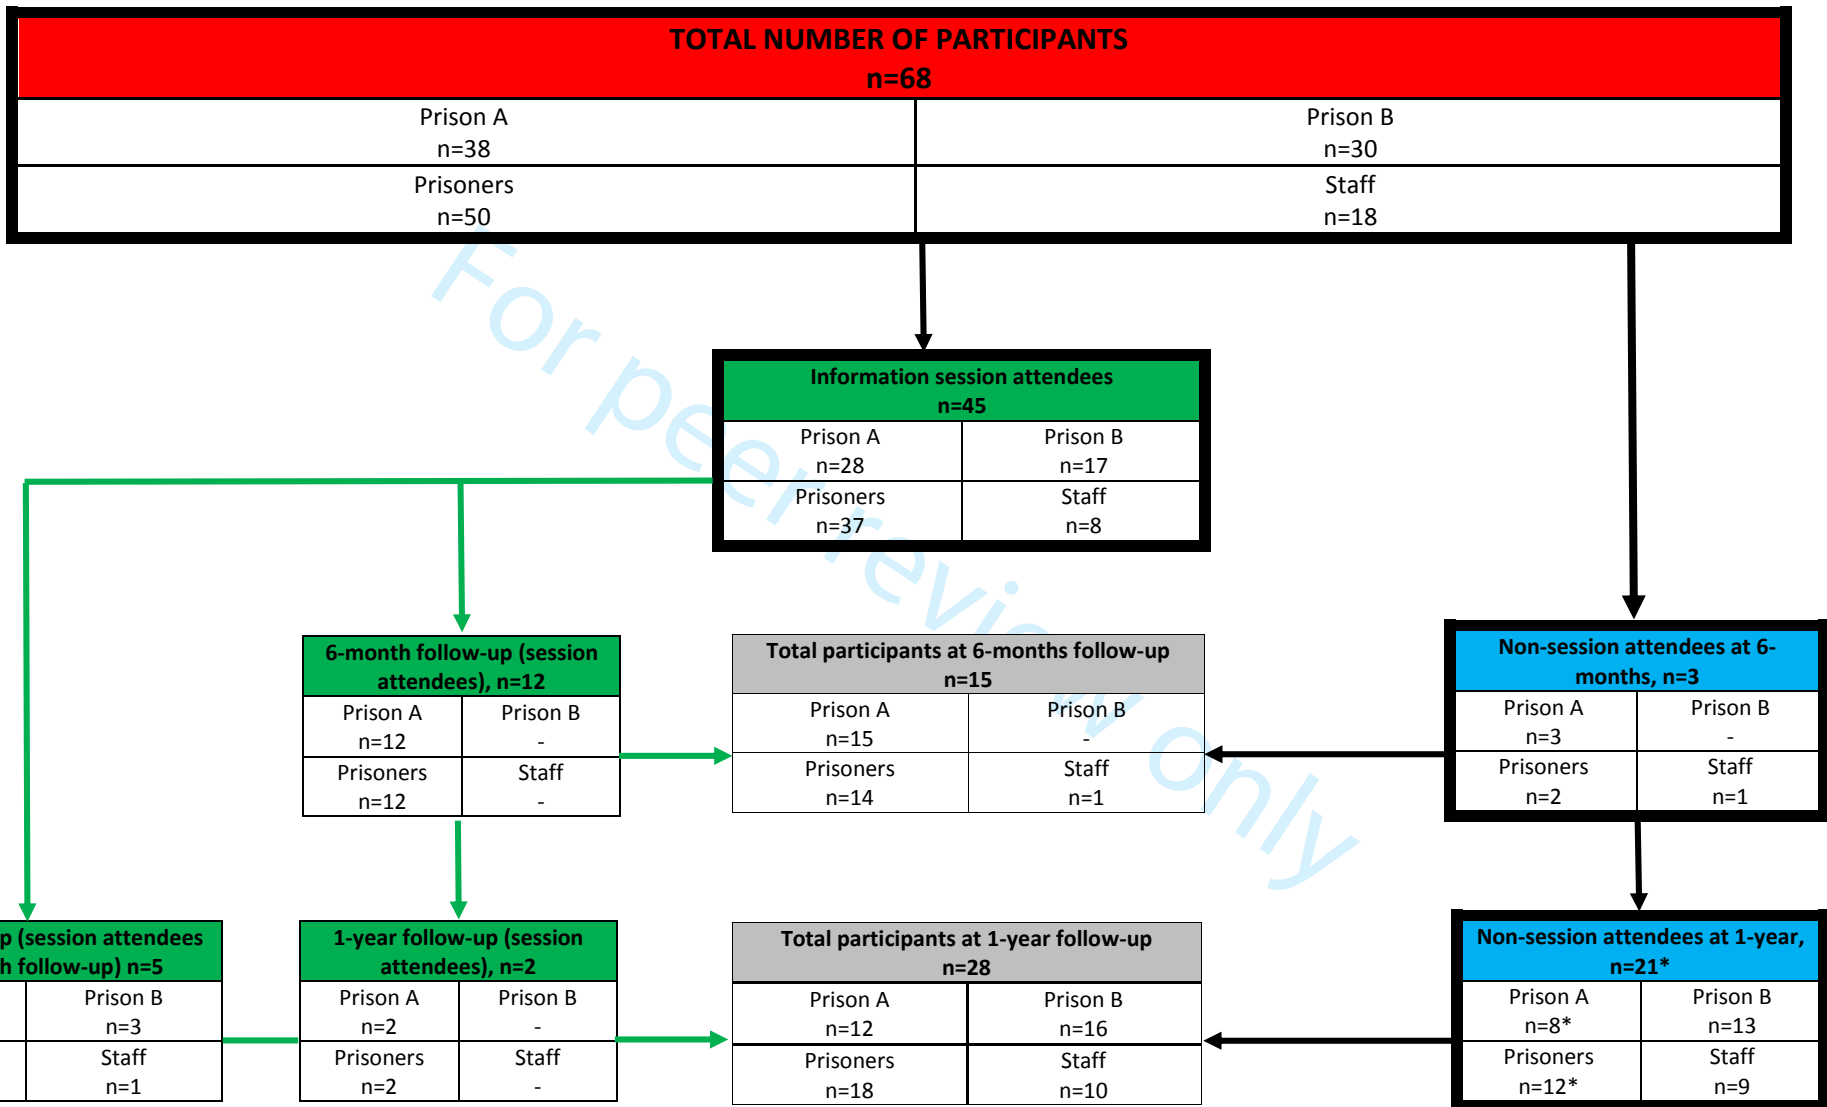

**Figure 2:** Flow of participants through the study

\* One prisoner from Prison A did not attend the information session, but was involved at both 6-month and 1-year follow-up

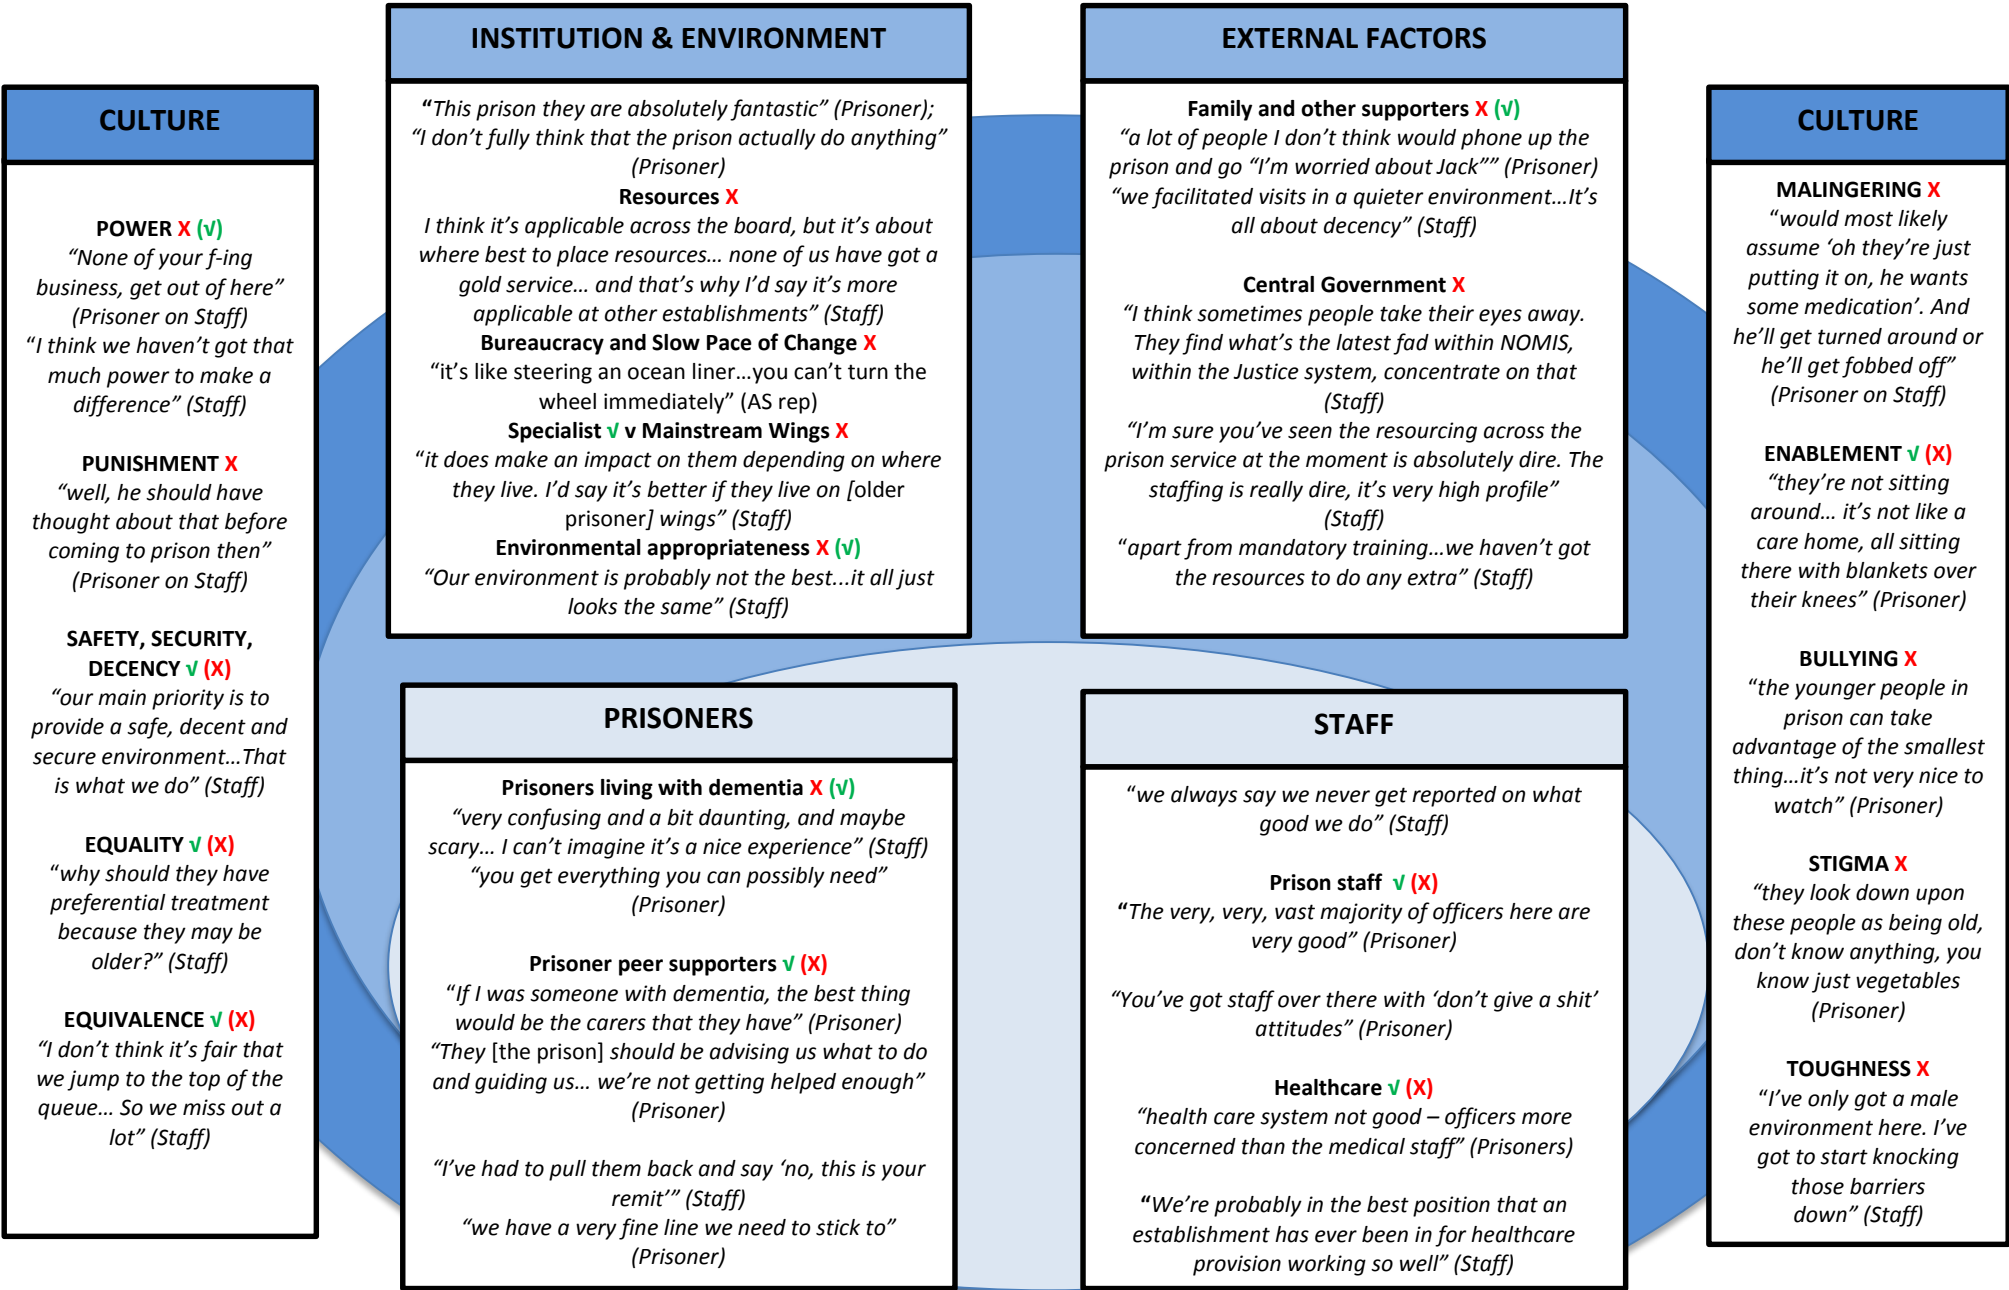

Figure 3: Barriers (X) and Facilitators (v) to applying Dementia Friendly Community principles, and their interactions

**Dementia Friendly Prisons**  
**PRE-Dementia Friends Awareness Session Questionnaire**

- 1  
2  
3  
4  
5  
6  
7  
8  
9  
10  
11  
12  
13  
14  
15  
16  
17  
18  
19  
20  
21  
22  
23  
24  
25  
26  
27  
28  
29  
30  
31  
32  
33  
34  
35  
36  
37  
38  
39  
40  
41  
42  
43  
44  
45  
46  
47  
48  
49  
50  
51  
52  
53  
54  
55  
56  
57  
58  
59  
60
1. Do you know what Dementia is? YES                      NO  
 If YES, What is it? .....
  2. On a scale of 1-10 (1 being a little and 10 being a lot) how much do you know about Dementia?  
 1            2            3            4            5            6            7            8            9            10
  3. What do you know about Dementia? (main things) .....
  4. Do you know what causes Dementia? YES                      NO  
 If YES, What? .....
  5. If you wanted to find out more about Dementia while you were in prison where would you look?  
 (Please circle all that apply).  
 Library                      Internet                      Television                      Newspaper                      Ask Prisoner Rep  
 Healthcare                      Officers                      Chaplain                      Friends                      Family                      Elsewhere (specify)
  6. Do you think there are any offenders here in HMP ..... who may have Dementia? YES            NO  
 If YES, do you think there are: a few / a lot / not sure?  
 What do you think about Dementia/people with Dementia?.....
  7. If you were worried about another offender having Dementia who would you tell? .....
  8. If you were worried about a family member having Dementia who would you tell? .....
  9. Can you think of ways you could help an offender with Dementia? Please describe: .....
  10. On a scale of 1 – 10 (1 being a little 10 being a lot) how confident would you be to talk to others  
 about Dementia?  
 1            2            3            4            5            6            7            8            9            10

1  
2  
3  
4  
5  
6  
7  
8  
9  
10  
11  
12  
13  
14  
15  
16  
17  
18  
19  
20  
21  
22  
23  
24  
25  
26  
27  
28  
29  
30  
31  
32  
33  
34  
35  
36  
37  
38  
39  
40  
41  
42  
43  
44  
45  
46  
47  
48  
49  
50  
51  
52  
53  
54  
55  
56  
57  
58  
59  
60

**11. Do you know what a Dementia Friendly Community is?** YES NO

If YES, What is it? .....

**12. Would it be useful to learn more about Dementia?** YES NO

If YES: WHY would it be useful to learn about Dementia? .....

WHAT would be useful to learn? .....

If NO: Why not? .....

**13. Do you think that if staff and offenders learn more about Dementia this will improve the lives of people with dementia in prison?** YES NO

If YES, how? .....

If NO, why not? .....

**14. Do you think it will improve the lives of everyone else?** YES NO

If YES, how? .....

If NO, why not? .....

**15. How old are you** .....

**DEMENTIA FRIENDLY COMMUNITY AIMS QUESTIONNAIRE**

Please read the 11 statements below about the experiences of people with Dementia in THIS prison, and indicate how far you agree with each one by ticking the appropriate box. Please also indicate if you believe this has changed over the last year

|                                                                                      | Strongly agree | Agree | Neither agree nor disagree | Disagree | Disagree Strongly | HAS THIS CHANGED IN THE LAST YEAR?      |                                    |                                       |
|--------------------------------------------------------------------------------------|----------------|-------|----------------------------|----------|-------------------|-----------------------------------------|------------------------------------|---------------------------------------|
|                                                                                      |                |       |                            |          |                   | YES <input type="checkbox"/> For Better | No Change <input type="checkbox"/> | NO <input type="checkbox"/> For Worse |
| The views of prisoners with Dementia are listened to                                 |                |       |                            |          |                   |                                         |                                    |                                       |
| There is a good understanding of Dementia amongst prison staff                       |                |       |                            |          |                   |                                         |                                    |                                       |
| There is a good understanding of Dementia amongst the prisoners                      |                |       |                            |          |                   |                                         |                                    |                                       |
| Prison activities are accessible and appropriate to prisoners with Dementia          |                |       |                            |          |                   |                                         |                                    |                                       |
| Prisoners with Dementia are made to feel they can make a contribution to prison life |                |       |                            |          |                   |                                         |                                    |                                       |
| Early signs of Dementia are picked up on and acted upon, by the staff                |                |       |                            |          |                   |                                         |                                    |                                       |
| People with Dementia can engage fully in prison life                                 |                |       |                            |          |                   |                                         |                                    |                                       |
| Prisoners with Dementia are supported to live as independently as possible           |                |       |                            |          |                   |                                         |                                    |                                       |
| The prison is easy to get around for people with Dementia                            |                |       |                            |          |                   |                                         |                                    |                                       |
| Prisoners with Dementia are respected                                                |                |       |                            |          |                   |                                         |                                    |                                       |
| Prisoners with Dementia face stigma and discrimination here                          |                |       |                            |          |                   |                                         |                                    |                                       |



### SUPPLEMENTARY FILE 3: ADDITIONAL SOCIO-DEMOGRAPHIC DATA FOR STUDY PARTICIPANTS

Table 1: socio-demographic data for the prisoners and staff who participated in the evaluation.

| Characteristic          | PRISON A (n=38) |      | PRISON B (n=30) |      | PRISONERS (n=50) |    | STAFF (n=18) |      | TOTAL (n=68) |      |
|-------------------------|-----------------|------|-----------------|------|------------------|----|--------------|------|--------------|------|
|                         | n               | %    | n               | %    | n                | %  | n            | %    | n            | %    |
| <b>Education</b>        |                 |      |                 |      |                  |    |              |      |              |      |
| No higher education     | 7               | 18.4 | 14              | 46.7 | 14               | 28 | 5            | 27.8 | 19           | 27.9 |
| Some higher education + | 5               | 13.2 | 12              | 40   | 12               | 24 | 7            | 38.9 | 19           | 27.9 |
| Missing                 | 26              | 68.4 | 4               | 13.3 | 24               | 48 | 6            | 33.3 | 30           | 44.1 |
| <b>Marital status</b>   |                 |      |                 |      |                  |    |              |      |              |      |
| Single                  | 7               | 18.4 | 19              | 63.3 | 22               | 44 | 4            | 22.2 | 26           | 38.2 |
| Married                 | 5               | 13.2 | 7               | 23.3 | 4                | 8  | 8            | 44.4 | 12           | 17.6 |
| Missing                 | 26              | 68.4 | 4               | 13.3 | 24               | 48 | 6            | 33.3 | 30           | 44.1 |
| <b>Children?</b>        |                 |      |                 |      |                  |    |              |      |              |      |
| Yes                     | 8               | 21.1 | 18              | 60   | 17               | 34 | 9            | 50   | 26           | 38.2 |
| No                      | 4               | 10.5 | 8               | 26.7 | 9                | 18 | 3            | 16.7 | 12           | 17.6 |
| Missing                 | 26              | 68.4 | 4               | 13.3 | 24               | 48 | 6            | 33.3 | 30           | 44.1 |
| <b>Race</b>             |                 |      |                 |      |                  |    |              |      |              |      |
| White                   | 11              | 28.9 | 22              | 73.3 | 21               | 42 | 12           | 66.7 | 33           | 48.5 |
| Other*                  | 0               | 0    | 4               | 13.3 | 4                | 8  | 0            | 0    | 4            | 5.9  |
| Missing                 | 27              | 71.1 | 4               | 13.3 | 25               | 50 | 6            | 33.3 | 31           | 45.6 |
| <b>Religion</b>         |                 |      |                 |      |                  |    |              |      |              |      |
| None                    | 2               | 5.3  | 8               | 26.7 | 5                | 10 | 5            | 27.8 | 10           | 14.7 |
| Christian               | 8               | 21.1 | 17              | 56.7 | 18               | 36 | 7            | 38.9 | 25           | 36.8 |
| Other**                 | 2               | 5.3  | 1               | 3.3  | 3                | 6  | 0            | 0    | 3            | 4.4  |
| Missing                 | 26              | 68.4 | 4               | 13.3 | 24               | 48 | 6            | 33.3 | 30           | 44.1 |
| <b>Political Views</b>  |                 |      |                 |      |                  |    |              |      |              |      |
| Conservative            | 2               | 5.3  | 4               | 13.3 | 5                | 10 | 1            | 5.6  | 6            | 8.8  |
| Moderate                | 6               | 15.8 | 14              | 46.7 | 16               | 32 | 4            | 22.2 | 20           | 29.4 |
| Liberal                 | 2               | 5.3  | 2               | 6.7  | 2                | 4  | 2            | 11.1 | 4            | 5.9  |
| Missing***              | 28              | 73.7 | 10              | 33.3 | 27               | 54 | 11           | 61.1 | 38           | 55.9 |

\*these were: Afro-Caribbean, African British, Black British, Mixed US/UK

\*\*these were: Buddhist, Muslim

1  
2  
3 There is a large amount of missing data which impacts all of the socio-demographic variables and categories (prison A/B or staff/prisoner), but  
4 has mostly affected Prison A and 'prisoners'. This makes it difficult to interpret the data as it is unclear how representative it is.  
5  
6  
7  
8  
9  
10  
11  
12  
13  
14  
15  
16  
17  
18  
19  
20  
21  
22  
23  
24  
25  
26  
27  
28  
29  
30  
31  
32  
33  
34  
35  
36  
37  
38  
39  
40  
41  
42  
43  
44  
45  
46

For peer review only

# BMJ Open

## Dementia Friendly Prisons - a mixed methods evaluation of the application of dementia friendly community principles to two prisons in England

|                                 |                                                                                                                                                                                                                                                                                                                                                                                                                                                                                                     |
|---------------------------------|-----------------------------------------------------------------------------------------------------------------------------------------------------------------------------------------------------------------------------------------------------------------------------------------------------------------------------------------------------------------------------------------------------------------------------------------------------------------------------------------------------|
| Journal:                        | <i>BMJ Open</i>                                                                                                                                                                                                                                                                                                                                                                                                                                                                                     |
| Manuscript ID                   | bmjopen-2019-030087.R2                                                                                                                                                                                                                                                                                                                                                                                                                                                                              |
| Article Type:                   | Research                                                                                                                                                                                                                                                                                                                                                                                                                                                                                            |
| Date Submitted by the Author:   | 25-Jun-2019                                                                                                                                                                                                                                                                                                                                                                                                                                                                                         |
| Complete List of Authors:       | Treacy, Samantha; University of Cambridge Department of Public Health and Primary Care, Cambridge Institute of Public Health<br>Haggith, Anna; University of Cambridge, Cambridge Institute of Public Health<br>Wickramasinghe, Nuwan; University of Cambridge, Cambridge Institute of Public Health; Rajarata University of Sri Lanka Faculty of Medicine and Allied Sciences, Department of Community Medicine<br>Van Bortel, Tine; University of Cambridge, Cambridge Institute of Public Health |
| <b>Primary Subject Heading</b>: | Public health                                                                                                                                                                                                                                                                                                                                                                                                                                                                                       |
| Secondary Subject Heading:      | Mental health                                                                                                                                                                                                                                                                                                                                                                                                                                                                                       |
| Keywords:                       | Prisoner health, Older prisoners, Peer support, Environment, Awareness raising, Dementia < NEUROLOGY                                                                                                                                                                                                                                                                                                                                                                                                |
|                                 |                                                                                                                                                                                                                                                                                                                                                                                                                                                                                                     |

SCHOLARONE™  
Manuscripts

1  
2  
3 1 **Dementia Friendly Prisons - a mixed methods evaluation of the application of dementia**  
4  
5  
6 2 **friendly community principles to two prisons in England**  
7  
8

9 3  
10  
11  
12 4 **\*Samantha Treacy**, Cambridge Institute of Public Health, University of Cambridge, School of  
13  
14  
15 5 Clinical Medicine, Cambridge Biomedical Campus, Forvie Site, Robinson Way, Cambridge  
16  
17 6 CB2 0SR, UK; [st617@medschl.cam.ac.uk](mailto:st617@medschl.cam.ac.uk); Tel No: +44 1223 330321  
18  
19  
20 7

21  
22 8 **Anna Haggith**, Cambridge Institute of Public Health, University of Cambridge, UK  
23  
24  
25 9

26  
27 10 **Dr Nuwan Darshana Wickramasinghe**, Cambridge Institute of Public Health, University of  
28  
29 11 Cambridge, UK; Department of Community Medicine, Rajarata University of Sri Lanka, Sri  
30  
31 12 Lanka  
32  
33

34 13  
35  
36 14 **Dr Tine Van Bortel**, Cambridge Institute of Public Health, University of Cambridge, UK  
37  
38  
39  
40 15

41  
42 16

43  
44 17

45  
46 18

47  
48 19

49 19 Word Count 4,984

50  
51 20 \*Corresponding author  
52  
53 21

54  
55 22

56  
57 23

58  
59  
60 23



1  
2  
3 1 facilitators included aspects of the prison institution and environment, staff teams,  
4  
5  
6 2 prisoners, prison culture and external factors.  
7  
8

9 3 **Conclusions:** DFC principles appear to be acceptable to prisons with some promising  
10  
11 4 progress and results found. However, a lack of Government funding and strategy to focus  
12  
13 5 action around the escalating numbers of older prisoners and those living with dementia  
14  
15  
16 6 appears to contribute to a context where interventions targeted at this highly vulnerable  
17  
18 7 group can be deprioritised. A more robust evaluation of this intervention on a larger scale  
19  
20  
21 8 over a longer period of time would be useful to assess its utility further.  
22  
23

24 9

25  
26  
27  
28 10

29  
30  
31 11

32  
33  
34  
35 12

36  
37  
38 13

39  
40  
41  
42 14

43  
44  
45  
46 15

47  
48  
49 16

50  
51  
52  
53 17

54  
55  
56 18

57  
58  
59  
60

## ARTICLE SUMMARY

### Strengths and limitations of this study

- This is the first study published exploring the applicability of dementia friendly community principles in prisons that we have found, and is one of the only studies published worldwide to evaluate the support and/or management of prisoners living with dementia.
- The PPI component of the study was invaluable in establishing the need for dementia-focused work, targeting the intervention and preparing study materials
- Involving people with dementia and their families in the intervention was particularly difficult to achieve in a prison context.
- The relatively small sample size coupled with high prisoner and personnel turnovers made quantitative analysis challenging, and conducting the study in male prisons only is a limitation.
- The number of participants interviewed and involved in focus group discussions provided a rich set of data to explore findings.

### KEYWORDS

Dementia, prisoner health, older prisoners, peer support, environment, awareness raising

## INTRODUCTION

1  
2  
3  
4 1  
5  
6 2 The number of prisoners over the age of 50<sup>1</sup> in England and Wales has tripled since 2002,  
7  
8 3 and now represents 16.3% of the overall prison population.[1] This is projected to rise  
9  
10 4 further in future.[2-3] Health problems and social care needs are reportedly extensive  
11  
12 5 among this group, estimated to affect over 85% of older prisoners, which has been  
13  
14 6 associated with an approximately three-fold increase in the financial costs of  
15  
16 7 accommodating them compared to the 'general' prisoner population.[4-8] The number of  
17  
18 8 prisoners diagnosed with dementia specifically is unknown, but is at least commensurate  
19  
20 9 with community levels, although likely to be much higher due to the poorer health and  
21  
22 10 lifestyles of prisoners, and the effects of a prison system built for younger, fitter  
23  
24 11 prisoners.[4-5, 9-12] Additionally, people living with dementia in prisons may have harsher  
25  
26 12 prison experiences than their more cognitively able counterparts, which can exacerbate  
27  
28 13 their symptoms, as they are more likely to be vulnerable to victimisation, isolation, and  
29  
30 14 punishment for failing to 'comply' with prison routines.[5, 10, 13-17] It is a matter of  
31  
32 15 national policy that prisons provide a standard of care equivalent to that in the  
33  
34 16 community,[18-19] but a recent parliamentary inquiry has stated that despite some areas of  
35  
36 17 good practice, the government is failing in its duty of care to prisoners in England and  
37  
38 18 Wales.[20]  
39  
40  
41  
42  
43  
44  
45  
46  
47  
48  
49  
50 20 Dementia has become a health and social care policy priority in the UK, with the  
51  
52 21 Governments' dementia strategy promoting the establishment of Dementia Friendly  
53  
54 22 Communities [DFCs],[21-22] defined as places "where people with dementia are  
55  
56 23 understood, respected and supported".[23, p1] Key DFC principles include: the  
57  
58 24 empowerment and involvement of people with dementia in the formation and  
59  
60



1  
2  
3 1 development of communities, increased dementia awareness, challenging stigma, timely  
4  
5  
6 2 access to care, and supportive social and physical environments.[23] Evaluations of DFCs in  
7  
8 3 UK communities mostly reported increases in dementia awareness, but progress on social  
9  
10 4 and environmental change varied and the involvement of people living with dementia were  
11  
12  
13 5 limited in the short-term.[24-30] There have been no published evaluations that we have  
14  
15 6 found applying DFC principles in prisons in England and Wales, nor of any other intervention  
16  
17 7 targeted at people living with dementia in prisons internationally.[31,32] Given the human  
18  
19 8 rights and financial concerns surrounding the imprisonment of people with dementia,[12,  
20  
21 9 33-35] it seems imperative to explore, implement and evaluate programmes focused on  
22  
23 10 supporting this highly vulnerable population.  
24  
25  
26  
27  
28  
29

## 30 **RESEARCH AIMS**

31  
32 13 This study aimed to explore the application of the Alzheimer's Society Dementia Friendly  
33  
34 14 Community principles to two prisons. The research questions were:  
35  
36  
37  
38  
39

- 40 16 1) What progress was made towards applying DFC principles at each prison, following  
41  
42 17 an intervention comprised of information sessions and meetings with the  
43  
44 18 Alzheimer's Society?  
45  
46  
47 19 2) What was the impact of the intervention?  
48  
49  
50 20 3) What contextual factors affected implementation of the intervention and DFC  
51  
52 21 principles?  
53  
54  
55  
56  
57  
58  
59  
60

## METHOD

### STUDY DESIGN

The research was structured as a small-scale pilot study and process evaluation, employing a mixed methods design, with a one-year follow-up period. It was conducted in three stages:

- (i) Patient and Public Involvement (PPI)<sup>2</sup> - the involvement of prisoners in the research process was essentially preparatory, establishing the need for dementia-related interventions at each prison, identifying the people and site for the intervention, and assisting in modifying evaluation materials; actions arising from this involvement were relayed to the prisoners. Prisoners were not directly involved in delivering the intervention, recruiting participants nor conducting the evaluation. Prisoner involvement was not formally evaluated, and so no further findings are reported from this stage of the study.
- (ii) Intervention – delivery of hour-long Dementia Friends Alzheimer’s Society [AS] information sessions (<https://www.dementiafriends.org.uk/WEBRequestInfoSession>), and meetings between prison staff and AS to plan and implement DFC-led alterations.
- (iii) Evaluation – of the information session, of progress towards implementing DFC principles, and of contextual factors affecting their application, using questionnaires pre- and post-information session and at follow-up, and individual interviews and focus groups at follow-up.

The sequencing of these three stages across the study are shown in Figure 1:

<Figure 1: Study steps>

## 1      2 3      1      **CONTEXT**

4  
5  
6      2      This study was conducted in two prisons in the East of England. Prison A was a Category C  
7  
8      3      sex offender prison with 34.2% of the population aged over 50,[36] and two opt-in 120 bed  
9  
10      4      wings for older prisoners (aged >60 years) which had had some adaptation (stair lifts, quiet  
11  
12      5      room). There was also a prison-wide policy for older prisoners to be unlocked through the  
13  
14      6      day. There were reportedly between zero and four prisoners diagnosed with dementia  
15  
16      7      across the course of the study. Prison B was predominantly a local prison<sup>3</sup> with 16.1% of the  
17  
18      8      population over 50,[37] and a 26-bed wing for older prisoners. In addition, there was a 15-  
19  
20      9      bed palliative and significant social care needs wing, with environmental adaptations  
21  
22      10      (normalised dining area, hospital-type beds), which reportedly held five prisoners diagnosed  
23  
24      11      with dementia at follow-up, and ran a cognitive stimulation group. This prison also had 24-  
25  
26      12      hour healthcare staff and an inpatient wing. Both prisons had some prison-wide activities  
27  
28      13      focused on older prisoners (such as dedicated gym/library sessions).  
29  
30  
31  
32  
33  
34  
35  
36  
37  
38  
39

## 40      15      **PARTICIPANTS**

41  
42  
43      16      Forty-six prisoners were involved in the PPI phase of the study (16 from Prison A, and 30  
44  
45      17      from Prison B). A total of 68 individuals (50 prisoners and 18 staff) participated in the  
46  
47      18      Intervention and Evaluation stages of the study, as detailed in Figure 2:  
48  
49  
50

### 51      19      <Figure 2: Flow of participants>

52  
53  
54      20      Forty-five individuals (37 prisoners and 8 staff) attended information sessions, invited by the  
55  
56      21      staff who were leading for the study within each prison, as selected by each prisons' No 1  
57  
58      22      Governor. Invitations were extended to those likely to be involved in supporting people with  
59  
60

1 dementia at the prisons and included: older prisoners, prisoner peer supporters and staff  
2 working on specialist (older prisoner or health-oriented) wings. Information session  
3 attendees were also asked for their consent to be approached to participate in the follow-  
4 up evaluation, and were invited to do so by researchers and prison staff leads. Twelve  
5 attendees (all prisoners) from prison A participated at 6-months, and a total of seven  
6 attendees (6 prisoners and 1 staff member) from both prisons participated at 1-year follow-  
7 up. Only two attendees participated at both 6-month and 1-year follow-up, both prisoners.

8  
9 The remaining 23 follow-up evaluation participants (13 prisoners and 10 staff) who did not  
10 attend the information sessions, were comprised of prison staff who led on or participated  
11 in the intervention implementation at the prisons (who were invited to take part in the  
12 evaluation by the research team), and of additional prisoner peer supporters and prison  
13 officers who were interested in dementia at the prisons (who were invited by the prison  
14 staff leads). One person with dementia participated in PPI at Prison A, but none were  
15 involved in the evaluation, as far as we were aware. The reasons for this are somewhat  
16 unclear, as the research team was not directly involved in recruiting prisoners.

## 18 MATERIALS

19 Information sheets and consent forms were developed by the research team and modified  
20 according to National Offender Management Service [NOMS] specification. The rest of the  
21 materials used were:

- 1  
2  
3 1 (a) Alzheimer’s Society Foundation Criteria for the Dementia-Friendly Communities  
4  
5  
6 2 Recognition Process.[38]  
7  
8 3 (b) Socio-demographic questionnaire (gender, age, education level, marital status, race,  
9  
10 4 children, religion, politics).  
11  
12  
13 5 (c) Study-specific Information Session Evaluation questionnaire developed by the  
14  
15 6 research team, and modified following prisoner feedback. The questionnaire  
16  
17 7 contained open and closed questions on knowledge, learning and confidence  
18  
19 8 regarding dementia. (see Supplementary File 1)  
20  
21  
22  
23 9 (d) Study-specific Dementia Friendly Prisons Aims questionnaire, developed by the  
24  
25 10 research team, based on the key DFC principles.[23] (see Supplementary File 2)  
26  
27  
28 11 (e) The ‘Dementia Friendly Physical Environments Checklist’.[39]  
29  
30 12 (f) Semi-structured interview schedules and focus group frameworks formulated by the  
31  
32 13 research team, focused on the information session, support and barriers for people  
33  
34 14 with dementia, and prison dementia friendliness.  
35  
36  
37  
38  
39  
40  
41  
42  
43  
44  
45  
46  
47  
48  
49  
50  
51  
52  
53  
54  
55  
56  
57  
58  
59  
60

## 16 PROCEDURES

17 As shown in Figure 1, both prisons facilitated PPI activities, and hosted dementia  
18 information sessions at which pre- and post-session evaluation questionnaires were  
19 collected. Due to sessions over-running, there were difficulties collecting the socio-  
20 demographic questionnaire at Prison A. Both prisons’ study leads met with AS  
21 representatives, but only Prison A created and implemented DFC plans, at which a six-  
22 month interim follow-up occurred due to rapidly falling numbers of information session  
23 attendees. A full one-year follow-up was conducted at both prisons.

1  
2  
3 1  
4  
5  
6  
7 2 At both follow-up points, evaluation and dementia aims questionnaires were collected, and  
8  
9 3 interviews and focus groups conducted. Across the follow-up evaluation, 11 interviews were  
10  
11 4 conducted with prison staff at suitable locations within and outside of the prison, and six  
12  
13 5 with prisoners during legal visits. All interviews were taped, and one staff interview was  
14  
15 6 scribed by a researcher. A further 24 prisoners participated in focus groups, which were  
16  
17 7 documented on flip chart paper as permission to tape had not been sought in time. In  
18  
19 8 addition, AS representatives (workers identified by AS to work with the prisons for this  
20  
21 9 study) were interviewed, and were invited to do so by the researchers. Prisoners were  
22  
23 10 selected for interview based on the type of peer supporter role they occupied, i.e. those  
24  
25 11 providing direct care assistance to people with dementia (for example, care support  
26  
27 12 orderlies, wheelchair pushers), those providing indirect assistance as a secondary part of  
28  
29 13 their roles (such as library assistants), and prisoner representatives (who represent the  
30  
31 14 views of prisoners at meetings with prison management). The remaining prisoners  
32  
33 15 participated in focus groups.  
34  
35  
36  
37  
38  
39  
40  
41  
42 16  
43  
44  
45 17 Informed consent was sought from all participants prior to interviews or focus groups, with  
46  
47 18 researchers going through information sheets and consent forms with potential  
48  
49 19 participants, answering any questions that arose.  
50  
51  
52  
53 20  
54  
55  
56 21 **DATA ANALYSIS**  
57  
58  
59 22 *Quantitative analysis*  
60

1  
2  
3 1 The data were extracted from the questionnaires by a researcher (ST) who was not involved  
4  
5 2 in the intervention, and entered onto a dataset created using SPSS version 23.[40] One  
6  
7 3 researcher (NDW), who was not involved in either the intervention nor data collection,  
8  
9 4 conducted an independent double-check to identify any incompatible entries. Both  
10  
11 5 researchers (NDW, ST) analysed the data using SPSS. Statistical analysis focused on pre- and  
12  
13 6 post-session and follow-up changes using Chi-squared, McNemar, or Wilcoxon signed-rank  
14  
15 7 tests ( $p < 0.05$ ).  
16  
17  
18  
19  
20  
21  
22  
23

### 24 9 *Qualitative analysis*

25  
26  
27 10 All taped interviews were transcribed verbatim which together with focus group flipcharts,  
28  
29 11 were subject to a Framework Analysis.[41] This approach was selected as it could  
30  
31 12 accommodate differing data sources, and provided a clear and systematic structure for a  
32  
33 13 team-based analysis. Using an inductive approach, all researchers: (i) read interviews and  
34  
35 14 noted initial themes; (ii) analysed five transcripts in-depth, noting further themes; (iii) based  
36  
37 15 on this created an analytical framework with main emergent themes; (iv) used this  
38  
39 16 framework to 'code' all material - two researchers independently categorised each  
40  
41 17 transcript using NVivo 11[42] or MS Word[43]; (v) analyses were combined and summarised  
42  
43 18 in an MS Excel[44] spreadsheet, with differences resolved within the team; and (vi) findings  
44  
45 19 were interpreted.  
46  
47  
48  
49  
50  
51  
52  
53  
54  
55

## 56 21 **RESULTS**

### 57 22 **SAMPLE CHARACTERISTICS**

1  
2  
3 1 A total of 68 individuals (50 prisoners and 18 staff) participated in the Intervention and  
4  
5 2 Evaluation stages of the study. The majority of prisoners identified as male (n=49, 98%), and  
6  
7 3 one prisoner identified as transgender. Conversely, the staff sample was mostly composed  
8  
9 4 of females (n=11, 79%, missing =4). The mean age of the sample was 45.3 years, and ranged  
10  
11 5 from 23-76 years (missing=8). The mean age of the prisoner participants from Prison A (50.6  
12  
13 6 years) was almost 10 years higher than the prisoner participants of Prison B (40.9 years).  
14  
15 7 This difference was statistically significant ( $t(44)=2.793, p=0.008$ ). The overall mean age  
16  
17 8 differences between prisons and between prisoners and staff were not statistically  
18  
19 9 significant. With regards to the other socio-demographic variables, there were a large  
20  
21 10 number of missing data making these difficult to interpret, however they have been  
22  
23 11 included as Supplementary File 3.  
24  
25  
26  
27  
28  
29  
30  
31  
32  
33

### 34 **KEY FINDINGS**

35  
36  
37 14 This section will discuss the three research questions on progress, impact and context that  
38  
39 15 this study sought to answer, and present an analysis of each.  
40  
41  
42  
43  
44  
45

#### 46 **RESEARCH QUESTION 1: PROGRESS**

47  
48  
49 18 Both prisons agreed to participate and engaged in the project and evaluation, but they  
50  
51 19 differed in the extent of their engagement. Progress was measured against Alzheimer's  
52  
53 20 Society criteria,[38] which is summarised in Table 1 for each prison.  
54  
55  
56  
57

58 **<Table 1 here>**  
59  
60



**Table 1: Progress as measured against Alzheimer's Society Foundation Criteria (2014)**

| CRITERIA                                                        | PRISON A                                                                                                                                                                                                                                                                                                                                                                                                                                        | PRISON B                                                                                                                                                                                                                                            |
|-----------------------------------------------------------------|-------------------------------------------------------------------------------------------------------------------------------------------------------------------------------------------------------------------------------------------------------------------------------------------------------------------------------------------------------------------------------------------------------------------------------------------------|-----------------------------------------------------------------------------------------------------------------------------------------------------------------------------------------------------------------------------------------------------|
| 1. Create or join a Dementia Action Alliance (DAA)              | (i) Joined the local DAA, attended regularly by prison staff<br>(ii) Prison-only steering group not set up                                                                                                                                                                                                                                                                                                                                      | The prison did not join nor create a DAA or similar                                                                                                                                                                                                 |
| 2. Identify a community leader                                  | There was a lead person liaising with the AS rep throughout. This changed several times across the study                                                                                                                                                                                                                                                                                                                                        | The identified lead met with the AS rep once, but a dementia friendly community was not worked towards.                                                                                                                                             |
| 3. Have an awareness raising plan                               | (i) Information sessions delivered largely to prisoner peer supporters as part of this research; AS rep delivered further session at a prisoner conference<br>(ii) Two staff members trained as dementia champions enabling them to deliver awareness sessions<br>(iii) Information session placed on staff training rotation, delivered by a staff dementia champion<br>(iv) Awareness raising was a part of the prisons' dementia action plan | (i) Information sessions delivered to prisoner peer supporters, and some healthcare and prison staff as part of the research<br>(ii) No known ongoing plan to raise dementia awareness at the prison, and no further information sessions delivered |
| 4. Involvement of people living with dementia, and their carers | (i) Prisoner peer supporters were asked for opinions, but the project was staff-led primarily<br>(ii) Little formal contact between AS rep and prisoners<br>(iii) No known involvement of family or friends of people with dementia                                                                                                                                                                                                             | Prison not working towards establishing a dementia friendly community within this project, so no prisoner nor family or friends involved.                                                                                                           |
| 5. Publicise the work of the community                          | (i) The dementia action plan was posted on the DAA website<br>(ii) The AS rep was a speaker at a prison-wide conference for prisoner peer supporters<br>(iii) Staff working outside of specialist wings appeared unaware of the project                                                                                                                                                                                                         | (i) There was no dementia friendly community plan<br>(ii) A prisoner who attended the information session as part of this research, used the information to create an edition of the in-house prisoner magazine focused on dementia                 |
| 6. Focus the action plans on two or three key priorities        | A dementia action plan was created focused on: raising awareness; improving the physical environment; and working with partners inside and outside the prison                                                                                                                                                                                                                                                                                   | No dementia action plan was created                                                                                                                                                                                                                 |
| 7. Have a 6-month and annual evaluation plan                    | (i) The prison participated in the research evaluation. The prison was continuing to work with AS and DAA, but unclear about ongoing plans to evaluate                                                                                                                                                                                                                                                                                          | The prison participated in the research evaluation – no further evaluation plans made                                                                                                                                                               |

1  
2  
3 1 Prison A met a number of the criteria which included joining a local Dementia Action  
4  
5 2 Alliance<sup>4</sup>, creating a DFC plan which was posted on the internet, running awareness raising  
6  
7 3 events, and making small environmental changes – such as having planters in a specialist  
8  
9 4 wing yard. Actions in these areas were reportedly ongoing although slow, and mostly  
10  
11 5 implemented within the older prisoner wings:  
12  
13  
14  
15  
16  
17  
18  
19  
20  
21  
22  
23  
24  
25  
26  
27  
28  
29  
30  
31  
32  
33  
34  
35

36  
37  
38  
39  
40  
41  
42  
43  
44  
45  
46  
47  
48  
49  
50  
51  
52  
53  
54  
55  
56  
57  
58  
59  
60

7 *“I feel I’ve been so lucky to be involved in this project...it’s one of the few places  
8 that I’ve been where they’ve actually listened... and it’s slow, but it’s going to be  
9 slow, you just have to accept that. But, they do listen, and every time I go  
10 ...something has happened in relation to what I’ve talked about previously. And  
11 that is so unique” (Prison project worker).*

12  
13 Whilst Prison B engaged with the intervention initially (hosting information sessions and  
14 meeting with an AS representative), there was little progress beyond this, with few AS  
15 criteria met and no DFC plans created. The lack of continued engagement largely centred  
16 around there being lower numbers of older prisoners at this prison, with other issues  
17 prioritised as a result, and the belief that services for people with dementia at the prison  
18 were good enough already. A prisoner at Prison B did use the information session materials  
19 to produce an edition of the prison magazine focused on dementia, and the difficulty of  
20 being in prison when family are experiencing dementia or supporting others with dementia.

21  
22 **RESEARCH QUESTION 2: IMPACT**

1  
2  
3 1 Within this study, impact was assessed using study specific questionnaires evaluating (i) the  
4  
5 2 dementia information session, and (ii) whether DFC aims were met, and if changes were  
6  
7 3 made by the prison to support these. As no DFC plans were made or implemented at Prison  
8  
9 4 B, analysis of questionnaire (ii) will only be presented for Prison A. Quantitative results will  
10  
11 5 also be augmented by interview and focus group analyses.  
12  
13  
14  
15  
16  
17

18 7 *(a) Information session evaluation*

19  
20 8 Participants completed questionnaires evaluating the information session pre- (n=45) and  
21  
22 9 post-session (n=40), and at six-months (n=12) and one-year follow-up (n=7). This was also  
23  
24 10 explored further in interviews and focus groups. Table 2 shows data taken from the  
25  
26 11 questionnaires across the evaluation period:  
27  
28  
29

30 12 **<Table 2 here>**

31  
32 13 All of the responses concerning perceived knowledge of dementia increased post-session,  
33  
34 14 reaching statistical significance for level of knowledge about dementia, its causes and  
35  
36 15 dementia friendly communities. Participants also reported feeling more confident talking to  
37  
38 16 people with dementia post-awareness session. At 6-months and one-year follow-up,  
39  
40 17 participants continued to report that they knew more about dementia than they had pre-  
41  
42 18 awareness session, differences which were statistically significant. Unsurprisingly, no results  
43  
44 19 were significant for the three participants sampled at both 6-months and 1-year follow-up.  
45  
46  
47  
48  
49  
50  
51  
52

53 21 Some participants also reported that the session altered the way they supported people  
54  
55 22 living with dementia in the prison, with a positive knock-on effect on those relationships.  
56  
57  
58  
59  
60

**Table 2: Descriptive statistics and comparative analyses of awareness session questionnaires**

|                                                                                                                 | PRE-COMPARISON ANALYSIS                    |                                           |                                            | POST-COMPARISON ANALYSIS                   |                                         | FOLLOW-UP ANALYSIS          |
|-----------------------------------------------------------------------------------------------------------------|--------------------------------------------|-------------------------------------------|--------------------------------------------|--------------------------------------------|-----------------------------------------|-----------------------------|
|                                                                                                                 | Pre-Post<br>(n=38)                         | Pre - 6-mth<br>(n=12)                     | Pre - 1-year<br>(n=7)                      | Post - 6 mth<br>(n=11)                     | Post - 1-year<br>(n=5)                  | 6-mth – 1 year<br>(n=3)     |
| <b>Do you know what dementia is?</b><br>(N° Yes, %; significance level)*                                        | 31(86.1)-36(100)<br>p=0.063<br>2 missing   | n/a                                       | n/a                                        | n/a                                        | n/a                                     | n/a                         |
| <b>How much do you know about dementia?</b><br>(median; significance/level)**                                   | 4 - 7<br>Z=-4.594,<br>p<0.001<br>1 missing | 5 - 6<br>Z=-2.831, p=<br>0.005            | 5 - 6<br>Z=-2.232, p=0.026                 | 7 - 6<br>Z=-1.311, p=0.190                 | 7 - 4<br>Z=0, p=1.000<br>1 missing      | 6 - 4<br>Z=-1.414, p=0.157  |
| <b>Do you know the causes of dementia?</b><br>(N° Yes, %; Significance level)*                                  | 7(25) – 24(85.7)<br>p<0.001<br>10 missing  | n/a                                       | n/a                                        | n/a                                        | n/a                                     | n/a                         |
| <b>Do you know what a dementia friendly community is?</b><br>(N° Yes, %; Significance level)*                   | 13(44.8)-26(89.7)<br>p<0.001<br>9 missing  | 7(70.0) - 9(90.0)<br>p=0.500<br>2 missing | 1(16.7) – 5 (83.3)<br>p=0.125<br>1 missing | 9(90.0) – 8(80.0)<br>p=1.000<br>1 missing  | 3(100) – 3(100)<br>p=1.000<br>2 missing | 3(100)– 3(100)<br>p=1.000   |
| <b>Did the awareness session increase your knowledge/did you learn?</b><br>(No, %; Significance level)*         | n/a                                        | n/a                                       | n/a                                        | 10 (100)– 9 (90.0)<br>p=1.000<br>1 missing | 4 – 4 (100)<br>p=1.000<br>1 missing     | 3(100) – 3 (100)<br>p=1.000 |
| <b>Confidence in talking about dementia to others?</b><br>(median; significance/level)**                        | 5 – 7<br>Z=-3.917,<br>p<0.001<br>8 missing | 5 - 7<br>Z=-0.854,<br>p=0.393             | 5 – 6<br>Z=-1.069, p=0.285<br>3 missing    | 7 - 7<br>Z=-1.897, p=0.058                 | 7 - 6<br>Z=0, p=1.000<br>1 missing      | 7 - 6<br>Z=0, p=1.000       |
| <b>Confidence in helping people living with dementia?</b><br>(median; significance/level)**                     | n/a                                        | n/a                                       | n/a                                        | n/a                                        | n/a                                     | 8 – 7<br>Z=0, p=1.000       |
| <b>Did the awareness session change your views on people with dementia?</b><br>(N° Yes, %; Significance level)* | n/a                                        | n/a                                       | n/a                                        | n/a                                        | n/a                                     | 3 – 3 (100)<br>p=1.000      |

\*Significance testing using exact McNemar's test

\*\*Significant testing using Wilcoxon signed-rank test

 = statistically significant

1  
2  
3 1 There were also reports of participants finding the information personally comforting and  
4  
5  
6 2 useful in supporting colleagues, and also extending to their communities of friends and  
7  
8 3 family outside of prison:  
9

10  
11 4  
12  
13  
14 5 *“For me it helped me mostly because my grandad suffers with dementia... for me*  
15  
16  
17 6 *[the information session] put my mind at ease a lot with that and helped me.*  
18  
19 7 *And I talked with my mum and my grandma about it a lot more because of that,*  
20  
21  
22 8 *because I felt a bit more confident having that knowledge” (Prisoner)*  
23  
24

25 9  
26  
27  
28  
29 10 (a) *Dementia Friendly Prison Aims*

30  
31 11 Table 3 shows study participants’ views on whether Prison A met DFC aims at 6 months  
32  
33 12 (n=15) and 1-year follow-up (n=12), using the DFC aims questionnaire. These were largely  
34  
35 13 independent samples, therefore a comparative analysis was not possible.  
36  
37

38 14 **<Table 3: Dementia Friendly Prison Aims questionnaire table>**

39  
40 15 At both six-months and one-year follow-up, the majority of participants reported that  
41  
42 16 people with dementia in the prison did not face stigma and discrimination and were  
43  
44 17 supported to live independently at the prison. At 6-months, the latter was reported to have  
45  
46 18 improved – the only area in which participants reported positive change across the study. It  
47  
48 19 is possible that this reflects that prisons in general expect prisoners to function  
49  
50 20 independently within parameters, but in addition, Prison A had adopted a policy of  
51  
52 21 ‘enablement’, which appears to be compatible with this DFC aim:  
53  
54  
55  
56  
57  
58  
59  
60

**Table 3: Dementia Friendly Prison Aims and Changes made to Prison A**

| DEMENTIA FRIENDLY PRISON AIMS                                            | SIX-MONTH FOLLOW-UP<br>(n=15) |      |                           |      |           |      |           |      | ONE-YEAR FOLLOW-UP<br>(n=12) |      |                               |      |           |      |           |      |
|--------------------------------------------------------------------------|-------------------------------|------|---------------------------|------|-----------|------|-----------|------|------------------------------|------|-------------------------------|------|-----------|------|-----------|------|
|                                                                          | Aims met?                     |      | Change over last 6 months |      |           |      |           |      | Aims met?                    |      | Change over the last 6 months |      |           |      |           |      |
|                                                                          |                               |      | For better                |      | No change |      | For worse |      |                              |      | For better                    |      | No change |      | For worse |      |
|                                                                          | n                             | %    | n                         | %    | n         | %    | n         | %    | n                            | %    | n                             | %    | n         | %    | n         | %    |
| Views of people with dementia are listened to                            | 5                             | 33.3 | 4                         | 26.7 | 6         | 40   | 3         | 20   | 3                            | 25   | 3                             | 25   | 6         | 50   | 0         | 0    |
| Good understanding of dementia amongst prison staff                      | 2                             | 13.3 | 2                         | 13.3 | 10        | 66.7 | 2         | 13.3 | 2                            | 16.7 | 2                             | 16.7 | 4         | 33.3 | 2         | 16.7 |
| Good understanding of dementia amongst prisoners                         | 5                             | 33.3 | 5                         | 33.3 | 8         | 53.3 | 1         | 6.7  | 2                            | 16.7 | 3                             | 25   | 4         | 33.3 | 1         | 8.3  |
| Accessible and appropriate prison activities for people with dementia    | 4                             | 26.7 | 1                         | 6.7  | 11        | 73.3 | 2         | 13.3 | 3                            | 25   | 0                             | 0    | 7         | 58.3 | 1         | 8.3  |
| People with dementia are made to feel they can contribute to prison life | 4                             | 26.7 | 3                         | 20   | 8         | 53.3 | 3         | 20   | 3                            | 25   | 0                             | 0    | 7         | 58.3 | 1         | 8.3  |
| Staff pick up and act upon early signs of dementia                       | 2                             | 13.3 | 4                         | 26.7 | 8         | 53.3 | 1         | 6.7  | 2                            | 16.7 | 1                             | 8.3  | 6         | 50   | 1         | 8.3  |
| People with dementia can engage fully in prison life                     | 6                             | 40.0 | 4                         | 26.7 | 8         | 53.3 | 1         | 6.7  | 4                            | 33.3 | 1                             | 8.3  | 7         | 58.3 | 0         | 0    |
| People with dementia are supported to live as independently as possible  | 10                            | 66.7 | 6                         | 40   | 4         | 26.7 | 3         | 20   | 10                           | 83.3 | 3                             | 25   | 6         | 50   | 0         | 0    |
| The prison is easy to get around for people with dementia                | 4                             | 26.7 | 1                         | 6.7  | 8         | 53.3 | 3         | 20.0 | 4                            | 33.3 | 0                             | 0    | 7         | 58.3 | 1         | 8.3  |
| People with dementia are respected                                       | 4                             | 26.7 | 1                         | 6.7  | 9         | 60   | 4         | 26.7 | 5                            | 41.7 | 1                             | 8.3  | 6         | 50   | 1         | 8.3  |
| People with dementia face stigma and discrimination here                 | 4                             | 26.7 | 3                         | 20.0 | 8         | 53.3 | 2         | 13.3 | 4                            | 33.3 | 1                             | 8.3  | 6         | 50   | 1         | 8.3  |

1  
2  
3 1 *"I'm forever saying 'enable', enable as much as possible. Encourage them to*  
4  
5  
6 2 *clean, encourage them to tidy their cell up... get them doing as much as possible.*  
7  
8 3 *[Person with dementia], for all the will in the world you couldn't take work away*  
9  
10 4 *from him, he just wants to do it himself...we're never going to take that off him"*

11  
12  
13 5 *(Prisoner)*  
14  
15  
16  
17 6

18  
19  
20 7 Regarding the other DFC aims, only around a third or less of participants agreed that they  
21  
22 8 had been met. This included two foci of Prison A's DFC action plan: ease of navigation and  
23  
24 9 understanding and identifying symptoms of dementia, particularly amongst staff. Whilst on  
25  
26  
27 10 the one hand this may represent a lack of observable progress in these areas, it may also  
28  
29 11 reflect that the dementia-focused work at Prison A was largely implemented across two  
30  
31 12 older prisoner wings rather than prison-wide. This was indicated by staff participants who  
32  
33  
34 13 worked on mainstream wings reporting that they were unaware of the DFC project, and also  
35  
36  
37 14 by prisoner observation:  
38  
39  
40 15

41  
42  
43 16 *"I think those that work specifically on [older prisoner wings], I think they're*  
44  
45  
46 17 *becoming more aware. But as the others, they got a very mixed bag. A very*  
47  
48 18 *mixed bag" (Prisoner)*  
49  
50

51 19  
52  
53 20 **RESEARCH QUESTION 3: CONTEXTUAL FACTORS**  
54  
55

56  
57 21 An analysis of staff and prisoner interviews and focus group discussion identified elements  
58  
59 22 of the prison context which could act as barriers or facilitators to the implementation of DFC  
60

1 principles. These were related to: (i) institution and environment, (ii) staff, (iii) prisoners, (iv)  
2 prison culture and (v) external factors. These are depicted in Figure 3 with apposite  
3 quotations, and are discussed further below.

### <Figure 3: Barrier and Facilitators>

#### (i) *Institution and Environment*

8 Prison budget cuts and bureaucracy were reported to impact engagement with the  
9 intervention, and implementation. Staff reported that the larger number of older prisoners  
10 and relative stability of the prisoner population at prison A justified greater engagement  
11 with the project (although this fluctuated according to numbers of prisoners with a  
12 dementia diagnosis). At prison B, staff reported that the lower numbers of older prisoners  
13 and the amount of prisoner turnover could not justify continued engagement – mental  
14 health problems and substance misuse were clearer priorities. Staff leads at this prison also  
15 reported that they felt their support of people with dementia was good enough already.

17 Overall, staff and prisoner opinion of the dementia friendliness of both of the prisons was  
18 mixed. Specialist wings were largely considered more suitable for people with dementia  
19 than mainstream wings, as they were considered to be safer and less isolating, with more  
20 relaxed regimes and activities. Opportunities to socialise outside of the specialist wings at  
21 Prison A was considered positively, although some felt activities were too few at both  
22 prisons. Environmentally, the specialist wings were reportedly easier to navigate and more  
23 comfortable than mainstream wings. However, it was widely agreed that these fell short of  
24 dementia friendliness (for example, cell doors not wide enough for wheelchairs at prison A,



1 and lack of stair lifts at prison B), as did the prisons overall, which were reportedly difficult  
2 to get around. Relaxed regimes, activities and adaptations were all affected by budget cuts.

3

4 (ii) *Staff*

5 There were mixed reports from prisoners and staff on prison- and healthcare staff support  
6 for people with dementia in the prisons. Prison staff regularly working on specialist wings  
7 were described as more dementia aware and supportive of people with dementia, than staff  
8 working on mainstream wings. However, this more supportive practice seemed dependent  
9 on whether staff were able to choose this work. The introduction of social care at prison A  
10 and the presence of 24-hour healthcare staff at prison B were considered a potential benefit  
11 to people with dementia. There were mostly positive reports of most healthcare staff at  
12 both prisons, but there was some concern expressed about the more 'security' focused  
13 operation of the inpatient wing and staff at prison B. Some participants also suggested that  
14 healthcare staff seemed reluctant to make dementia diagnoses – with reports of prisoners  
15 with dementia symptoms outstripping numbers diagnosed, affecting treatment and also  
16 prison decisions to engage with dementia-related interventions.

17

18 (iii) *Prisoners*

19 Reports of the experiences of people with dementia at both prisons varied, but most  
20 participants suggested that it was likely to be confusing or frightening. Peer supporters  
21 providing direct care support for those with dementia were considered to provide vital  
22 support at Prison A – possibly as a result of less healthcare cover. The number of peer  
23 supporters at both prisons were seen as too few by most participants, with training, support  
24 and guidance around dementia mostly reported as inadequate, and a lack of formal

1  
2  
3 1 contracts making roles unclear at prison A. It is of note that healthcare staff were reported  
4  
5 2 to offer peer supporters good informal support on one of the specialist wings at prison B.  
6  
7  
8 3

9  
10 4 (iv) *Prison Culture*

11  
12  
13 5 There were a number of aspects of prison policy, practice and culture which appeared to be  
14  
15 6 compatible with DFC principles: *safety, security and decency* as guiding operating goals;  
16  
17 7 *equality* in the application of rules; *equivalence* of care between prisons and the community;  
18  
19 8 and at Prison A *enablement*. However, it seemed that some of these were applied patchily  
20  
21 9 or too rigidly at times to be supportive, such as an expectation that all prisoners conform to  
22  
23 10 rules *equally* irrespective of cognitive capacity, or a lack of *decency* in not offering through-  
24  
25 11 the-night incontinence care.  
26  
27  
28  
29  
30  
31  
32

33 13 Other aspects of prison culture were identified that could affect the support of people with  
34  
35 14 dementia, as well as the likelihood of prisoners seeking help. These included: how the  
36  
37 15 *punishment* of prison was perceived - prison as punishment or prison for punishment;  
38  
39 16 perceptions of prisoners as potentially *malingering* or *manipulative*; a somewhat '*macho*'  
40  
41 17 culture; *bullying and exploitation* (although only a couple of instances were reported); and  
42  
43 18 *stigma* about age – which seemed to have some effect on prisoners' choice of  
44  
45 19 accommodation and staff desire to work with this group. It is also of note that *power*  
46  
47 20 relationships suffuse prison culture. Some manifestations of this reported were: fear of  
48  
49 21 censure resulting in the reluctance of some peer supporters to advocate for people with  
50  
51 22 dementia in the prison, and for more junior prison staff to challenge practice.  
52  
53  
54  
55  
56  
57  
58

59 24 (v) *External Factors – family/friends and central government*  
60

1  
2  
3 1 There were a couple of examples of liaison between prison staff and family (mostly when  
4  
5 2 prisoners were dying or had died), family visits facilitated in quiet spaces, and the  
6  
7  
8 3 involvement of a charity that facilitated family connections at both prisons. However, there  
9  
10 4 appeared to be a lack of mechanisms/policy in place to maintain links between  
11  
12  
13 5 family/friends and people with dementia in both prisons, which included assistance with  
14  
15 6 telephone calls, and for family to report concerns or receive support, and some reports of  
16  
17 7 other prisoners risking punishment to assist.  
18  
19  
20 8

21  
22  
23 9 Central governments' austerity-driven cuts were reported to impact the whole prison  
24  
25 10 system in myriad ways. The lack of policy and strategy attention for people living with  
26  
27 11 dementia appeared to amplify the effect. Given both prisons reportedly struggled with  
28  
29 12 implementing mandatory operations and training, attending to issues that are not  
30  
31 13 mandatory seemed to render the status of additional dementia input as a "luxury" (Staff).  
32  
33  
34  
35  
36  
37  
38  
39

## 40 15 **DISCUSSION**

### 41 16 ***Summary of results***

42  
43 17 Both of the participating prisons reported that DFC principles were applicable to them, but  
44  
45 18 differed in the extent to which they engaged with the intervention. Dementia information  
46  
47 19 sessions were delivered at both, and reportedly increased participants' knowledge,  
48  
49 20 confidence, and understanding of dementia, consistent with community DFC  
50  
51 21 evaluations.[24-30] Prison A created and implemented a DFC action plan, facilitated  
52  
53 22 additional awareness raising initiatives, small environmental changes, and reportedly helped  
54  
55 23 people with dementia to live more independently – but, progress was considered slow and  
56  
57 24 was mostly focused on older prisoner wings. Prison B did not create nor implement a DFC  
58  
59  
60

1  
2  
3 1 action plan. Facilitators and barriers for the implementation of DFC principles largely flowed  
4  
5 2 from where individuals living with dementia chose to reside, with older prisoner-focused  
6  
7  
8 3 wings considered more dementia friendly, with more 'aware' staff and peer supporters.  
9  
10 4 Austerity-related cuts to prison budgets presented one of the biggest barriers to  
11  
12  
13 5 implementation and to decisions to engage in the intervention – which was also driven by  
14  
15 6 numbers of older prisoners and people with dementia diagnoses.  
16  
17  
18 7

### 8 ***Study strengths and limitations***

9 Study strengths and limitations divide into those related to the fidelity of the intervention at  
10  
11  
12  
13  
14  
15  
16  
17  
18  
19  
20  
21  
22  
23  
24  
25  
26  
27  
28  
29  
30  
31  
32  
33  
34  
35  
36  
37  
38  
39  
40  
41  
42  
43  
44  
45  
46  
47  
48  
49  
50  
51  
52  
53  
54  
55  
56  
57  
58  
59  
60

### 12 ***Intervention***

13 Although most AS intervention criteria were met, one of the key DFC principles proved  
14  
15  
16  
17  
18  
19  
20  
21  
22  
23  
24  
25  
26  
27  
28  
29  
30  
31  
32  
33  
34  
35  
36  
37  
38  
39  
40  
41  
42  
43  
44  
45  
46  
47  
48  
49  
50  
51  
52  
53  
54  
55  
56  
57  
58  
59  
60

### 23 ***Evaluation***

1 This is the first published evaluation of the Government-endorsed DFC approach to prisons,  
2 and – as a small-scale study – was essentially exploratory, taking place in only two prisons,  
3 and with no control groups. The PPI phase of the study proved valuable in targeting the  
4 work and ensuring materials were workable, although an expanded role for prisoner  
5 involvement in design, recruitment and execution would have been desirable. The sample  
6 size for the information session evaluation was relatively small, and significantly reduced  
7 across the follow-up period affecting sub-group analyses, as did the lack of socio-  
8 demographic data. A ‘traditional’ one-year follow-up study of a prison-based intervention  
9 may be impossible on a small-scale due to high prisoner and staff turnover – larger sample  
10 sizes, or briefer follow-up periods may be more feasible.

### 12 ***Implications and recommendations***

13 The biggest challenge to the implementation of DFC principles in both prisons seemed to  
14 come from the significantly reduced budgets allocated since 2010, resulting in a quarter of  
15 the prison workforce being cut,[45-46] and contributing to record levels of prisoner violence  
16 and self-harm.[47-50] As older prisoners typically pose less problems and reoffend less than  
17 their younger counterparts,[51-54] their difficulties are in danger of going unrecognised,  
18 underscored by the Government’s repeated refusal to create a strategy focused on  
19 them.[16, 55-60] Centralised resources and strategy are fundamental in the early release of  
20 people living with dementia in prison, which is currently rarely used, in guiding and funding  
21 better health and social care, and more appropriate social and physical environments.  
22 However, from the evaluation there were a number of more locally-controlled practices  
23 identified that could facilitate DFC practice, some of which could be co-designed and  
24 delivered with external organisations:

- 1  
2  
3 1 • Partial segregation of older prisoners on wings that are ‘opt-in’ for both prisoners  
4  
5  
6 2 and staff, with trained and supported staff and peer supporters,[59] a  
7  
8 3 comprehensive programme of activities, and opportunities for prisoners to leave  
9  
10 4 the wing to access prison-wide activities and services if desired.[61-62]  
11  
12  
13 5 • Dementia information sessions made available to the wider prison, to include a  
14  
15 6 reflection of the impact of prison and its culture on people with dementia, and  
16  
17 7 examples of good prison dementia practice from specialist wings or health/social  
18  
19 8 care.  
20  
21  
22  
23 9 • Policies for older prisoners and those with dementia which allow them to be  
24  
25 10 unlocked, to receive retirement pay commensurate with working peers’ pay, and to  
26  
27 11 access appropriate activities – potentially at an off-wing centre.  
28  
29  
30 12 • Use of in-house expertise, labour, and adaption of simple DFC design to improve  
31  
32 13 environments.[63-65]  
33  
34  
35 14 • Access to specialist dementia training for healthcare staff where needed, and a clear  
36  
37 15 referral pathway to specialist dementia services in the community. Dementia  
38  
39 16 awareness could be included as part of broader health promotion activities.  
40  
41  
42 17 • Review and translate local policies, practices and procedures for older prisoners and  
43  
44 18 people with dementia, including disciplinary and restraint procedures. Resultant  
45  
46 19 training can address more problematic aspects of prison culture, including stigma,  
47  
48 20 bullying, and malingering assumptions – linked as they are to prison suicide.[66]  
49  
50  
51  
52 21 • To systematically support the links between people living with dementia in prison  
53  
54 22 and their family to be more in line with NICE guidelines[67]. For example, to assist  
55  
56 23 telephone calls, facilitate travel to visits in quiet spaces, increase liaison between  
57  
58  
59  
60

1 family/friends and the prison, and support family and friends in coping with the  
2  
3  
4  
5  
6  
7  
8  
9  
10  
11  
12  
13  
14  
15  
16  
17  
18  
19  
20  
21  
22  
23  
24  
25  
26  
27  
28  
29  
30  
31  
32  
33  
34  
35  
36  
37  
38  
39  
40  
41  
42  
43  
44  
45  
46  
47  
48  
49  
50  
51  
52  
53  
54  
55  
56  
57  
58  
59  
60

1 family/friends and the prison, and support family and friends in coping with the  
2 distress of having a loved one in prison with dementia.  
3  
4  
5  
6  
7  
8  
9  
10  
11  
12  
13  
14  
15  
16  
17  
18  
19  
20  
21  
22  
23  
24  
25  
26  
27  
28  
29  
30  
31  
32  
33  
34  
35  
36  
37  
38  
39  
40  
41  
42  
43  
44  
45  
46  
47  
48  
49  
50  
51  
52  
53  
54  
55  
56  
57  
58  
59  
60

#### 4 ***Future research***

5 This was a pilot study that produced some promising findings warranting further  
6 investigation, such as a more robust evaluation with a larger sample size, across a variety of  
7 prisons, for longer periods. Exploring the intersectionality of other protected characteristics  
8 (for example gender and ethnicity) with age and dementia, will be particularly important to  
9 ensure the community is applicable to all.  
10

11 The role of prisoner peer supporters for people with dementia in prison appeared to be key  
12 in this study, and as to date there have been no published evaluations of their work,  
13 additional study would be valuable.[68] There is a particular lack of research focused on  
14 people living with dementia in prisons and upon the challenges of resettlement[69], so  
15 further research on their experiences and the most effective ways to support them, would  
16 likely be useful to prison practitioners, researchers and policy makers.  
17  
18  
19  
20  
21  
22  
23  
24

## 18 **CONCLUSION**

19 In the two prisons involved in this pilot study and process evaluation, DFC principles were  
20 considered applicable, and information sessions reportedly positive, but only one prison  
21 continued to work with the Alzheimer's Society in creating and implementing DFC plans. A  
22 number of contextual factors appeared to impact both engagement with the study and also  
23 in dementia friendly practice in prisons in general. However, perhaps the most fundamental  
24 was the balancing of resources - having to make difficult decisions about whether the

1 numbers of both older prisoners, and prisoners with dementia, were sufficiently high to  
2 justify engagement with non-compulsory dementia-focused interventions in a context of  
3 Government-sanctioned austerity and budget cuts. Without policy at Government-level to  
4 focus attention on one of the most vulnerable groups living in prison, it may only be prisons  
5 with very large numbers of older prisoners that can justify interventions targeting prisoners  
6 with dementia, which raises moral, legal and ethical concerns for those who do not.

## 8 FOOTNOTES

9 <sup>1</sup> *The age cut-off for 'older prisoner' varies, but is typically thought to be 10 years younger*  
10 *than the general population, as prisoners have been reported to age more rapidly due to*  
11 *lifestyle, healthcare access, substance misuse, and the stress of imprisonment (see [70] for*  
12 *further discussion)*

13 <sup>2</sup> *"Patient and Public Involvement has been described as "research being carried out 'with' or*  
14 *'by' members of the public rather than 'to', 'about' or 'for' them" [71]. So, prisoner*  
15 *involvement in the research process itself, as distinct from being a 'participant' in research*  
16 *interventions or evaluations.*

17 <sup>3</sup> *Local prisons serve the courts local to the prison, holding prisoners on remand, those*  
18 *-serving shorter sentences and those serving longer sentences awaiting allocation to another*  
19 *prison.*

20 <sup>4</sup> *Organisations join local Dementia Action Alliances to "share best practice and take action*  
21 *on dementia" [72]*

22 <sup>5</sup> *anonymised to preserve confidentiality*



## 1     **AUTHOR CONTRIBUTIONS**

2     **Samantha Treacy** – design of study materials; facilitated focus groups and conducted  
3     interviews; led qualitative analysis, and conducted quantitative analyses; drafted the  
4     manuscript as lead author.

5     **Anna Haggith** – involvement with project conception and design; liaison with project  
6     partners; co-designed study materials; facilitated PPI/E, awareness sessions, interviews and  
7     focus groups; conducted qualitative analysis; contributed comments to manuscript drafts.

8     **Nuwan Darshana Wickramasinghe** – conducted quantitative analysis and qualitative  
9     analyses; edits to manuscript drafts.

10    **Tine Van Bortel** – Principle Investigator: conceived of and designed the study and grant  
11    proposal; oversaw and advised on all aspects of the study; design of study materials; liaison  
12    with project partners; contributed comments and edits to manuscript drafts.

## 14    **ACKNOWLEDGEMENTS**

15    We would like to thank the prisoners and staff of both prisons who participated in the study,  
16    the prisoners who helped us with project design and materials, the Governors of both  
17    prisons for their permission to conduct the study, and Her Majesty's Prison and Probation  
18    Service, particularly Rupert Bailie, for permission and support. We would also like to thank  
19    the Alzheimer's Society, particularly the representatives working with the prisons, and Laura  
20    Meadowcraft, Caroline Lee and Natalie Mann for contributing towards the  
21    conceptualisation of the initial proposal and its facilitation. We would also like to thank the  
22    reviewers for their time and suggestions.

1  
2  
3 1  
4  
56 2 **FUNDING**  
7  
8  
910 3 This work was funded by the Department of Health and Social Care's National Institute for  
11  
12 4 Health Research, Collaboration for Leadership for Applied Health Research and Care, East of  
13  
14  
15 5 England.  
16  
1718 6  
19  
2021 7 **DISCLAIMER**  
22  
2324 8 The views expressed are those of the authors and not necessarily those of the NHS, the  
25  
26  
27 9 NIHR or the Department of Health and Social Care, nor of Her Majesty's Prison and  
28  
29  
30 10 Probation Service.  
31  
3233 11  
34  
3536 12 **COMPETING INTERESTS**  
37  
3839 13 None declared.  
40  
41  
4243 14  
44  
4546 15 **PATIENT CONSENT**  
47  
4849 16 Not required.  
50  
51  
5253 17  
54  
5556 18 **ETHICS APPROVAL**  
57  
58  
59  
60

1  
2  
3 1 Advice was sought from the Anglia Ruskin University ethics committee, and full ethical  
4  
5  
6 2 approval for the study was granted by the National Offender Management Service (NOMS) –  
7  
8 3 National Research Committee, with further permission obtained from the Governors of each  
9  
10 4 participating prison.  
11  
12  
13  
14 5  
15  
16

## 17 6 **PROVENANCE AND PEER REVIEW**

18  
19  
20 7 Not commissioned, externally peer reviewed.  
21  
22  
23  
24 8  
25  
26

## 27 9 **DATA SHARING STATEMENT**

28  
29  
30 10 Deidentified participant data are available from Orcid ID 0000-0003-0467-6393 upon  
31  
32 11 request  
33  
34  
35  
36 12  
37

## 38 13 **REFERENCES**

- 39  
40 14 1 Ministry of Justice. Prison population: 31 March 2018. London: Ministry of Justice, 2018.  
41  
42 15 [https://www.gov.uk/government/statistics/offender-management-statistics-quarterly-](https://www.gov.uk/government/statistics/offender-management-statistics-quarterly-october-to-december-2017)  
43  
44 16 [october-to-december-2017](https://www.gov.uk/government/statistics/offender-management-statistics-quarterly-october-to-december-2017) (accessed 06 December 2018).  
45  
46  
47  
48 17  
49  
50 18 2 Allen G, Watson C. UK prison population statistics. House of Commons Library briefing  
51  
52 19 paper. London: House of Commons Library, 2017.  
53  
54  
55 20  
56  
57 21 3 Ministry of Justice. Prison population projections 2017 to 2022, England and Wales.  
58  
59 22 London: Ministry of Justice, 2017.  
60

- 1  
2  
3 1 [https://www.gov.uk/government/uploads/system/uploads/attachment\\_data/file/639801/p](https://www.gov.uk/government/uploads/system/uploads/attachment_data/file/639801/p)  
4  
5 2 [rison-population-projections-2017-2022.pdf](#) (accessed 06 December 2018).  
6  
7  
8 3  
9  
10 4 Di Lorito C, Völlm B, Dening T. Psychiatric disorders among older prisoners: a systematic  
11  
12 review and comparison study against older people in the community. *Aging Ment Health*  
13 5  
14 2018;22(1):1-10 doi:10.1080/13607863.2017.1286453 [published Online First 12 March  
15 6  
16 2017].  
17 7  
18  
19 8  
20  
21 9 5 Moll A. Losing track of time: Dementia and the ageing prison population. London: Mental  
22  
23 Health Foundation, 2013. <https://www.mentalhealth.org.uk/sites/default/files/losing-track->  
24 10  
25 [of-time-2013.pdf](#) (accessed 06 December 2018).  
26 11  
27  
28  
29 12  
30  
31 13 6 Senior P, Forsyth K, Walsh E, et al. Health and social care services for older male adults in  
32  
33 prison: the identification of current service provision and piloting of an assessment and care  
34 14  
35 planning model. Health Services and Delivery Research. Southampton: National Institute for  
36 15  
37 Health Research, 2013.  
38 16  
39  
40 17 [https://www.ncbi.nlm.nih.gov/books/NBK259270/pdf/Bookshelf\\_NBK259270.pdf](https://www.ncbi.nlm.nih.gov/books/NBK259270/pdf/Bookshelf_NBK259270.pdf) (accessed  
41 18  
42 06 December 2018).  
43 19  
44  
45  
46 20 7 Hayes AJ, Burns A, Turnbull P, et al. Social and custodial needs of older adults in prisons.  
47  
48 *Age Ageing* 2013;42(5):589-93. doi:10.1093/ageing/aft066 [published Online First: 21 June  
49 21  
50 2013].  
51 22  
52  
53  
54 23  
55  
56  
57  
58  
59  
60

- 1  
2  
3 1 8 Hayes A, Burns A, Turnbull P, et al. The health and social needs of older male prisoners. *Int*  
4  
5  
6 2 *J Geriatr Psychiatry* 2012;27(11):1155-62 doi:10.1002/gps.3761 [published Online First: 05  
7  
8 3 March 2012].  
9  
10  
11 4  
12  
13 5 9 Combalbert N, Pennequin V, Ferrand C, et al. Cognitive impairment, self-perceived health  
14  
15 6 and quality of life of older prisoners. *Crim Behav Ment Health* 2018;28(1):36-49  
16  
17 doi:10.1002/cbm.2023 [published Online First: 10 March 2017].  
18  
19  
20 8  
21  
22  
23 9 10 Cipriani G, Carlesi C, Danti S, et al. Old and dangerous: Prison and dementia. *J Forensic*  
24  
25 10 *Leg Med* 2017;51:40-44 doi:10.1016/j.jflm.2017.07.004 [published Online First: 28 July  
26  
27 11 2017].  
28  
29  
30  
31 12  
32  
33 13 11 Lee C, Haggith A, Mann N, et al. Older prisoners and the Care Act 2014: An examination  
34  
35 14 of policy, practice and models of social care delivery. *Prison Serv J* 2016;224:35-41.  
36  
37  
38 15  
39  
40  
41 16 12 Maschi T, Kwak J, Ko E, et al. Forget me not: dementia in prison. *Gerontologist*  
42  
43 17 2012;52(4):441-451 doi:10.1093/geront/gnr131 [published Online First: 11 January 2012].  
44  
45  
46 18  
47  
48 19 13 Gaston S. Vulnerable prisoners: Dementia and the impact on prisoners, staff and the  
49  
50 20 correctional setting. *Collegian* 2018;25:241-46 doi:10.1016/j.colegn.2017.05.004 [published  
51  
52 21 Online First: 02 June 2017].  
53  
54  
55 22  
56  
57  
58  
59  
60

- 1  
2  
3 1 14 du Toit, SHJ, McGrath M. Dementia in prisons – enabling better care practices for those  
4  
5 ageing in correctional facilities. *Br J Occup Ther* Published Online First: 19 December 2017.  
6  
7  
8 3 doi:10.1177/0308022617744509  
9  
10  
11 4  
12  
13 5 15 Feczko A. Dementia in the incarcerated elderly adult: innovative solutions to promote  
14  
15 quality care. *J Am Assoc Nurse Pract* 2014;26(12):640-8 doi:10.1002/2327-6924.12189  
16  
17 [published Online First: 12 November 2018].  
18  
19  
20 8  
21  
22  
23 9 16 Justice Committee. Older prisoners: Fifth report of session 2013-14. London: House of  
24  
25 Commons, 2013. <https://www.parliament.uk/documents/commons->  
26  
27 [committees/justice/older-prisoners.pdf](https://www.parliament.uk/documents/commons-) (accessed 06 December 2018).  
28  
29  
30 12  
31  
32  
33 13 17 Christodoulou M. Locked up and at risk of dementia. *Lancet Neurol* 2012;11(9):750-1  
34  
35 14 doi:10.1016/S1474-4422(12)70195-3 [published Online First: 18 August 2012].  
36  
37  
38 15  
39  
40 16 18 Department of Health. The future organisation of prison health care. London:  
41  
42 Department of Health, 1999.  
43  
44  
45 18 [http://webarchive.nationalarchives.gov.uk/20110504020423/http://www.dh.gov.uk/prod\\_c](http://webarchive.nationalarchives.gov.uk/20110504020423/http://www.dh.gov.uk/prod_c)  
46  
47 [onsum\\_dh/groups/dh\\_digitalassets/@dh/@en/documents/digitalasset/dh\\_4106031.pdf](http://webarchive.nationalarchives.gov.uk/20110504020423/http://www.dh.gov.uk/prod_c)  
48  
49 (accessed 06 December 2018).  
50  
51  
52 21  
53  
54  
55 22 19 Care Act. UK: The Stationary Office, 2014.  
56  
57 23 <http://www.legislation.gov.uk/ukpga/2014/23/contents/enacted> (accessed 06 December  
58  
59 24 2018).  
60

1

2 20 Health and Social Care Committee. Prison health. London: House of Commons, 2018.

3 <https://publications.parliament.uk/pa/cm201719/cmselect/cmhealth/963/963.pdf>

4 (accessed on 06 December 2018).

5

6 21 Department of Health. Prime Minister's challenge on dementia 2020. London:

7 Department of Health, 2015.

8 [https://www.gov.uk/government/uploads/system/uploads/attachment\\_data/file/414344/p](https://www.gov.uk/government/uploads/system/uploads/attachment_data/file/414344/p)

9 [m-dementia2020.pdf](https://www.gov.uk/government/uploads/system/uploads/attachment_data/file/414344/p-m-dementia2020.pdf) (accessed 06 December 2018).

10

11 22 Department of Health. Prime Minister's challenge on dementia: Delivering major

12 improvements in dementia care and research by 2015. London: Department of Health,

13 2012.

14 [https://www.gov.uk/government/uploads/system/uploads/attachment\\_data/file/215101/d](https://www.gov.uk/government/uploads/system/uploads/attachment_data/file/215101/d)

15 [h\\_133176.pdf](https://www.gov.uk/government/uploads/system/uploads/attachment_data/file/215101/d-h_133176.pdf) (accessed 06 December 2018).

16

17 23 Alzheimer's Society. Guidance for communities registering for the recognition process for

18 dementia friendly communities. London: Alzheimer's Society, 2013.

19 <https://www.alzheimers.org.uk/sites/default/files/2018->

20 [06/DFC%20Recognition%20process%20-](https://www.alzheimers.org.uk/sites/default/files/2018-06/DFC%20Recognition%20process%20-)

21 [%20Guidance%20for%20communities\\_FS%20albert\\_4.pdf](https://www.alzheimers.org.uk/sites/default/files/2018-06/DFC%20Recognition%20process%20-%20Guidance%20for%20communities_FS%20albert_4.pdf) (accessed 06 December 2018).

22

23 24 Dean J, Silverside K, Crampton J, et al. Evaluation of the Bradford Dementia Friendly

24 Communities Programme. York: Joseph Rowntree Foundation, 2015.

- 1  
2  
3 1 [https://www.jrf.org.uk/report/evaluation-bradford-dementia-friendly-communities-](https://www.jrf.org.uk/report/evaluation-bradford-dementia-friendly-communities-programme)  
4  
5  
6 2 [programme](https://www.jrf.org.uk/report/evaluation-bradford-dementia-friendly-communities-programme) (accessed 06 December 2018).  
7  
8 3  
9  
10 4 25 Dean J, Silverside K, Crampton J, et al. Evaluation of the York Dementia Friendly  
11  
12  
13 5 Communities Programme. York: Joseph Rowntree Foundation, 2015.  
14  
15 6 <https://www.jrf.org.uk/report/evaluation-york-dementia-friendly-communities-programme>  
16  
17  
18 7 (accessed 06 December 2018).  
19  
20 8  
21  
22 9 26 Henderson J. Dementia friendly communities: Edinburgh City initiatives 2014-2015.  
23  
24  
25 10 Edinburgh: Faith in Older People, 2015.  
26  
27 11 [http://evaluationsupportscotland.org.uk/media/uploads/resources/dementia\\_friendly\\_edin-](http://evaluationsupportscotland.org.uk/media/uploads/resources/dementia_friendly_edinburgh_final.pdf)  
28  
29  
30 12 [burgh\\_final.pdf](http://evaluationsupportscotland.org.uk/media/uploads/resources/dementia_friendly_edinburgh_final.pdf) (accessed 06 December 2018).  
31  
32  
33 13  
34  
35 14 27 Seydak E, Holmes M, Lynch S, et al. Building a Dementia Friendly Community in Northern  
36  
37  
38 15 Ireland: Learning from the DEED Project in Derry. York: Joseph Rowntree Foundation, 2015.  
39  
40 16 [https://www.jrf.org.uk/report/building-dementia-friendly-community-northern-ireland-](https://www.jrf.org.uk/report/building-dementia-friendly-community-northern-ireland-learning-deed-project-derry)  
41  
42  
43 17 [learning-deed-project-derry](https://www.jrf.org.uk/report/building-dementia-friendly-community-northern-ireland-learning-deed-project-derry) (accessed 06 December 2018).  
44  
45 18  
46  
47 19 28 Oxford Brookes University. Evaluation of Hampshire Dementia Friendly Communities:  
48  
49  
50 20 Final Report. Oxford: Oxford Brookes University, 2015.  
51  
52 21 [https://ipc.brookes.ac.uk/publications/publication\\_814.html](https://ipc.brookes.ac.uk/publications/publication_814.html) (accessed 06 December 2018).  
53  
54 22  
55  
56 23 29 Oxford Brookes University. Oxford Dementia Challenge Group: Evaluation of Dementia  
57  
58  
59 24 Friendly Communities Project. Oxford: Oxford Brookes University, 2014.  
60



- 1  
2  
3 1 [https://ipc.brookes.ac.uk/publications/Oxfordshire\\_Dementia\\_Friendly\\_Communities\\_evaluation\\_-\\_August\\_2014.pdf](https://ipc.brookes.ac.uk/publications/Oxfordshire_Dementia_Friendly_Communities_evaluation_-_August_2014.pdf) (accessed 06 December 2018).  
4  
5  
6 2  
7  
8 3  
9  
10 4 30 Innes A, Cutler C, Heward M, et al. Dorset Dementia Friendly Communities Project: Final  
11  
12  
13 5 Evaluation Report (June 2014). Bournemouth: Bournemouth University, 2014.  
14  
15 6  
16  
17 7 31 Stevens B, Shaw R, Bewert P, Salt M, Alexander R, Gee BL. Systematic review of aged care  
18  
19  
20 8 interventions for older prisoners. *Australas J Ageing* 2017;37(1):34-42  
21  
22  
23 9 doi:10.1111/ajag.12484 [published Online First 06 December 2017].  
24  
25 10  
26  
27 11 32 Lee C, Treacy S, Haggith A, Wickramasinghe ND, Cater F, Kuhn I, Van Bortel T. A  
28  
29  
30 12 systematic integrative review of programmes addressing the social care needs of older  
31  
32  
33 13 prisoners. *Health & Justice* 2019;7(1):9 doi:10.1186/s40352-019-0090-0 [published Online  
34  
35 14 First 27 May 2019].  
36  
37 15  
38  
39 16 33 Baldwin J, Leete J. Behind bars: the challenge of an ageing prison population. *Australian*  
40  
41  
42 17 *Journal of Dementia Care* 2012;1(2):16-19.  
43  
44 18  
45  
46 19 34 Human Rights Watch. Old behind bars: The aging prison population in the United States.  
47  
48  
49 20 New York: Human Rights Watch, 2012. [https://www.hrw.org/report/2012/01/27/old-](https://www.hrw.org/report/2012/01/27/old-behind-bars/aging-prison-population-united-states)  
50  
51  
52 21 [behind-bars/aging-prison-population-united-states](https://www.hrw.org/report/2012/01/27/old-behind-bars/aging-prison-population-united-states) (accessed 06 December 2018).  
53  
54 22  
55  
56 23 35 Fazel S, McMillan J, O'Donnell I. Dementia in prison: ethical and legal implications. *J Med*  
57  
58  
59 24 *Ethics* 2002;28(3):156-159 doi:10.1136/jme.28.3.156  
60

1  
2  
3  
4  
5  
6  
7  
8  
9  
10  
11  
12  
13  
14  
15  
16  
17  
18  
19  
20  
21  
22  
23  
24  
25  
26  
27  
28  
29  
30  
31  
32  
33  
34  
35  
36  
37  
38  
39  
40  
41  
42  
43  
44  
45  
46  
47  
48  
49  
50  
51  
52  
53  
54  
55  
56  
57  
58  
59  
60

1  
2  
3  
4  
5  
6  
7  
8  
9  
10  
11  
12  
13  
14  
15  
16  
17  
18  
19  
20  
21  
22  
23  
24  
25  
26  
27  
28  
29  
30  
31  
32  
33  
34  
35  
36  
37  
38  
39  
40  
41  
42  
43  
44  
45  
46  
47  
48  
49  
50  
51  
52  
53  
54  
55  
56  
57  
58  
59  
60

36 Her Majesty's Inspectorate of Prisons. HMP [Prison A<sup>5</sup>]. London: Her Majesty's  
Inspectorate of Prisons.

37 Her Majesty's Inspectorate of Prisons. HMP [Prison B<sup>5</sup>]. London: Her Majesty's  
Inspectorate of Prisons.

38 Alzheimer's Society. Foundation criteria for the dementia-friendly communities  
recognition process. London: Alzheimer's Society, 2014.  
[https://www.alzheimers.org.uk/sites/default/files/2018-  
06/DFC%20Foundation%20criteria\\_Fs%20Albert\\_4.pdf](https://www.alzheimers.org.uk/sites/default/files/2018-06/DFC%20Foundation%20criteria_Fs%20Albert_4.pdf) (accessed 06 December 2018).

39 University of Salford. Dementia Friendly Physical Environments Checklist. Salford,  
University of Salford. 2013.  
[http://www.dementiaaction.org.uk/assets/0000/4336/dementia\\_friendly\\_environments\\_ch  
ecklist.pdf](http://www.dementiaaction.org.uk/assets/0000/4336/dementia_friendly_environments_checklist.pdf) (accessed 06 December 2018).

40 IBM Corp. IBM SPSS Statistics for Windows. Version 23.0, 2015. Armonk, NY: IBM Corp.

41 Gale NK, Heath G, Cameron E, et al. Using the framework method for the analysis of  
qualitative data in multi-disciplinary health research. *BMC Med Res Methodol*  
2013;13(1):117 doi:10.1186/1471-2288-13-117

1  
2  
3 1 42 QSR International Pty Ltd. NVivo qualitative data analysis software. Version 11, 2011.  
4  
5  
6 2 Melbourne: QSR International Pty Ltd.  
7

8 3  
9  
10 4 43 Microsoft Corporation. Microsoft Word. Version 16.0.4390.1000, 2016. Washington:  
11  
12  
13 5 Microsoft Corporation.  
14

15 6  
16  
17 7 44 Microsoft Corporation. Microsoft Excel. Version 16.0.4390.1000, 2016. Washington:  
18  
19  
20 8 Microsoft Corporation.  
21

22 9  
23  
24  
25 10 45 Ministry of Justice. Her Majesty's Prison and Probation Service (HMPPS) workforce  
26  
27  
28 11 quarterly: June 2017. London: Ministry of Justice, 2017.  
29  
30 12 [https://www.gov.uk/government/statistics/her-majestys-prison-and-probation-service-](https://www.gov.uk/government/statistics/her-majestys-prison-and-probation-service-workforce-quarterly-june-2017)  
31  
32 13 [workforce-quarterly-june-2017](https://www.gov.uk/government/statistics/her-majestys-prison-and-probation-service-workforce-quarterly-june-2017) (accessed 06 December 2018).  
33

34  
35 14  
36  
37 15 46 Prison Reform Trust. Prison: The facts. Bromley briefings, Summer 2018. London: Prison  
38  
39  
40 16 Reform Trust, 2018.  
41  
42 17 [http://www.prisonreformtrust.org.uk/Portals/0/Documents/Bromley%20Briefings/Summer](http://www.prisonreformtrust.org.uk/Portals/0/Documents/Bromley%20Briefings/Summer%202018%20factfile.pdf)  
43  
44 18 [%202018%20factfile.pdf](http://www.prisonreformtrust.org.uk/Portals/0/Documents/Bromley%20Briefings/Summer%202018%20factfile.pdf) (accessed 06 December 2018).  
45  
46

47 19  
48  
49 20 47 Ministry of Justice. Safety in custody quarterly bulletin: December 2017. London:  
50  
51  
52 21 Ministry of Justice, 2018. [https://www.gov.uk/government/statistics/safety-in-custody-](https://www.gov.uk/government/statistics/safety-in-custody-quarterly-update-to-december-2017)  
53  
54 22 [quarterly-update-to-december-2017](https://www.gov.uk/government/statistics/safety-in-custody-quarterly-update-to-december-2017) (accessed 06 December 2018).  
55  
56

57 23  
58  
59  
60

- 1  
2  
3 1 48 Ministry of Justice. Prison safety and reform. London: Ministry of Justice, 2016.  
4  
5  
6 2 [https://www.gov.uk/government/uploads/system/uploads/attachment\\_data/file/565014/c](https://www.gov.uk/government/uploads/system/uploads/attachment_data/file/565014/cm-9350-prison-safety-and-reform-web.pdf)  
7  
8 3 [m-9350-prison-safety-and-reform- web .pdf](https://www.gov.uk/government/uploads/system/uploads/attachment_data/file/565014/cm-9350-prison-safety-and-reform-web.pdf) (accessed 06 December 2018).  
9  
10 4  
11  
12  
13 5 49 Beard J, Allen G. Prison safety in England and Wales. House of Commons Library briefing  
14  
15 6 paper. London: House of Commons Library, 2017.  
16  
17 7 <https://researchbriefings.parliament.uk/ResearchBriefing/Summary/CBP-7467> (accessed 06  
18  
19 8 December 2018).  
20  
21  
22 9  
23  
24  
25 10 50 Her Majesty's Inspectorate of Prisons. Annual report 2016-17. London: Her Majesty's  
26  
27 11 Inspectorate of Prisons, 2017. [http://www.justiceinspectorates.gov.uk/hmiprisons/wp-](http://www.justiceinspectorates.gov.uk/hmiprisons/wp-content/uploads/sites/4/2017/07/HMIP-AR_2016-17_CONTENT_11-07-17-WEB.pdf)  
28  
29 12 [content/uploads/sites/4/2017/07/HMIP-AR\\_2016-17\\_CONTENT\\_11-07-17-WEB.pdf](http://www.justiceinspectorates.gov.uk/hmiprisons/wp-content/uploads/sites/4/2017/07/HMIP-AR_2016-17_CONTENT_11-07-17-WEB.pdf)  
30  
31 13 (accessed 06 December 2018).  
32  
33  
34 14  
35  
36  
37 15 51 Her Majesty's Inspectorate of Prisons. 'No problems – old and quiet': Older prisoners in  
38  
39 16 England and Wales. London: Her Majesty's Inspectorate of Prisons, 2004.  
40  
41 17 [https://www.justiceinspectorates.gov.uk/hmiprisons/wp-](https://www.justiceinspectorates.gov.uk/hmiprisons/wp-content/uploads/sites/4/2014/08/OlderPrisoners-2004.pdf)  
42  
43 18 [content/uploads/sites/4/2014/08/OlderPrisoners-2004.pdf](https://www.justiceinspectorates.gov.uk/hmiprisons/wp-content/uploads/sites/4/2014/08/OlderPrisoners-2004.pdf) (accessed 06 December 2018).  
44  
45  
46  
47 19  
48  
49  
50 20 52 Brunton-Smith I, Hopkins K. The factors associated with proven re-offending following  
51  
52 21 release from prison: findings from waves 1 to 3 of SPCR – Results from the Surveying  
53  
54 22 Prisoner Crime Reduction (SPCR) longitudinal cohort study of prisoners. Ministry of Justice  
55  
56 23 Analytical Series. London: Ministry of Justice, 2013.  
57  
58  
59  
60

1 [https://www.gov.uk/government/uploads/system/uploads/attachment\\_data/file/491119/r](https://www.gov.uk/government/uploads/system/uploads/attachment_data/file/491119/re-offending-release-waves-1-3-spcr-findings.pdf)  
2 [e-offending-release-waves-1-3-spcr-findings.pdf](https://www.gov.uk/government/uploads/system/uploads/attachment_data/file/491119/re-offending-release-waves-1-3-spcr-findings.pdf) (accessed 06 December 2018).

3  
4  
5  
6  
7  
8  
9  
10  
11 53 Omolade S. The needs and characteristics of older prisoners: Results from the Surveying  
12 Prisoner Crime Reduction (SPCR) survey. Ministry of Justice analytical summary. London:  
13 Ministry of Justice, 2014.

14  
15  
16  
17  
18 [https://www.gov.uk/government/uploads/system/uploads/attachment\\_data/file/368177/n](https://www.gov.uk/government/uploads/system/uploads/attachment_data/file/368177/needs-older-prisoners-spcr-survey.pdf)  
19 [eeds-older-prisoners-spcr-survey.pdf](https://www.gov.uk/government/uploads/system/uploads/attachment_data/file/368177/needs-older-prisoners-spcr-survey.pdf) (accessed 06 December 2018).

20  
21  
22  
23  
24  
25 54 Ministry of Justice. Proven reoffending tables (3 monthly), April 2016 to June 2016.  
26 London: Ministry of Justice, 2018. [https://www.gov.uk/government/statistics/proven-](https://www.gov.uk/government/statistics/proven-reoffending-statistics-april-2016-to-june-2016)  
27 [reoffending-statistics-april-2016-to-june-2016](https://www.gov.uk/government/statistics/proven-reoffending-statistics-april-2016-to-june-2016) (accessed 06 December 2018).

28  
29  
30  
31  
32  
33  
34  
35 55 House of Commons Committee of Public Accounts. Mental health in prisons: Eighth  
36 report of session 2017-19. London: House of Commons, 2017.  
37  
38  
39  
40 <https://publications.parliament.uk/pa/cm201719/cmselect/cmpublicacc/400/400.pdf>  
41 (accessed 06 December 2018).

42  
43  
44  
45  
46  
47 56 Her Majesty's Inspectorate of Prisons. Annual report 2015-16. London: Her Majesty's  
48 Inspectorate of Prisons, 2016. [https://www.justiceinspectors.gov.uk/hmiprison/wp-](https://www.justiceinspectors.gov.uk/hmiprison/wp-content/uploads/sites/4/2016/07/HMIP-AR_2015-16_web.pdf)  
49 [content/uploads/sites/4/2016/07/HMIP-AR\\_2015-16\\_web.pdf](https://www.justiceinspectors.gov.uk/hmiprison/wp-content/uploads/sites/4/2016/07/HMIP-AR_2015-16_web.pdf) (accessed 06 December  
50  
51  
52  
53  
54  
55 2018).

56  
57  
58  
59  
60  
23

- 1  
2  
3 1 57 Prisons & Probation Ombudsman. Learning lessons bulletin: Dementia. London: Prisons &  
4  
5  
6 2 Probation Ombudsman, 2016. [http://www.ppo.gov.uk/app/uploads/2016/07/PPO-](http://www.ppo.gov.uk/app/uploads/2016/07/PPO-Learning-Lessons-Bulletins_fatal-incident-investigations_issue-11_Dementia_WEB_Final.pdf)  
7  
8 3 [Learning-Lessons-Bulletins\\_fatal-incident-investigations\\_issue-11\\_Dementia\\_WEB\\_Final.pdf](http://www.ppo.gov.uk/app/uploads/2016/07/PPO-Learning-Lessons-Bulletins_fatal-incident-investigations_issue-11_Dementia_WEB_Final.pdf)  
9  
10 4 (accessed 06 December 2018).  
11  
12  
13 5  
14  
15 6 58 Prisons & Probation Ombudsman. Learning from PPO investigations: Older prisoners.  
16  
17 London: Prisons & Probation Ombudsman, 2017. [http://www.ppo.gov.uk/wp-](http://www.ppo.gov.uk/wp-content/uploads/2017/06/6-3460_PPO_Older-Prisoners_WEB.pdf)  
18 7 [content/uploads/2017/06/6-3460\\_PPO\\_Older-Prisoners\\_WEB.pdf](http://www.ppo.gov.uk/wp-content/uploads/2017/06/6-3460_PPO_Older-Prisoners_WEB.pdf) (accessed 06 December  
19 8  
20 9 2018).  
21  
22  
23 9  
24  
25 10  
26  
27 11 59 Cornish N, Edgar K, Hewson A, et al. Social care or systemic neglect? Older people on  
28 12 release from prison. London: Prison Reform Trust, 2016.  
29  
30 13 [http://www.prisonreformtrust.org.uk/Portals/0/Documents/Older-prisoner-](http://www.prisonreformtrust.org.uk/Portals/0/Documents/Older-prisoner-resettlement.pdf)  
31 14 [resettlement.pdf](http://www.prisonreformtrust.org.uk/Portals/0/Documents/Older-prisoner-resettlement.pdf) (accessed 06 December 2018).  
32  
33  
34  
35 15  
36  
37 16 60 Ministry of Justice. Government response to the Justice Committee's fifth report of  
38 17 session 2013-14: 'Older Prisoners'. London: Ministry of Justice, 2014.  
39  
40 18 [https://www.gov.uk/government/uploads/system/uploads/attachment\\_data/file/256609/r](https://www.gov.uk/government/uploads/system/uploads/attachment_data/file/256609/response-older-prisoners.pdf)  
41 19 [esponse-older-prisoners.pdf](https://www.gov.uk/government/uploads/system/uploads/attachment_data/file/256609/response-older-prisoners.pdf) (accessed 06 December 2018).  
42  
43  
44  
45 20  
46  
47  
48 21 61 Wangmo T, Handtke V, Bretschneider W, et al. Prisons should mirror society: the debate  
49 22 on age-segregated housing for older prisoners. *Ageing & Society* 2017;37(4):675-694  
50 23 doi:10.1017/S 0144686X15001373 [published Online First: 09 December 2015].  
51  
52  
53  
54  
55  
56  
57  
58  
59  
60

1  
2  
3 1 62 Kerbs JJ, Jolley JM, Kanaboshi N. The interplay between law and social science in the age  
4  
5  
6 2 segregation debate. *J Crime Justice* 2015;38(1):77-95 doi:10.1080/0735648X.2014.894856  
7  
8 3 [published Online First: 26 Mar 2014].  
9

10  
11 4  
12  
13 5 63 Alzheimer's Society. Making Your Home Dementia Friendly. London: Alzheimer's Society,  
14  
15 6 2015. <https://www.alzheimers.org.uk/get-support/making-your-home-dementia-friendly>  
16  
17 7 (accessed 06 December 2018).  
18  
19

20  
21 8  
22  
23 9 64 The King's Fund. Developing supportive design for people with dementia: The King's Fund  
24  
25 10 Enhancing the Healing Environment Programme 2009-2012. London: The King's Fund, 2013.  
26  
27 11 <https://www.kingsfund.org.uk/publications/developing-supportive-design-people-dementia>  
28  
29 12 (accessed 06 December 2018).  
30  
31

32  
33 13  
34  
35 14 65 The King's Fund. Environments for care at end of life: The King's Fund Enhancing the  
36  
37 15 Healing Environment Programme 2008-2010. London: The King's Fund, 2011.  
38  
39 16 <https://www.kingsfund.org.uk/publications/environments-care-end-life> (accessed 06  
40  
41 17 December 2018).  
42  
43  
44

45 18  
46  
47 19 66 The Howard League for Penal Reform. Preventing prison suicides: Perspectives from the  
48  
49 20 inside. London: The Howard League for Penal Reform, 2016. [https://howardleague.org/wp-](https://howardleague.org/wp-content/uploads/2016/05/Preventing-prison-suicide.pdf)  
50  
51 21 [content/uploads/2016/05/Preventing-prison-suicide.pdf](https://howardleague.org/wp-content/uploads/2016/05/Preventing-prison-suicide.pdf) (accessed 06 December 2018).  
52  
53  
54

55 22  
56  
57 23 67 National Institute for Health and Care Excellence. Dementia: assessment, management  
58  
59 24 and support for people living with dementia and their carers. London: National Institute for  
60

- 1  
2  
3 1 Health and Care Excellence, 2018.  
4  
5  
6 2 <https://www.nice.org.uk/guidance/ng97/chapter/Recommendations#supporting-carers>  
7  
8 3 (accessed 06 December 2018).  
9  
10  
11 4  
12  
13 5 68 Stewart W, Edmond SW. Prisoner peer caregiving: a literature review. *Nursing Standard*  
14  
15 6 2017;31(32):44-51 doi:10.7748/ns.2017.e10468 [published Online First 06 April 2017].  
16  
17  
18 7  
19  
20 8 69 Dillon G, Vinter LP, Winder B, Finch L. 'The guy might not even be able to remember why  
21  
22 9 he's here and what he's in for and why he's locked in': residents and staff experiences of  
23  
24 10 living and working alongside people with dementia who are serving prison sentences for a  
25  
26 11 sexual offence. *Psychol Crime Law* 2018;1-18. doi:10.1080/1068316X.2018.1535063  
27  
28 12 [published Online First 17 October 2018].  
29  
30  
31  
32 13  
33  
34 14 70 Williams BA, Stern, MF, Mellow J, et al. Aging in correctional custody: Setting a policy  
35  
36 15 agenda for older prisoner health care. *Am J Public Health* 2012;102(8),1475-1481  
37  
38 16 doi:10.2105/AJPH.2012.300704 [published Online First: 11 July 2012].  
39  
40  
41  
42 17  
43  
44 18 71 INVOLVE. Briefing notes for researchers: Involving the public in NHS, public health and  
45  
46 19 social care research. Eastleigh: INVOLVE, 2012. [https://www.invo.org.uk/wp-](https://www.invo.org.uk/wp-content/uploads/2014/11/9938_INVOLVE_Briefing_Notes_WEB.pdf)  
47  
48 20 [content/uploads/2014/11/9938\\_INVOLVE\\_Briefing\\_Notes\\_WEB.pdf](https://www.invo.org.uk/wp-content/uploads/2014/11/9938_INVOLVE_Briefing_Notes_WEB.pdf) (accessed on 18 June 2019).  
49  
50  
51  
52 21  
53  
54 22 72 Dementia Action Alliance. Dementia Action Alliance: About. 2018.  
55  
56 23 [https://www.dementiaaction.org.uk/who\\_we\\_are](https://www.dementiaaction.org.uk/who_we_are) (accessed 06 December 2018).  
57  
58  
59 24  
60



1  
2  
3  
4  
5  
6  
7  
8  
9  
10  
11  
12  
13  
14  
15  
16  
17  
18  
19  
20  
21  
22  
23  
24  
25  
26  
27  
28  
29  
30  
31  
32  
33  
34  
35  
36  
37  
38  
39  
40  
41  
42  
43  
44  
45  
46  
47  
48  
49  
50  
51  
52  
53  
54  
55  
56  
57  
58  
59  
60

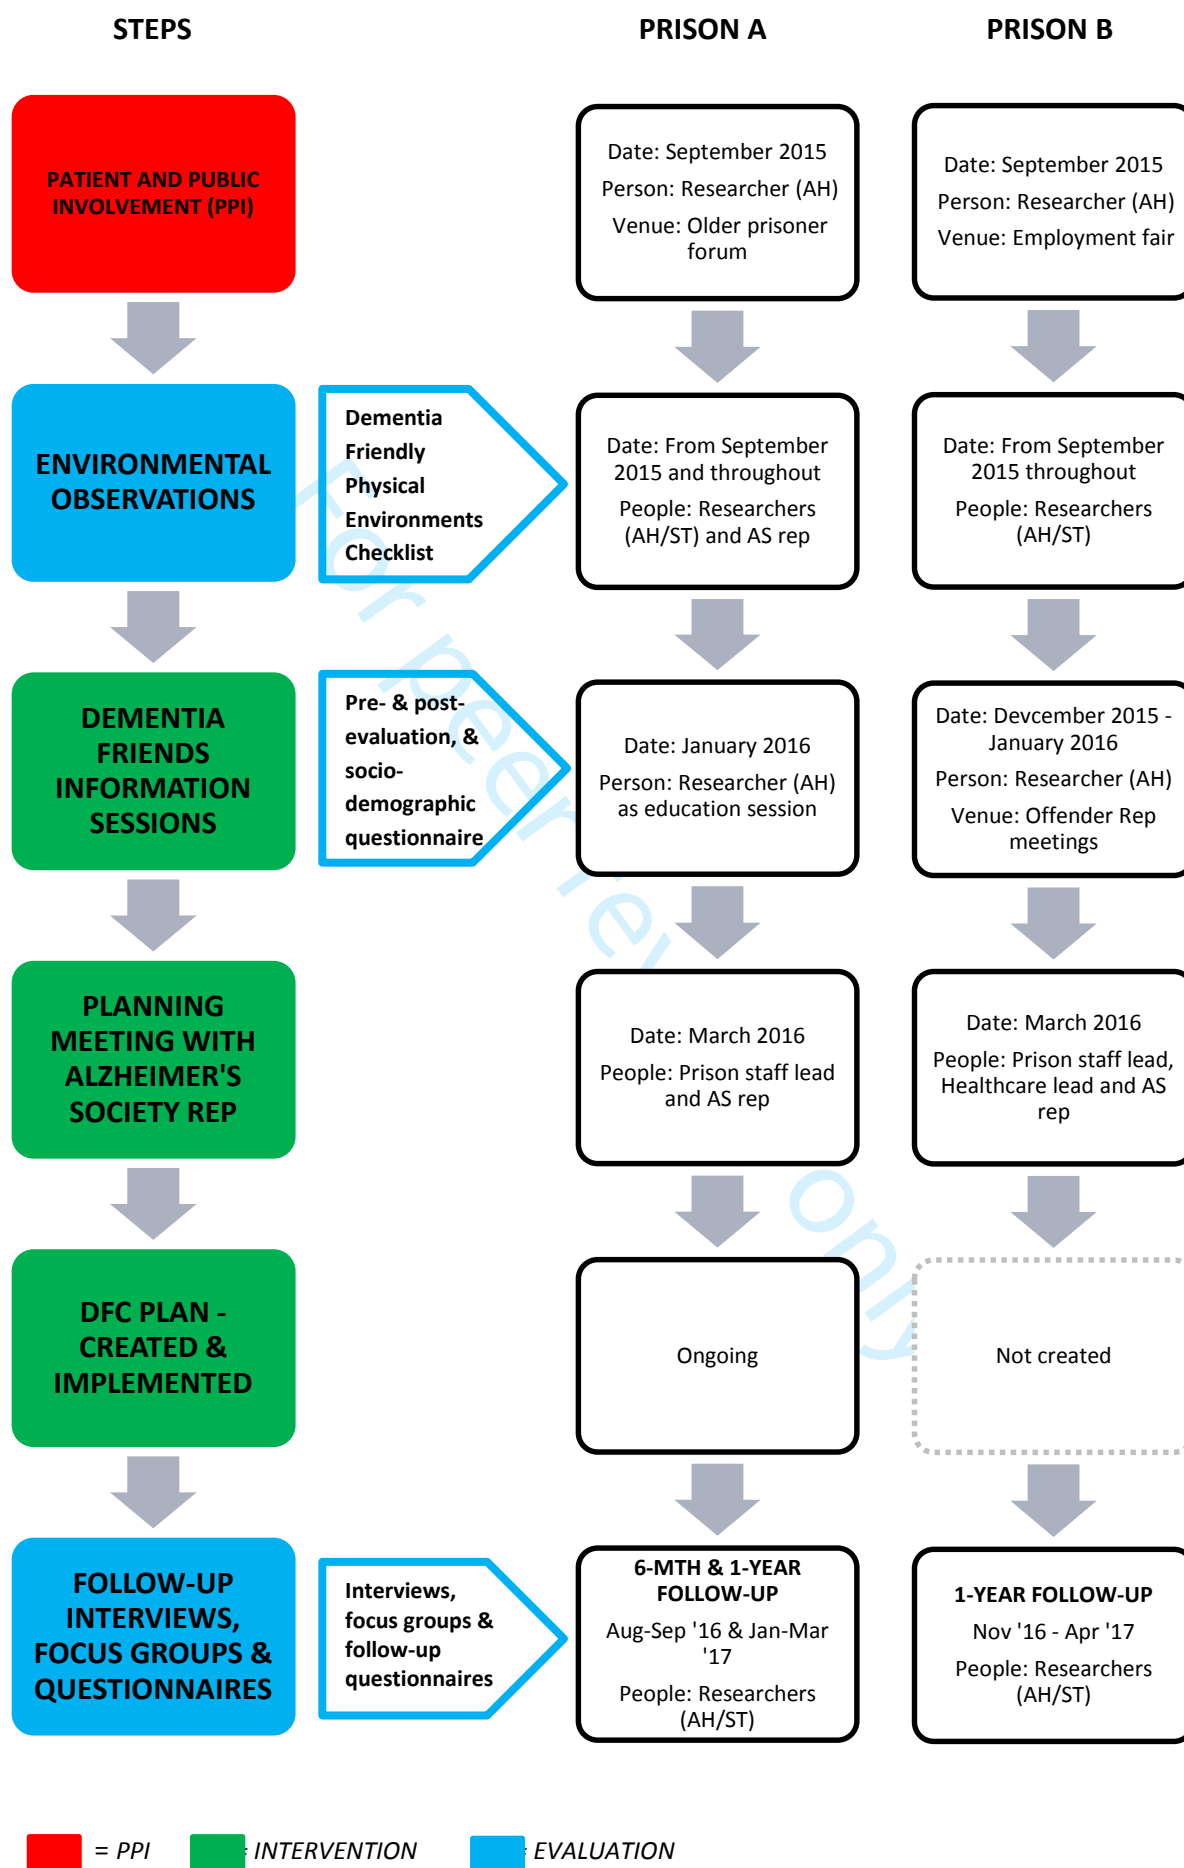

Figure 1: Steps involved in the study <http://bmjopen.bmj.com/site/about/guidelines.xhtml>

| TOTAL NUMBER OF PARTICIPANTS<br>n=68 |                   |                       |                  |
|--------------------------------------|-------------------|-----------------------|------------------|
| Prison A<br>n=38                     |                   | Prison B<br>n=30      |                  |
| Prisoners (P)<br>n=28                | Staff (S)<br>n=10 | Prisoners (P)<br>n=22 | Staff (S)<br>n=8 |

| Information session attendees<br>n=45 |          |                  |          |
|---------------------------------------|----------|------------------|----------|
| Prison A<br>n=28                      |          | Prison B<br>n=17 |          |
| P<br>n=25                             | S<br>n=3 | P<br>n=12        | S<br>n=5 |

| TOTAL PARTICIPANTS AT 6-MONTHS FOLLOW-UP<br>n=15 |          |               |        |
|--------------------------------------------------|----------|---------------|--------|
| Prison A<br>n=15                                 |          | Prison B<br>- |        |
| P<br>n=14                                        | S<br>n=1 | P<br>-        | S<br>- |

| Non-session attendees at 6-months, n=3 |          |               |        |
|----------------------------------------|----------|---------------|--------|
| Prison A<br>n=3                        |          | Prison B<br>- |        |
| P<br>n=2                               | S<br>n=1 | P<br>-        | S<br>- |

| 6-month follow-up (session attendees), n=12 |        |               |        |
|---------------------------------------------|--------|---------------|--------|
| Prison A<br>n=12                            |        | Prison B<br>- |        |
| P<br>n=12                                   | S<br>- | P<br>-        | S<br>- |

| 1-year follow-up (session attendees not at 6-mth follow-up) n=5 |        |                 |          |
|-----------------------------------------------------------------|--------|-----------------|----------|
| Prison A<br>n=2                                                 |        | Prison B<br>n=3 |          |
| P<br>n=2                                                        | S<br>- | P<br>n=2        | S<br>n=1 |

| 1-year follow-up (session attendees), n=2 |        |               |        |
|-------------------------------------------|--------|---------------|--------|
| Prison A<br>n=2                           |        | Prison B<br>- |        |
| P<br>n=2                                  | S<br>- | P<br>-        | S<br>- |

| TOTAL PARTICIPANTS AT 1-YEAR FOLLOW-UP<br>n=28 |          |                  |          |
|------------------------------------------------|----------|------------------|----------|
| Prison A<br>n=12                               |          | Prison B<br>n=16 |          |
| P<br>n=6                                       | S<br>n=6 | P<br>n=12        | S<br>n=4 |

| Non-session attendees at 1-year, n=21* |          |                  |          |
|----------------------------------------|----------|------------------|----------|
| Prison A<br>n=8*                       |          | Prison B<br>n=13 |          |
| P<br>n=2*                              | S<br>n=6 | P<br>n=10        | S<br>n=3 |

- KEY**
- Attendees of information session
  - Non-attendees of information session
  - Total follow-up evaluation participants

**Figure 2: Flow of participants through the Intervention and Evaluation stages of the study**

\* One prisoner from Prison A did not attend the information session, but was involved at both 6-month and 1-year follow-up

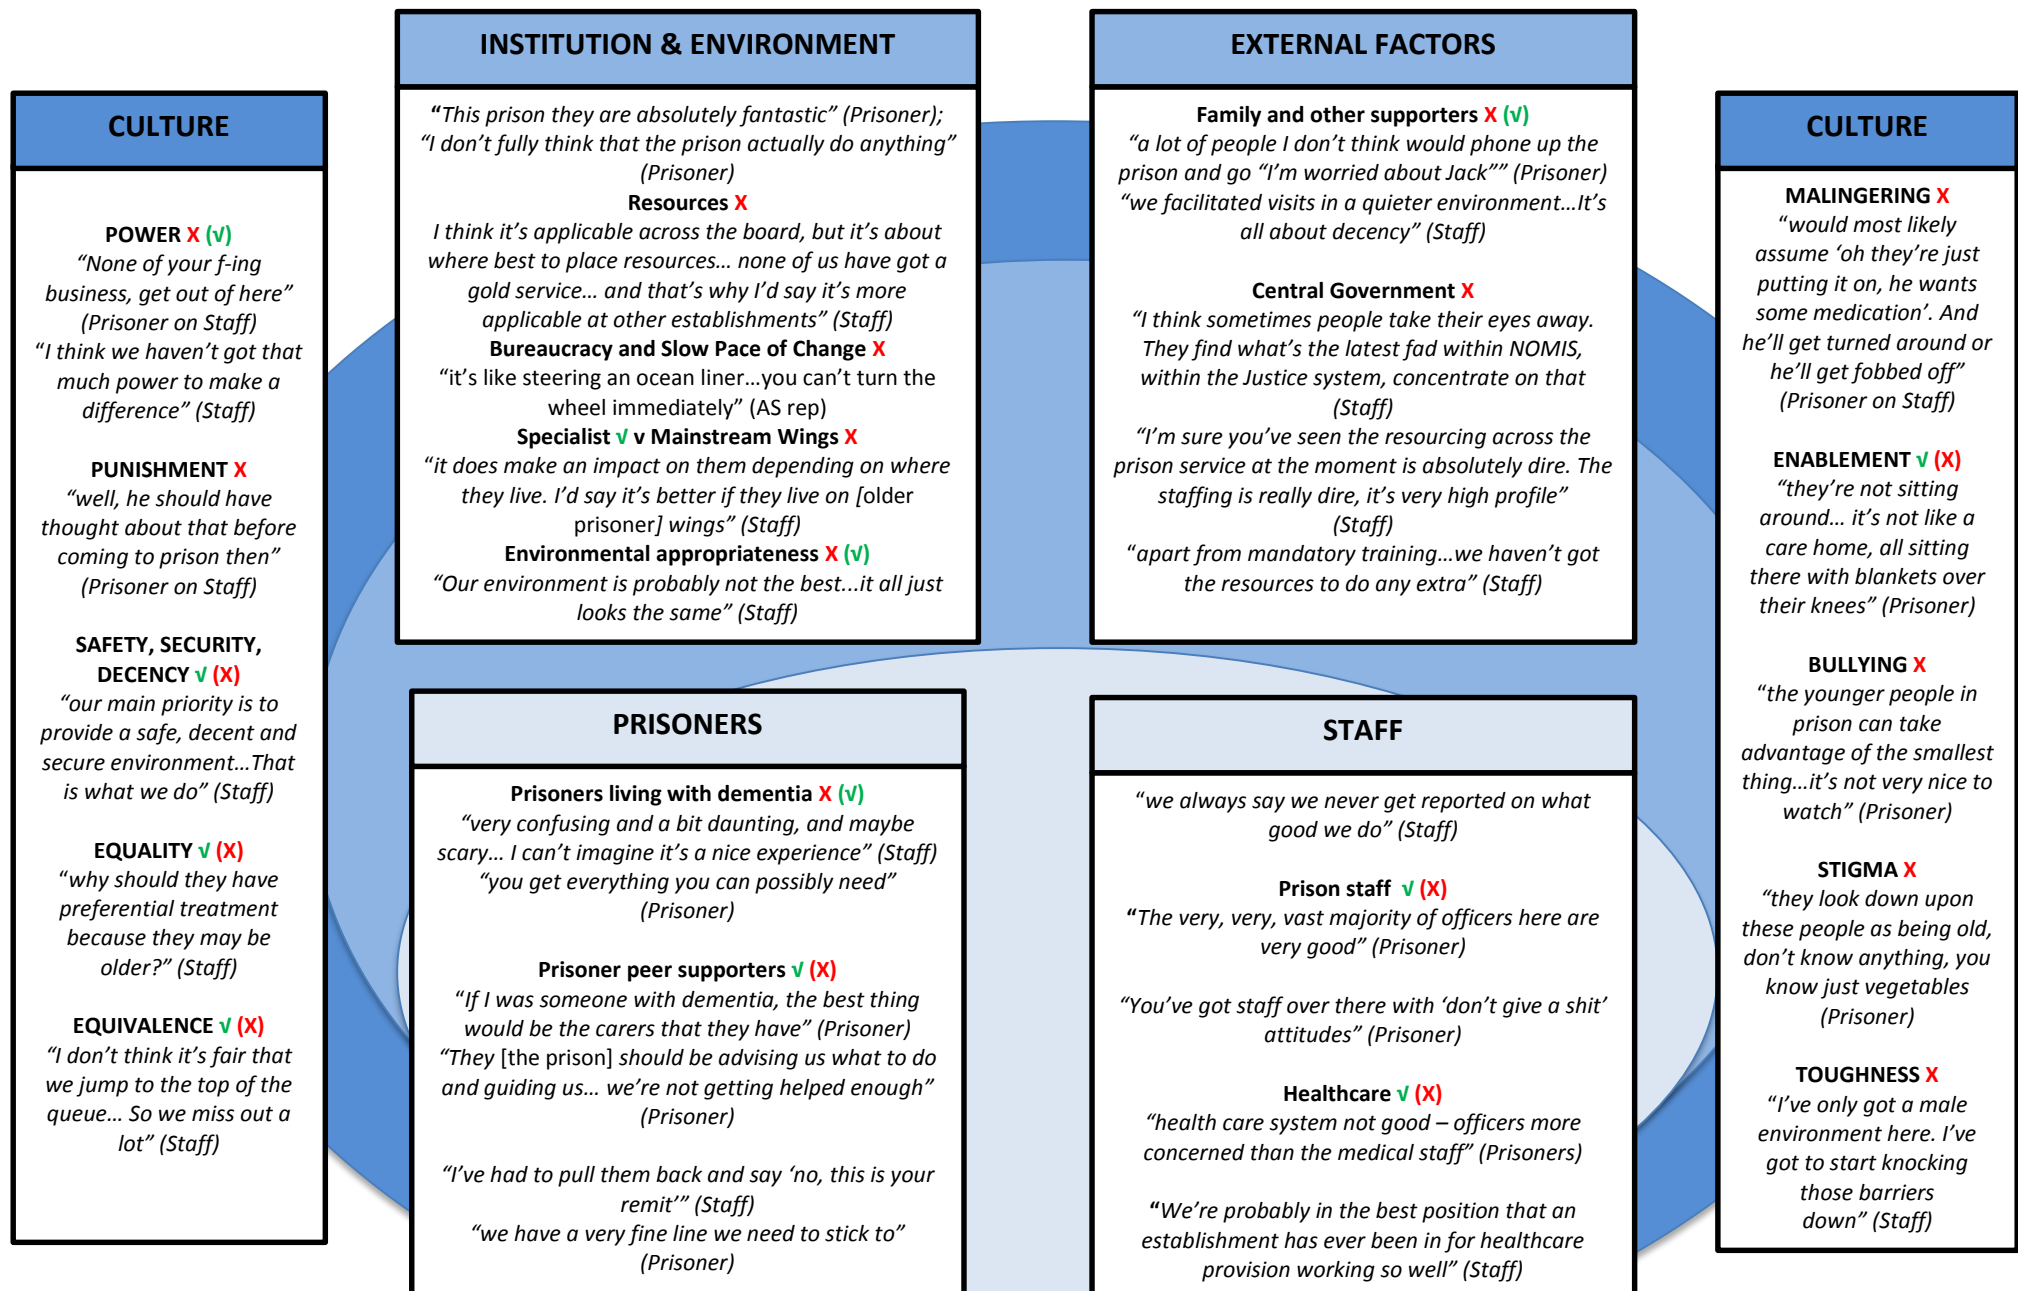

Figure 3: Barriers (X) and Facilitators (v) to applying Dementia Friendly Community principles, and their interactions

**Dementia Friendly Prisons**  
**PRE-Dementia Friends Awareness Session Questionnaire**

1  
2  
3  
4  
5  
6  
7  
8 **1. Do you know what Dementia is?** YES NO

9  
10  
11 If YES, What is it? .....

12  
13 **2. On a scale of 1-10 (1 being a little and 10 being a lot) how much do you know about Dementia?**

14  
15  
16 1 2 3 4 5 6 7 8 9 10

17  
18 **3. What do you know about Dementia? (main things) .....**

19  
20  
21  
22 **4. Do you know what causes Dementia?** YES NO

23  
24  
25 If YES, What? .....

26  
27 **5. If you wanted to find out more about Dementia while you were in prison where would you look?**  
**(Please circle all that apply).**

28  
29  
30  
31 Library Internet Television Newspaper Ask Prisoner Rep  
32  
33  
34 Healthcare Officers Chaplain Friends Family Elsewhere (specify)

35  
36 **6. Do you think there are any offenders here in HMP ..... who may have Dementia?** YES NO

37  
38  
39 If YES, do you think there are: a few / a lot / not sure?

40  
41  
42 What do you think about Dementia/people with Dementia?.....

43  
44  
45 **7. If you were worried about another offender having Dementia who would you tell? .....**

46  
47  
48 **8. If you were worried about a family member having Dementia who would you tell? .....**

49  
50  
51 **9. Can you think of ways you could help an offender with Dementia? Please describe: .....**

52  
53 **10. On a scale of 1 – 10 (1 being a little 10 being a lot) how confident would you be to talk to others**  
**about Dementia?**

54  
55  
56  
57 1 2 3 4 5 6 7 8 9 10

1  
2  
3 **11. Do you know what a Dementia Friendly Community is?** YES NO  
4  
5

6 If YES, What is it? .....

7  
8  
9  
10 **12. Would it be useful to learn more about Dementia?** YES NO  
11

12  
13 If YES: WHY would it be useful to learn about Dementia? .....

14  
15 WHAT would be useful to learn? .....

16  
17 If NO: Why not? .....

18  
19  
20  
21 **13. Do you think that if staff and offenders learn more about Dementia this will improve the lives of**  
22 **people with dementia in prison?** YES NO  
23

24 If YES, how? .....

25  
26 If NO, why not? .....

27  
28  
29  
30 **14. Do you think it will improve the lives of everyone else?** YES NO  
31

32 If YES, how? .....

33  
34 If NO, why not? .....

35  
36  
37  
38  
39 **15. How old are you** .....

**DEMENTIA FRIENDLY COMMUNITY AIMS QUESTIONNAIRE**

Please read the 11 statements below about the experiences of people with Dementia in THIS prison, and indicate how far you agree with each one by ticking the appropriate box. Please also indicate if you believe this has changed over the last year

|                                                                                      | Strongly agree | Agree | Neither agree nor disagree | Disagree | Disagree Strongly | HAS THIS CHANGED IN THE LAST YEAR?      |                                    |                                       |
|--------------------------------------------------------------------------------------|----------------|-------|----------------------------|----------|-------------------|-----------------------------------------|------------------------------------|---------------------------------------|
|                                                                                      |                |       |                            |          |                   | YES <input type="checkbox"/> For Better | No Change <input type="checkbox"/> | NO <input type="checkbox"/> For Worse |
| The views of prisoners with Dementia are listened to                                 |                |       |                            |          |                   |                                         |                                    |                                       |
| There is a good understanding of Dementia amongst prison staff                       |                |       |                            |          |                   |                                         |                                    |                                       |
| There is a good understanding of Dementia amongst the prisoners                      |                |       |                            |          |                   |                                         |                                    |                                       |
| Prison activities are accessible and appropriate to prisoners with Dementia          |                |       |                            |          |                   |                                         |                                    |                                       |
| Prisoners with Dementia are made to feel they can make a contribution to prison life |                |       |                            |          |                   |                                         |                                    |                                       |
| Early signs of Dementia are picked up on and acted upon, by the staff                |                |       |                            |          |                   |                                         |                                    |                                       |
| People with Dementia can engage fully in prison life                                 |                |       |                            |          |                   |                                         |                                    |                                       |
| Prisoners with Dementia are supported to live as independently as possible           |                |       |                            |          |                   |                                         |                                    |                                       |
| The prison is easy to get around for people with Dementia                            |                |       |                            |          |                   |                                         |                                    |                                       |
| Prisoners with Dementia are respected                                                |                |       |                            |          |                   |                                         |                                    |                                       |
| Prisoners with Dementia face stigma and discrimination here                          |                |       |                            |          |                   |                                         |                                    |                                       |

1  
2  
3  
4  
5  
6  
7  
8  
9  
10  
11  
12  
13  
14  
15  
16  
17  
18  
19  
20  
21  
22  
23  
24  
25  
26  
27  
28  
29  
30  
31  
32  
33  
34  
35  
36  
37  
38  
39  
40  
41  
42  
43  
44  
45  
46

### SUPPLEMENTARY FILE 3: ADDITIONAL SOCIO-DEMOGRAPHIC DATA FOR STUDY PARTICIPANTS

Table 1: socio-demographic data for the prisoners and staff who participated in the evaluation.

| Characteristic          | PRISON A (n=38) |      | PRISON B (n=30) |      | PRISONERS (n=50) |    | STAFF (n=18) |      | TOTAL (n=68) |      |
|-------------------------|-----------------|------|-----------------|------|------------------|----|--------------|------|--------------|------|
|                         | n               | %    | n               | %    | n                | %  | n            | %    | n            | %    |
| <b>Education</b>        |                 |      |                 |      |                  |    |              |      |              |      |
| No higher education     | 7               | 18.4 | 14              | 46.7 | 14               | 28 | 5            | 27.8 | 19           | 27.9 |
| Some higher education + | 5               | 13.2 | 12              | 40   | 12               | 24 | 7            | 38.9 | 19           | 27.9 |
| Missing                 | 26              | 68.4 | 4               | 13.3 | 24               | 48 | 6            | 33.3 | 30           | 44.1 |
| <b>Marital status</b>   |                 |      |                 |      |                  |    |              |      |              |      |
| Single                  | 7               | 18.4 | 19              | 63.3 | 22               | 44 | 4            | 22.2 | 26           | 38.2 |
| Married                 | 5               | 13.2 | 7               | 23.3 | 4                | 8  | 8            | 44.4 | 12           | 17.6 |
| Missing                 | 26              | 68.4 | 4               | 13.3 | 24               | 48 | 6            | 33.3 | 30           | 44.1 |
| <b>Children?</b>        |                 |      |                 |      |                  |    |              |      |              |      |
| Yes                     | 8               | 21.1 | 18              | 60   | 17               | 34 | 9            | 50   | 26           | 38.2 |
| No                      | 4               | 10.5 | 8               | 26.7 | 9                | 18 | 3            | 16.7 | 12           | 17.6 |
| Missing                 | 26              | 68.4 | 4               | 13.3 | 24               | 48 | 6            | 33.3 | 30           | 44.1 |
| <b>Race</b>             |                 |      |                 |      |                  |    |              |      |              |      |
| White                   | 11              | 28.9 | 22              | 73.3 | 21               | 42 | 12           | 66.7 | 33           | 48.5 |
| Other*                  | 0               | 0    | 4               | 13.3 | 4                | 8  | 0            | 0    | 4            | 5.9  |
| Missing                 | 27              | 71.1 | 4               | 13.3 | 25               | 50 | 6            | 33.3 | 31           | 45.6 |
| <b>Religion</b>         |                 |      |                 |      |                  |    |              |      |              |      |
| None                    | 2               | 5.3  | 8               | 26.7 | 5                | 10 | 5            | 27.8 | 10           | 14.7 |
| Christian               | 8               | 21.1 | 17              | 56.7 | 18               | 36 | 7            | 38.9 | 25           | 36.8 |
| Other**                 | 2               | 5.3  | 1               | 3.3  | 3                | 6  | 0            | 0    | 3            | 4.4  |
| Missing                 | 26              | 68.4 | 4               | 13.3 | 24               | 48 | 6            | 33.3 | 30           | 44.1 |
| <b>Political Views</b>  |                 |      |                 |      |                  |    |              |      |              |      |
| Conservative            | 2               | 5.3  | 4               | 13.3 | 5                | 10 | 1            | 5.6  | 6            | 8.8  |
| Moderate                | 6               | 15.8 | 14              | 46.7 | 16               | 32 | 4            | 22.2 | 20           | 29.4 |
| Liberal                 | 2               | 5.3  | 2               | 6.7  | 2                | 4  | 2            | 11.1 | 4            | 5.9  |
| Missing***              | 28              | 73.7 | 10              | 33.3 | 27               | 54 | 11           | 61.1 | 38           | 55.9 |

\*these were: Afro-Caribbean, African British, Black British, Mixed US/UK

\*\*these were: Buddhist, Muslim

1  
2  
3  
4  
5  
6  
7  
8  
9  
10  
11  
12  
13  
14  
15  
16  
17  
18  
19  
20  
21  
22  
23  
24  
25  
26  
27  
28  
29  
30  
31  
32  
33  
34  
35  
36  
37  
38  
39  
40  
41  
42  
43  
44  
45  
46

There is a large amount of missing data which impacts all of the socio-demographic variables and categories (prison A/B or staff/prisoner), but has mostly affected Prison A and 'prisoners'. This makes it difficult to interpret the data as it is unclear how representative it is.

For peer review only
