# Supplementary material for: Dementia-friendly prisons: a mixed-methods evaluation of the application of dementia-friendly community principles to two prisons in England
Source: PubMed Central journal article supplement — BMJ Open. 2019 Aug 8;9(8):e030087. doi: 10.1136/bmjopen-2019-030087 (PMC6701663; doi:10.1136/bmjopen-2019-030087), 2019-08-08
Supplement: bmjopen-2019-030087supp001.pdf [file bmjopen-2019-030087supp001.pdf]

**Dementia Friendly Prisons**  
**PRE-Dementia Friends Awareness Session Questionnaire**

- 1. Do you know what Dementia is?** YES NO
- If YES, What is it? .....
- 2. On a scale of 1-10 (1 being a little and 10 being a lot) how much do you know about Dementia?**
- 1    2    3    4    5    6    7    8    9    10
- 3. What do you know about Dementia? (main things) .....**
- 4. Do you know what causes Dementia?** YES NO
- If YES, What? .....
- 5. If you wanted to find out more about Dementia while you were in prison where would you look? (Please circle all that apply).**
- Library            Internet            Television            Newspaper            Ask Prisoner Rep
- Healthcare            Officers            Chaplain            Friends            Family            Elsewhere (specify)
- 6. Do you think there are any offenders here in HMP ..... who may have Dementia?** YES NO
- If YES, do you think there are: a few / a lot / not sure?
- What do you think about Dementia/people with Dementia?.....
- 7. If you were worried about another offender having Dementia who would you tell? .....**
- 8. If you were worried about a family member having Dementia who would you tell? .....**
- 9. Can you think of ways you could help an offender with Dementia? Please describe: .....**
- 10. On a scale of 1 – 10 (1 being a little 10 being a lot) how confident would you be to talk to others about Dementia?**
- 1    2    3    4    5    6    7    8    9    10

**11. Do you know what a Dementia Friendly Community is?** YES NO

If YES, What is it? .....

**12. Would it be useful to learn more about Dementia?** YES NO

If YES: WHY would it be useful to learn about Dementia? .....

WHAT would be useful to learn? .....

If NO: Why not? .....

**13. Do you think that if staff and offenders learn more about Dementia this will improve the lives of people with dementia in prison?** YES NO

If YES, how? .....

If NO, why not? .....

**14. Do you think it will improve the lives of everyone else?** YES NO

If YES, how? .....

If NO, why not? .....

**15. How old are you** .....
