# Supplementary material for: Dementia-friendly prisons: a mixed-methods evaluation of the application of dementia-friendly community principles to two prisons in England
Source: PubMed Central journal article supplement — BMJ Open. 2019 Aug 8;9(8):e030087. doi: 10.1136/bmjopen-2019-030087 (PMC6701663; doi:10.1136/bmjopen-2019-030087), 2019-08-08
Supplement: bmjopen-2019-030087supp002.pdf [file bmjopen-2019-030087supp002.pdf]

### DEMENTIA FRIENDLY COMMUNITY AIMS QUESTIONNAIRE

Please read the 11 statements below about the experiences of people with Dementia in THIS prison, and indicate how far you agree with each one by ticking the appropriate box. Please also indicate if you believe this has changed over the last year

|                                                                                      | Strongly agree | Agree | Neither agree nor disagree | Disagree | Disagree Strongly | HAS THIS CHANGED IN THE LAST YEAR? |           |                   |
|--------------------------------------------------------------------------------------|----------------|-------|----------------------------|----------|-------------------|------------------------------------|-----------|-------------------|
|                                                                                      |                |       |                            |          |                   | YES ✓<br>For Better                | No Change | NO X<br>For Worse |
| The views of prisoners with Dementia are listened to                                 |                |       |                            |          |                   |                                    |           |                   |
| There is a good understanding of Dementia amongst prison staff                       |                |       |                            |          |                   |                                    |           |                   |
| There is a good understanding of Dementia amongst the prisoners                      |                |       |                            |          |                   |                                    |           |                   |
| Prison activities are accessible and appropriate to prisoners with Dementia          |                |       |                            |          |                   |                                    |           |                   |
| Prisoners with Dementia are made to feel they can make a contribution to prison life |                |       |                            |          |                   |                                    |           |                   |
| Early signs of Dementia are picked up on and acted upon, by the staff                |                |       |                            |          |                   |                                    |           |                   |
| People with Dementia can engage fully in prison life                                 |                |       |                            |          |                   |                                    |           |                   |
| Prisoners with Dementia are supported to live as independently as possible           |                |       |                            |          |                   |                                    |           |                   |
| The prison is easy to get around for people with Dementia                            |                |       |                            |          |                   |                                    |           |                   |
| Prisoners with Dementia are respected                                                |                |       |                            |          |                   |                                    |           |                   |
| Prisoners with Dementia face stigma and discrimination here                          |                |       |                            |          |                   |                                    |           |                   |
