# Supplementary material for: Dementia-friendly prisons: a mixed-methods evaluation of the application of dementia-friendly community principles to two prisons in England
Source: PubMed Central journal article supplement — BMJ Open. 2019 Aug 8;9(8):e030087. doi: 10.1136/bmjopen-2019-030087 (PMC6701663; doi:10.1136/bmjopen-2019-030087), 2019-08-08
Supplement: bmjopen-2019-030087supp003.pdf [file bmjopen-2019-030087supp003.pdf]

## SUPPLEMENTARY FILE 3: ADDITIONAL SOCIO-DEMOGRAPHIC DATA FOR STUDY PARTICIPANTS

Table 1: socio-demographic data for the prisoners and staff who participated in the evaluation.

| Characteristic          | PRISON A (n=38) |      | PRISON B (n=30) |      | PRISONERS (n=50) |    | STAFF (n=18) |      | TOTAL (n=68) |      |
|-------------------------|-----------------|------|-----------------|------|------------------|----|--------------|------|--------------|------|
|                         | n               | %    | n               | %    | n                | %  | n            | %    | n            | %    |
| <b>Education</b>        |                 |      |                 |      |                  |    |              |      |              |      |
| No higher education     | 7               | 18.4 | 14              | 46.7 | 14               | 28 | 5            | 27.8 | 19           | 27.9 |
| Some higher education + | 5               | 13.2 | 12              | 40   | 12               | 24 | 7            | 38.9 | 19           | 27.9 |
| Missing                 | 26              | 68.4 | 4               | 13.3 | 24               | 48 | 6            | 33.3 | 30           | 44.1 |
| <b>Marital status</b>   |                 |      |                 |      |                  |    |              |      |              |      |
| Single                  | 7               | 18.4 | 19              | 63.3 | 22               | 44 | 4            | 22.2 | 26           | 38.2 |
| Married                 | 5               | 13.2 | 7               | 23.3 | 4                | 8  | 8            | 44.4 | 12           | 17.6 |
| Missing                 | 26              | 68.4 | 4               | 13.3 | 24               | 48 | 6            | 33.3 | 30           | 44.1 |
| <b>Children?</b>        |                 |      |                 |      |                  |    |              |      |              |      |
| Yes                     | 8               | 21.1 | 18              | 60   | 17               | 34 | 9            | 50   | 26           | 38.2 |
| No                      | 4               | 10.5 | 8               | 26.7 | 9                | 18 | 3            | 16.7 | 12           | 17.6 |
| Missing                 | 26              | 68.4 | 4               | 13.3 | 24               | 48 | 6            | 33.3 | 30           | 44.1 |
| <b>Race</b>             |                 |      |                 |      |                  |    |              |      |              |      |
| White                   | 11              | 28.9 | 22              | 73.3 | 21               | 42 | 12           | 66.7 | 33           | 48.5 |
| Other*                  | 0               | 0    | 4               | 13.3 | 4                | 8  | 0            | 0    | 4            | 5.9  |
| Missing                 | 27              | 71.1 | 4               | 13.3 | 25               | 50 | 6            | 33.3 | 31           | 45.6 |
| <b>Religion</b>         |                 |      |                 |      |                  |    |              |      |              |      |
| None                    | 2               | 5.3  | 8               | 26.7 | 5                | 10 | 5            | 27.8 | 10           | 14.7 |
| Christian               | 8               | 21.1 | 17              | 56.7 | 18               | 36 | 7            | 38.9 | 25           | 36.8 |
| Other**                 | 2               | 5.3  | 1               | 3.3  | 3                | 6  | 0            | 0    | 3            | 4.4  |
| Missing                 | 26              | 68.4 | 4               | 13.3 | 24               | 48 | 6            | 33.3 | 30           | 44.1 |
| <b>Political Views</b>  |                 |      |                 |      |                  |    |              |      |              |      |
| Conservative            | 2               | 5.3  | 4               | 13.3 | 5                | 10 | 1            | 5.6  | 6            | 8.8  |
| Moderate                | 6               | 15.8 | 14              | 46.7 | 16               | 32 | 4            | 22.2 | 20           | 29.4 |
| Liberal                 | 2               | 5.3  | 2               | 6.7  | 2                | 4  | 2            | 11.1 | 4            | 5.9  |
| Missing***              | 28              | 73.7 | 10              | 33.3 | 27               | 54 | 11           | 61.1 | 38           | 55.9 |

\*these were: Afro-Caribbean, African British, Black British, Mixed US/UK

\*\*these were: Buddhist, Muslim

There is a large amount of missing data which impacts all of the socio-demographic variables and categories (prison A/B or staff/prisoner), but has mostly affected Prison A and 'prisoners'. This makes it difficult to interpret the data as it is unclear how representative it is.
